# Supplementary material for: Adaptive carbonyl umpolung involving a carbanionic carbene Breslow intermediate: an alternative mechanism for NHC-mediated organocatalysis
Source: Royal Society of Chemistry journal article supplement (doi:10.1039/d3ob01195j), 2023-01-01
Supplement: d3ob01195j1.pdf [file d3ob01195j1.pdf]

# Supporting Information

for the article

## **Adaptive Carbonyl Umpolung Involving Carbanionic Carbene Breslow Intermediate: An Alternative Mechanism for NHC-mediated Organocatalysis**

Rinat R. Aysin and Konstantin I. Galkin

## Table of Contents

|                                                     |           |
|-----------------------------------------------------|-----------|
| <b>1. Experimental Part.</b> .....                  | <b>3</b>  |
| 1.1. General Information. ....                      | 3         |
| 1.2. Mechanistic experiments.....                   | 3         |
| 1.3. Selected NMR spectra of reaction mixtures..... | 6         |
| <b>2. Computational details.</b> .....              | <b>14</b> |
| <b>3. Optimized xyz-Cartesian coordinates</b> ..... | <b>28</b> |

## 1. Experimental Part.

### 1.1. General Information.

Commercially available starting compounds, reagents and solvents were of analytical grade. Imidazolium salts were obtained by using published synthetic protocols or purchased commercially. NMR spectra were recorded using a Bruker Avance 300 spectrometer operating at 300.1 MHz for  $^1\text{H}$  and 75.5 MHz for  $^{13}\text{C}$ . NMR chemical shifts were measured relative to residual solvent peaks. The processing was carried out using the MestReNova software.

### 1.2. Mechanistic experiments.

We conducted a comparative experimental study on the catalytic activity of 1,3-bis(2,4,6-trimethylphenyl)-imidazol-2-ylidene (IMes) and 1,3-bis(2,6-diisopropylphenyl)-imidazol-2-ylidene (IPr) in the benzoin condensation reaction with various aromatic aldehydes and isobutyraldehyde. The results of these experiments are presented in Tables S1 and S2. The NHCs were generated *in situ* in the H-bonded form by deprotonating the appropriate imidazolium cations with DBU or sodium *tert*-butoxide, following previously reported methods.<sup>[1]</sup> The best selectivity was observed for the reactions with furaldehydes under ambient conditions for 24 hours. In contrast, benzaldehydes exhibited lower reactivity (Table S1, entries 6-9; Table S2, entries 6-8), and isobutyraldehyde was almost inactive (Table S1, entry 10; Table S2, entry 9). Additionally, we investigated the influence of solvent on the selectivity of the benzoin condensation of furfural. The best results were obtained when using THF and methanol as solvents, while the reactions conducted under solvent-free conditions showed the lowest efficiency (Table S1, entries 11-16; Table S2, entries 10-16).

**General procedure for benzoin condensation.** A mixture of aldehyde (0.5 mmol), imidazolium chloride (0.05 mmol) and a base (0.5 mmol) in deuterated solvent was treated at the appropriate temperature and time conditions (24 h at 22 °C or 3 h at 80 °C) under an argon atmosphere. The degree of conversion and the yield of benzoin condensation products were measured by NMR using DBU or PhSiMe<sub>3</sub> as internal standard.

Table S1. Catalytic activity of [IMesH]<sup>+</sup> in benzoin condensation of aldehydes.



| Entry          | Imidazolium salt, base        | Solvent                    | Aldehyde               | T (°C) | Conversion/yield (%) |
|----------------|-------------------------------|----------------------------|------------------------|--------|----------------------|
| 1              | [IMesH]Cl, DBU                | CD <sub>3</sub> CN         | Furfural               | 22 °C  | 98/51                |
| 2              | [IMesH]Cl, DBU                | CD <sub>3</sub> CN         | Furfural               | 80 °C  | 96/41                |
| 3 <sup>a</sup> | [IMesH]Cl, DBU                | CD <sub>3</sub> CN         | Furfural               | 22 °C  | 96/45                |
| 4              | [IMesH]Cl, <sup>t</sup> BuONa | CD <sub>3</sub> CN         | Furfural               | 22 °C  | 99/32                |
| 5              | [IMesH]Cl, DBU                | CD <sub>3</sub> CN         | 5-Methylfurfural       | 22 °C  | 93/63                |
| 6              | [IMesH]Cl, DBU                | CD <sub>3</sub> CN         | Benzaldehyde           | 22 °C  | 23/18                |
| 7              | [IMesH]Cl, DBU                | CD <sub>3</sub> CN         | Benzaldehyde           | 80 °C  | 77/24                |
| 8              | [IMesH]Cl, DBU                | CD <sub>3</sub> CN         | <i>m</i> -Anisaldehyde | 80 °C  | 84/41                |
| 9 <sup>a</sup> | [IMesH]Cl, DBU                | CD <sub>3</sub> CN         | <i>m</i> -Anisaldehyde | 80 °C  | 84/47                |
| 10             | [IMesH]Cl, DBU                | CD <sub>3</sub> CN         | Isobutyraldehyde       | 80 °C  | 38/8                 |
| 11             | [IMesH]Cl, DBU                | CDCl <sub>3</sub>          | Furfural               | 22 °C  | 96/73                |
| 12             | [IMesH]Cl, DBU                | THF- <i>d</i> <sub>8</sub> | Furfural               | 22 °C  | 96/90                |
| 13             | [IMesH]Cl, DBU                | Neat                       | Furfural               | 22 °C  | 80/20                |
| 14             | [IMesH]Cl, <sup>t</sup> BuONa | CD <sub>3</sub> OD         | Furfural               | 22 °C  | 100/77               |
| 15             | [IMesH]Cl, <sup>t</sup> BuONa | THF- <i>d</i> <sub>8</sub> | Furfural               | 22 °C  | 97/70                |
| 16             | [IMesH]Cl, <sup>t</sup> BuONa | Neat                       | Furfural               | 22 °C  | 34/5                 |

<sup>a</sup> 0.1 mmol of a base was used.

Table S2. Catalytic activity of [PrH]<sup>+</sup> in benzoin condensation of aldehydes.



| Entry          | Imidazolium salt, base       | Solvent                    | Aldehyde               | T (°C) | Conversion/yield (%) |
|----------------|------------------------------|----------------------------|------------------------|--------|----------------------|
| 1              | [IPrH]Cl, DBU                | CD <sub>3</sub> CN         | Furfural               | 22 °C  | 99/40                |
| 2 <sup>a</sup> | [IPrH]Cl, DBU                | CD <sub>3</sub> CN         | Furfural               | 22 °C  | 99/33                |
| 3              | [IPrH]Cl, DBU                | CD <sub>3</sub> CN         | Furfural               | 80 °C  | 99/38                |
| 4              | [IPrH]Cl, <sup>t</sup> BuONa | CD <sub>3</sub> CN         | Furfural               | 22 °C  | 99/34                |
| 5              | [IPrH]Cl, DBU                | CD <sub>3</sub> CN         | 5-Methylfurfural       | 22 °C  | 93/53                |
| 6              | [IPrH]Cl, DBU                | CD <sub>3</sub> CN         | Benzaldehyde           | 80 °C  | 53/5                 |
| 7              | [IPrH]Cl, DBU                | CD <sub>3</sub> CN         | <i>m</i> -Anisaldehyde | 80 °C  | 31/14                |
| 8 <sup>a</sup> | [IPrH]Cl, DBU                | CD <sub>3</sub> CN         | <i>m</i> -Anisaldehyde | 80 °C  | 46/20                |
| 9              | [IPrH]Cl, DBU                | CD <sub>3</sub> CN         | Isobutyraldehyde       | 80 °C  | 31/2                 |
| 10             | [IPrH]Cl, DBU                | CD <sub>3</sub> OD         | Furfural               | 22 °C  | 100/71               |
| 11             | [IPrH]Cl, DBU                | CDCl <sub>3</sub>          | Furfural               | 22 °C  | 95/56                |
| 12             | [IPrH]Cl, DBU                | THF- <i>d</i> <sub>8</sub> | Furfural               | 22 °C  | 98/82                |
| 13             | [IPrH]Cl, DBU                | Neat                       | Furfural               | 22 °C  | 79/18                |
| 14             | [IPrH]Cl, <sup>t</sup> BuONa | CD <sub>3</sub> OD         | Furfural               | 22 °C  | 100/94               |
| 15             | [IPrH]Cl, <sup>t</sup> BuONa | THF- <i>d</i> <sub>8</sub> | Furfural               | 22 °C  | 97/83                |
| 16             | [IPrH]Cl, <sup>t</sup> BuONa | Neat                       | Furfural               | 22 °C  | 51/10                |

<sup>a</sup> 0.1 mmol of a base was used.

[1] (a) K. I. Galkin and V. P. Ananikov, Towards Improved Biorefinery Technologies: 5-Methylfurfural as a Versatile C(6) Platform for Biofuels Development, *ChemSusChem*, 2019, **12**, 185-189; (b) R. S. Menon, A. T. Biju and V. Nair, Recent advances in N-heterocyclic carbene (NHC)-catalysed benzoin reactions, *Beilstein J. Org. Chem.*, 2016, **12**, 444-461.

### 1.3. Selected NMR spectra of reaction mixtures.

**Figure S1.**  $^1\text{H}$  NMR spectra of the reaction mixture (conditions from entry 4, Table S1).



**Figure S2.**  $^1\text{H}$  NMR spectra of the reaction mixture (conditions from entry 5, Table S1).



**Figure S3.**  $^1\text{H}$  NMR spectra of the reaction mixture (conditions from entry 7, Table S1).



**Figure S4.**  $^1\text{H}$  NMR spectra of the reaction mixture (conditions from entry 9, Table S1).



**Figure S5.**  $^1\text{H}$  NMR spectra of the reaction mixture (conditions from entry 12, Table S1).



**Figure S6.**  $^1\text{H}$  NMR spectra of the reaction mixture (conditions from entry 4, Table S2).



**Figure S7.**  $^1\text{H}$  NMR spectra of the reaction mixture (conditions from entry 8, Table S2).



**Figure S8.**  $^1\text{H}$  NMR spectra of the reaction mixture (conditions from entry 14, Table S2).



## 2. Computational details.

The reaction energy profiles of the benzoin condensation of furfural *via* paths A, B, and C (Schemes S3–S5) were calculated using the ORCA v.4.2.1 software<sup>[1]</sup> at the PBE0/Def2TZVP level<sup>[2]</sup> in the frame of the CPCM solvation model<sup>[3]</sup> with MeOH parameters. For acceleration, the RIJCOSX approximation<sup>[4]</sup> with the Def2/j fitting<sup>[5]</sup> basis set was used. Frequencies and eigenvectors of normal modes were calculated in harmonic approximation for all the reaction participants; virtual modes were absent for the intermediates, whereas one virtual mode was found for the transition states. The optimized xyz-Cartesian coordinates are presented in Section 3. The calculated arbitrary energies for the reaction participants are provided in Table S3 (R = Mes) and Table S4 (R = Dipp). The orbital-weighted Fukui<sup>[6]</sup> indices at the same level for the intermediates **IMes-III-A**, **IMes-III-B**, and **IMes-III-C** (Tables S7–S9) were calculated using the MultiWFN software v.3.7.<sup>[7]</sup>

### References:

- [1](a) F. Neese, The ORCA program system. *Wiley Interdiscip. Rev. Comput. Mol. Sci.* **2012**, 2, 73–78. (b) F. Neese, Software update: The ORCA program system, version 4.0. *Wiley Interdiscip. Rev. Comput. Mol. Sci.* **2018**, 8, e1327.
- [2](a) C. Adamo, V. Barone, *J. Chem. Phys.* **1999**, 110, 6158–6169. (b) F. Weigend, R. Ahlrichs, *Phys. Chem. Chem. Phys.* **2005**, 7, 3297–3305.
- [3](a) A. Klamt, G. J. Schuurmann, *Chem. Soc., Perkin Trans.* **1993**, 2, 799. (b) J. Andzelm, C. Kölmel, A. J. Klamt, *Chem. Phys.* **1995**, 103, 9312–9320. (c) V. Barone, M. Cossi, *J. Phys. Chem. A* **1998**, 102, 1995–2001. (d) M. Cossi, N. Rega, G. Scalmani, V. Barone, *J. Comput. Chem.* **2003**, 24, 669–681.
- [4](a) F. Neese, *J. Comput. Chem.* **2003**, 24, 1740–1747. (b) F. Neese, F. Wennmohs, A. Hansen, U. Becker, *Chem. Phys.* **2009**, 356, 98–109. (c) A. K. Dutta, F. Neese, R. Izsak, *J. Chem. Phys.* **2016**, 144, 034102.
- [5] F. Weigend, *Phys. Chem. Chem. Phys.* **2006**, 8, 1057–1065.
- [6] R. Pino-Rios, D. Inostroza, G. Cárdenas-Jirón, W. Tiznado, *J. Phys. Chem. A*, **2019**, 123, 10556–10562.
- [7] Multiwfn Program, <http://sobereva.com/multiwfn/>



**Scheme S1.** Classical mechanism of the imidazolylidene-catalyzed benzoin condensation with involvement of the C2 carbene. B = base. R,  $R^1$  = alkyl or aryl.



**Scheme S2.** Generation of the different imidazolium-derived carbenes.



**Scheme S3.** The benzoin condensation of furfural *via* path A.



**Scheme S4.** The benzoin condensation of furfural *via* path B.



**Scheme S5.** The benzoin condensation of furfural *via* path C.

**Table S3.** Arbitrary energy values for the benzoin condensation of furfural mediated by the [IMesH]<sup>+</sup>-derived catalytically active intermediates.

| Reaction participant       | $\Delta E_{\text{tot}}$ ,<br>kcal/mol | $\Delta H^{\circ}_{298}$ ,<br>kcal/mol | $\Delta G^{\circ}_{298}$ ,<br>kcal/mol |
|----------------------------|---------------------------------------|----------------------------------------|----------------------------------------|
| <b>[IMesH]<sup>+</sup></b> | 0.0                                   | 0.0                                    | 0.0                                    |
| <b>IMes-I(H)-A</b>         | -19.5                                 | -19.1                                  | -24.5                                  |
| <b>IMes-I-A</b>            | -14.0                                 | -12.1                                  | -31.8                                  |
| <b>IMes-TS1-A</b>          | -13.4                                 | -12.2                                  | -5.4                                   |
| <b>IMes-II-A</b>           | -28.5                                 | -28.7                                  | -18.1                                  |
| <b>IMes-TS2-A</b>          | -10.6                                 | -9.6                                   | -1.9                                   |
| <b>IMes-III-A</b>          | -24.5                                 | -22.6                                  | -17.0                                  |
| <b>IMes-IV-A</b>           | -24.2                                 | -24.4                                  | 0.9                                    |
| <b>IMes-V-A</b>            | -27.6                                 | -27.4                                  | -2.9                                   |
| <b>VI...IMes-I(H)-A</b>    | -31.1                                 | -30.3                                  | -8.4                                   |
| <b>VI + IMes-I(H)-A</b>    | -26.5                                 | -27.0                                  | -17.6                                  |
|                            |                                       |                                        |                                        |
| <b>IMes-I(H2)-B</b>        | -17.9                                 | -17.1                                  | -27.4                                  |
| <b>IMes-I(H)-B</b>         | -9.7                                  | -7.9                                   | -31.9                                  |
| <b>IMes-I-B</b>            | -1.6                                  | 1.3                                    | -36.6                                  |
| <b>IMes-TS1-B</b>          | -0.2                                  | 1.1                                    | -8.2                                   |
| <b>IMes-II-B</b>           | -37.8                                 | -36.3                                  | -45.2                                  |
| <b>IMes-TS2-B</b>          | -16.8                                 | -15.9                                  | -23.1                                  |
| <b>IMes-III-B</b>          | -17.6                                 | -15.3                                  | -26.0                                  |
| <b>IMes-IV-B</b>           | -45.6                                 | -44.3                                  | -38.2                                  |
| <b>IMes-V-B</b>            | -44.0                                 | -43.1                                  | -36.1                                  |
| <b>VI...IMes-I(H)-B</b>    | -34                                   | -32.8                                  | -27.0                                  |
| <b>VI + IMes-I(H)-B</b>    | -16.7                                 | -15.8                                  | -25.0                                  |
|                            |                                       |                                        |                                        |
| <b>IMes-I(H)-C</b>         | -9.3                                  | -9.0                                   | -14.3                                  |
| <b>IMes-I-C</b>            | -2.3                                  | 0.2                                    | -21.1                                  |
| <b>IMes-TS1-C</b>          | -2.7                                  | -2.8                                   | 7.0                                    |
| <b>IMes-II-C</b>           | -28.7                                 | -28.2                                  | -19.6                                  |
| <b>IMes-TS2-C</b>          | -9.0                                  | -8.9                                   | 0.8                                    |
| <b>IMes-III-C</b>          | -15.2                                 | -13.8                                  | -6.7                                   |
| <b>IMes-IV-C</b>           | -34.4                                 | -34.4                                  | -9.9                                   |
| <b>IMes-V-C</b>            | -34.2                                 | -34.5                                  | -9.6                                   |
| <b>VI...IMes-I(H)-C</b>    | -24.7                                 | -25.0                                  | -0.4                                   |
| <b>VI + IMes-I(H)-C</b>    | -16.3                                 | -16.9                                  | -7.4                                   |
|                            |                                       |                                        |                                        |
| <b>Furfural</b>            | 0.0                                   | 0.0                                    | 0.0                                    |
| <b>VI</b>                  | -7.0                                  | -7.9                                   | 6.9                                    |

**Table S4.** Arbitrary energy values for the benzoin condensation of furfural, benzaldehyde and isobutyraldehyde mediated by the [IPrH]<sup>+</sup>-derived catalytically active intermediates.

| Reaction participant      | $\Delta E_{\text{tot}}$ ,<br>kcal/mol | $\Delta H^{\circ}_{298}$ ,<br>kcal/mol | $\Delta G^{\circ}_{298}$ ,<br>kcal/mol |
|---------------------------|---------------------------------------|----------------------------------------|----------------------------------------|
| [IPrH] <sup>+</sup>       | 0.0                                   | 0.0                                    | 0.0                                    |
| IPr-I(H)-A                | -21.9                                 | -21.8                                  | -26.1                                  |
| IPr-I-A                   | -15.0                                 | -14.1                                  | -31.7                                  |
| IPr-TS1-A                 | -12.3                                 | -11.9                                  | -2.6                                   |
| IPr-II-A                  | -29.9                                 | -29.2                                  | -20.4                                  |
| IPr-TS2-A                 | -9.1                                  | -8.8                                   | 1.2                                    |
| IPr-III-A                 | -23.7                                 | -23.1                                  | -13.5                                  |
| IPr-IV-A                  | -23.8                                 | -23.8                                  | 1.3                                    |
| IPr-V-A                   | -25.3                                 | -25.7                                  | 0.1                                    |
| VI...IPr-I(H)-A           | -34.4                                 | -32.8                                  | -12.5                                  |
| VI + IPr-I(H)-A           | -28.9                                 | -29.7                                  | -19.2                                  |
| IPr-TS1 <sup>Ph</sup> -A  | -11.0                                 | -10.8                                  | -0.8                                   |
| IPr-II <sup>Ph</sup> -A   | -28.6                                 | -28.1                                  | -18.3                                  |
| IPr-TS2 <sup>Ph</sup> -A  | -6.6                                  | -6.3                                   | 4.0                                    |
| IPr-III <sup>Ph</sup> -A  | -20.8                                 | -19.8                                  | -10.9                                  |
| IPr-TS1 <sup>iPr</sup> -A | -13.1                                 | -12.4                                  | -4.4                                   |
| IPr-II <sup>iPr</sup> -A  | -29.1                                 | -28.9                                  | -19.4                                  |
| IPr-TS2 <sup>iPr</sup> -A | -6.8                                  | -7.0                                   | 3.7                                    |
| IPr-III <sup>iPr</sup> -A | -18.0                                 | -17.6                                  | -8.4                                   |
| IPr-I(H2)-B               | -22.6                                 | -21.0                                  | -33.2                                  |
| IPr-I(H)-B                | -14.1                                 | -12.1                                  | -36.8                                  |
| IPr-I-B                   | 0.7                                   | 1.5                                    | -31.2                                  |
| IPr-TS1-B                 | -18.8                                 | -17.3                                  | -25.8                                  |
| IPr-II-B                  | -41.7                                 | -40.2                                  | -48.9                                  |
| IPr-TS2-B                 | -16.2                                 | -25.7                                  | -32.0                                  |
| IPr-III-B                 | -47.7                                 | -46.7                                  | -40.1                                  |
| IPr-IV-B                  | -46.9                                 | -45.7                                  | -39.1                                  |
| IPr-V-B                   | -39.9                                 | -37.4                                  | -35.4                                  |
| VI...IPr-I(H)-B           | -27.3                                 | -26.3                                  | -35.9                                  |
| VI + IPr-I(H)-B           | -21.1                                 | -20.0                                  | -29.0                                  |
| IPr-TS1 <sup>Ph</sup> -B  | -14.7                                 | -13.0                                  | -22.0                                  |
| IPr-II <sup>Ph</sup> -B   | -40.3                                 | -38.8                                  | -47.2                                  |
| IPr-TS2 <sup>Ph</sup> -B  | -16.3                                 | -14.8                                  | -22.9                                  |
| IPr-III <sup>Ph</sup> -B  | -18.8                                 | -16.5                                  | -26.6                                  |

|                                |       |       |       |
|--------------------------------|-------|-------|-------|
| <b>IPr-TS1<sup>iPr</sup>-B</b> | -12.7 | -11.8 | -19.8 |
| <b>IPr-II<sup>iPr</sup>-B</b>  | -40.9 | -40.1 | -47.7 |
| <b>IPr-TS2<sup>iPr</sup>-B</b> | -7.0  | -5.7  | -13.9 |
| <b>IPr-III<sup>iPr</sup>-B</b> | -1.3  | 0.5   | -9.1  |

**Table S5.** Calculated energies (kcal mol<sup>-1</sup>) for the deprotonation of *N*-alkyl and *N*-aryl substituted imidazolium cations and C2 carbenes.

| R=                                                                                 | Me                       |                          | <sup>i</sup> Pr          |                          | <sup>t</sup> Bu          |                          | Mes                      |                          | Dipp                     |                          |
|------------------------------------------------------------------------------------|--------------------------|--------------------------|--------------------------|--------------------------|--------------------------|--------------------------|--------------------------|--------------------------|--------------------------|--------------------------|
| Reaction                                                                           | $\Delta H_{298}^{\circ}$ | $\Delta G_{298}^{\circ}$ |
|   | -11.5                    | -28.9                    | -9.4                     | -28.3                    | -8.6                     | -26.9                    | -12.1                    | -31.8                    | -14.1                    | -31.7                    |
|  | 16.2                     | -1.4                     | 17.1                     | -0.4                     | 18.3                     | 1.8                      | 13.5                     | -4.8                     | 15.6                     | 0.5                      |

**Table S6.** Calculated energies (kcal mol<sup>-1</sup>) for the deprotonation of *N*-aryl substituted imidazolium cations and various carbenes.

| Entry | Reaction                                                                            | R = Mes                  |                          | R = Dipp                 |                          |
|-------|-------------------------------------------------------------------------------------|--------------------------|--------------------------|--------------------------|--------------------------|
|       |                                                                                     | $\Delta H^{\circ}_{298}$ | $\Delta G^{\circ}_{298}$ | $\Delta H^{\circ}_{298}$ | $\Delta G^{\circ}_{298}$ |
| 1     |    | -12.1                    | -31.8                    | -14.1                    | -31.7                    |
| 2     |    | 13.5                     | -4.8                     | 15.6                     | 0.5                      |
| 3     |    | 0.2                      | -21.1                    | -2.2                     | -19.8                    |
| 4     |   | -19.1                    | -24.5                    | -21.8                    | -26.1                    |
| 5     |  | 4.3                      | -0.1                     | 2.0                      | -5.1                     |
| 6     |  | -9.0                     | -14.3                    | -8.3                     | -15.4                    |
| 7     |  | 2.0                      | -3.0                     | 0.8                      | -7.1                     |



**Figure S9.** PES scan for the addition of second molecule of furfural (stage from **IMes-III-B** to **IMes-VI-B**).



**Figure S10.** PES scan for the elimination of NHC (stage from **IMes-V-B** to **VI....IMes-I(H)-B**).

**Table S7.** Fukui indices ( $\bar{e}$ ) for **IMes-III-A**.

| Atom  | $f_w^+$ | $f_w^-$ | $f_w^0 = f_w^+ + f_w^-$ | $f_w^{DD} = f_w^+ - f_w^-$ |
|-------|---------|---------|-------------------------|----------------------------|
| 1(C)  | 0.04798 | 0.06187 | 0.05493                 | -0.01389                   |
| 2(C)  | 0.00848 | 0.06086 | 0.03467                 | -0.05238                   |
| 3(H)  | 0.00161 | 0.00623 | 0.00392                 | -0.00462                   |
| 4(C)  | 0.01090 | 0.06279 | 0.03684                 | -0.05189                   |
| 5(H)  | 0.00220 | 0.00650 | 0.00435                 | -0.00430                   |
| 6(N)  | 0.02259 | 0.08053 | 0.05156                 | -0.05794                   |
| 7(N)  | 0.02386 | 0.07857 | 0.05121                 | -0.05471                   |
| 8(C)  | 0.06799 | 0.00841 | 0.03820                 | 0.05959                    |
| 9(C)  | 0.02750 | 0.00378 | 0.01564                 | 0.02372                    |
| 10(C) | 0.05421 | 0.00425 | 0.02923                 | 0.04996                    |
| 11(C) | 0.04597 | 0.00084 | 0.02340                 | 0.04512                    |
| 12(C) | 0.02622 | 0.00104 | 0.01363                 | 0.02517                    |
| 13(C) | 0.07604 | 0.00102 | 0.03853                 | 0.07501                    |
| 14(H) | 0.00743 | 0.00021 | 0.00382                 | 0.00722                    |
| 15(H) | 0.00283 | 0.00033 | 0.00158                 | 0.00250                    |
| 16(C) | 0.06335 | 0.00842 | 0.03588                 | 0.05493                    |
| 17(C) | 0.03913 | 0.00320 | 0.02117                 | 0.03593                    |
| 18(C) | 0.02960 | 0.00404 | 0.01682                 | 0.02556                    |
| 19(C) | 0.02661 | 0.00062 | 0.01362                 | 0.02599                    |
| 20(C) | 0.03392 | 0.00095 | 0.01744                 | 0.03297                    |
| 21(C) | 0.07023 | 0.00046 | 0.03535                 | 0.06977                    |
| 22(H) | 0.00321 | 0.00020 | 0.00170                 | 0.00301                    |
| 23(H) | 0.00518 | 0.00032 | 0.00275                 | 0.00486                    |
| 24(C) | 0.00625 | 0.00253 | 0.00439                 | 0.00371                    |
| 25(H) | 0.00302 | 0.00372 | 0.00337                 | -0.00070                   |
| 26(H) | 0.00242 | 0.00121 | 0.00181                 | 0.00121                    |
| 27(H) | 0.00141 | 0.00028 | 0.00085                 | 0.00113                    |
| 28(C) | 0.00765 | 0.00087 | 0.00426                 | 0.00679                    |
| 29(H) | 0.00365 | 0.00092 | 0.00228                 | 0.00273                    |
| 30(H) | 0.00307 | 0.00024 | 0.00165                 | 0.00282                    |
| 31(H) | 0.00122 | 0.00004 | 0.00063                 | 0.00119                    |
| 32(C) | 0.00559 | 0.00102 | 0.00331                 | 0.00457                    |
| 33(H) | 0.00268 | 0.00090 | 0.00179                 | 0.00177                    |
| 34(H) | 0.00166 | 0.00051 | 0.00109                 | 0.00115                    |
| 35(H) | 0.00163 | 0.00005 | 0.00084                 | 0.00158                    |
| 36(C) | 0.01032 | 0.00266 | 0.00649                 | 0.00765                    |
| 37(H) | 0.00512 | 0.00335 | 0.00424                 | 0.00177                    |
| 38(H) | 0.00400 | 0.00107 | 0.00253                 | 0.00292                    |
| 39(H) | 0.00135 | 0.00039 | 0.00087                 | 0.00096                    |
| 40(C) | 0.01324 | 0.00019 | 0.00672                 | 0.01305                    |

|       |         |         |         |          |
|-------|---------|---------|---------|----------|
| 41(H) | 0.00981 | 0.00015 | 0.00498 | 0.00966  |
| 42(H) | 0.00271 | 0.00003 | 0.00137 | 0.00268  |
| 43(H) | 0.00327 | 0.00005 | 0.00166 | 0.00322  |
| 44(C) | 0.01210 | 0.00008 | 0.00609 | 0.01203  |
| 45(H) | 0.00863 | 0.00004 | 0.00433 | 0.00859  |
| 46(H) | 0.00313 | 0.00001 | 0.00157 | 0.00312  |
| 47(H) | 0.00243 | 0.00003 | 0.00123 | 0.00240  |
| 48(C) | 0.02350 | 0.21413 | 0.11881 | -0.19064 |
| 49(O) | 0.00765 | 0.04686 | 0.02725 | -0.03921 |
| 50(H) | 0.00146 | 0.00226 | 0.00186 | -0.00081 |
| 51(C) | 0.03155 | 0.04675 | 0.03915 | -0.01520 |
| 52(C) | 0.02520 | 0.09747 | 0.06134 | -0.07227 |
| 53(O) | 0.02163 | 0.02046 | 0.02104 | 0.00117  |
| 54(C) | 0.01328 | 0.03292 | 0.02310 | -0.01964 |
| 55(H) | 0.00358 | 0.01016 | 0.00687 | -0.00659 |
| 56(C) | 0.03105 | 0.08583 | 0.05844 | -0.05478 |
| 57(H) | 0.00148 | 0.00267 | 0.00207 | -0.00119 |
| 58(H) | 0.00684 | 0.00983 | 0.00833 | -0.00299 |
| 59(O) | 0.00105 | 0.00137 | 0.00121 | -0.00032 |
| 60(C) | 0.00051 | 0.00035 | 0.00043 | 0.00015  |
| 61(H) | 0.00007 | 0.00004 | 0.00005 | 0.00003  |
| 62(H) | 0.00052 | 0.00053 | 0.00053 | -0.00001 |
| 63(H) | 0.00023 | 0.00009 | 0.00016 | 0.00014  |
| 64(H) | 0.00348 | 0.01234 | 0.00791 | -0.00886 |

**Table S8.** Fukui indices ( $\bar{e}$ ) for **IMes-III-B**.

| Atom  | $f_w^+$ | $f_w^-$ | $f_w^0 = f_w^{++} + f_w^{--}$ | $f_w^{DD} = f_w^{+-} - f_w^{-+}$ |
|-------|---------|---------|-------------------------------|----------------------------------|
| 1(C)  | 0.04733 | 0.06160 | 0.05446                       | -0.01427                         |
| 2(C)  | 0.01633 | 0.12976 | 0.07305                       | -0.11343                         |
| 3(H)  | 0.00232 | 0.01518 | 0.00875                       | -0.01286                         |
| 4(C)  | 0.01562 | 0.05709 | 0.03635                       | -0.04147                         |
| 5(H)  | 0.00088 | 0.01121 | 0.00605                       | -0.01033                         |
| 6(N)  | 0.03402 | 0.02860 | 0.03131                       | 0.00541                          |
| 7(N)  | 0.03003 | 0.04183 | 0.03593                       | -0.01180                         |
| 8(C)  | 0.10704 | 0.00415 | 0.05559                       | 0.10289                          |
| 9(C)  | 0.06345 | 0.00180 | 0.03263                       | 0.06166                          |
| 10(C) | 0.05493 | 0.00194 | 0.02844                       | 0.05299                          |
| 11(C) | 0.04765 | 0.00039 | 0.02402                       | 0.04726                          |
| 12(C) | 0.05212 | 0.00046 | 0.02629                       | 0.05166                          |
| 13(C) | 0.12132 | 0.00042 | 0.06087                       | 0.12090                          |

|       |         |         |         |          |
|-------|---------|---------|---------|----------|
| 14(H) | 0.00599 | 0.00010 | 0.00305 | 0.00589  |
| 15(H) | 0.00724 | 0.00013 | 0.00368 | 0.00711  |
| 16(C) | 0.04931 | 0.00344 | 0.02638 | 0.04587  |
| 17(C) | 0.02422 | 0.00109 | 0.01265 | 0.02313  |
| 18(C) | 0.03513 | 0.00118 | 0.01816 | 0.03395  |
| 19(C) | 0.02735 | 0.00027 | 0.01381 | 0.02708  |
| 20(C) | 0.02014 | 0.00029 | 0.01021 | 0.01985  |
| 21(C) | 0.05161 | 0.00006 | 0.02583 | 0.05155  |
| 22(H) | 0.00420 | 0.00006 | 0.00213 | 0.00415  |
| 23(H) | 0.00221 | 0.00006 | 0.00113 | 0.00215  |
| 24(C) | 0.00641 | 0.00189 | 0.00415 | 0.00452  |
| 25(H) | 0.00361 | 0.00091 | 0.00226 | 0.00270  |
| 26(H) | 0.00267 | 0.00265 | 0.00266 | 0.00001  |
| 27(H) | 0.00123 | 0.00014 | 0.00068 | 0.00109  |
| 28(C) | 0.00577 | 0.00192 | 0.00384 | 0.00385  |
| 29(H) | 0.00158 | 0.00263 | 0.00210 | -0.00105 |
| 30(H) | 0.00514 | 0.00088 | 0.00301 | 0.00426  |
| 31(H) | 0.00127 | 0.00013 | 0.00070 | 0.00115  |
| 32(C) | 0.01172 | 0.00074 | 0.00623 | 0.01098  |
| 33(H) | 0.00609 | 0.00163 | 0.00386 | 0.00446  |
| 34(H) | 0.00386 | 0.00042 | 0.00214 | 0.00345  |
| 35(H) | 0.00200 | 0.00003 | 0.00101 | 0.00197  |
| 36(C) | 0.01273 | 0.00089 | 0.00681 | 0.01184  |
| 37(H) | 0.00915 | 0.00103 | 0.00509 | 0.00811  |
| 38(H) | 0.00385 | 0.00123 | 0.00254 | 0.00262  |
| 39(H) | 0.00264 | 0.00006 | 0.00135 | 0.00258  |
| 40(C) | 0.02034 | 0.00007 | 0.01021 | 0.02027  |
| 41(H) | 0.01385 | 0.00003 | 0.00694 | 0.01382  |
| 42(H) | 0.00345 | 0.00001 | 0.00173 | 0.00344  |
| 43(H) | 0.00602 | 0.00003 | 0.00302 | 0.00599  |
| 44(C) | 0.00883 | 0.00001 | 0.00442 | 0.00881  |
| 45(H) | 0.00587 | 0.00000 | 0.00294 | 0.00587  |
| 46(H) | 0.00139 | 0.00000 | 0.00069 | 0.00138  |
| 47(H) | 0.00290 | 0.00000 | 0.00145 | 0.00290  |
| 48(H) | 0.00942 | 0.00757 | 0.00849 | 0.00184  |
| 49(O) | 0.00208 | 0.00204 | 0.00206 | 0.00004  |
| 50(C) | 0.00072 | 0.00028 | 0.00050 | 0.00044  |
| 51(H) | 0.00023 | 0.00008 | 0.00016 | 0.00015  |
| 52(H) | 0.00017 | 0.00014 | 0.00015 | 0.00003  |
| 53(H) | 0.00051 | 0.00010 | 0.00030 | 0.00041  |
| 54(C) | 0.00498 | 0.22751 | 0.11624 | -0.22252 |
| 55(O) | 0.00292 | 0.04624 | 0.02458 | -0.04332 |
| 56(C) | 0.00285 | 0.04421 | 0.02353 | -0.04136 |

|       |         |         |         |          |
|-------|---------|---------|---------|----------|
| 57(C) | 0.00200 | 0.11567 | 0.05884 | -0.11366 |
| 58(O) | 0.00136 | 0.02363 | 0.01249 | -0.02227 |
| 59(C) | 0.00084 | 0.03255 | 0.01670 | -0.03171 |
| 60(H) | 0.00032 | 0.01362 | 0.00697 | -0.01330 |
| 61(C) | 0.00201 | 0.09395 | 0.04798 | -0.09195 |
| 62(H) | 0.00009 | 0.00242 | 0.00125 | -0.00232 |
| 63(H) | 0.00032 | 0.01133 | 0.00583 | -0.01102 |
| 64(H) | 0.00521 | 0.00018 | 0.00270 | 0.00503  |

**Table S9.** Fukui indexes ( $\bar{e}$ ) for **IMes-III-C**.

| Atom  | $f_w^+$ | $f_w^-$ | $f_w^0 = f_w^+ + f_w^-$ | $f_w^{DD} = f_w^+ - f_w^-$ |
|-------|---------|---------|-------------------------|----------------------------|
| 1(C)  | 0.00118 | 0.12125 | 0.06122                 | -0.12008                   |
| 2(C)  | 0.00058 | 0.04740 | 0.02399                 | -0.04682                   |
| 3(N)  | 0.00185 | 0.03472 | 0.01828                 | -0.03287                   |
| 4(C)  | 0.00218 | 0.03859 | 0.02039                 | -0.03641                   |
| 5(N)  | 0.00084 | 0.01554 | 0.00819                 | -0.01470                   |
| 6(H)  | 0.00022 | 0.01362 | 0.00692                 | -0.01340                   |
| 7(O)  | 0.00003 | 0.02418 | 0.01210                 | -0.02415                   |
| 8(C)  | 0.00017 | 0.23179 | 0.11598                 | -0.23162                   |
| 9(O)  | 0.00008 | 0.04531 | 0.02269                 | -0.04523                   |
| 10(H) | 0.00004 | 0.01112 | 0.00558                 | -0.01108                   |
| 11(C) | 0.00002 | 0.00361 | 0.00181                 | -0.00359                   |
| 12(H) | 0.00000 | 0.00172 | 0.00086                 | -0.00172                   |
| 13(H) | 0.00000 | 0.00197 | 0.00098                 | -0.00196                   |
| 14(H) | 0.00003 | 0.00052 | 0.00027                 | -0.00049                   |
| 15(H) | 0.00003 | 0.02626 | 0.01314                 | -0.02623                   |
| 16(C) | 0.00010 | 0.04542 | 0.02276                 | -0.04532                   |
| 17(C) | 0.00007 | 0.12211 | 0.06109                 | -0.12204                   |
| 18(O) | 0.00010 | 0.02552 | 0.01281                 | -0.02542                   |
| 19(C) | 0.00003 | 0.03406 | 0.01704                 | -0.03403                   |
| 20(H) | 0.00001 | 0.01441 | 0.00721                 | -0.01440                   |
| 21(C) | 0.00008 | 0.10013 | 0.05010                 | -0.10004                   |
| 22(H) | 0.00000 | 0.00256 | 0.00128                 | -0.00256                   |
| 23(H) | 0.00002 | 0.01228 | 0.00615                 | -0.01227                   |
| 24(C) | 0.01161 | 0.00420 | 0.00791                 | 0.00741                    |
| 25(C) | 0.00554 | 0.00201 | 0.00377                 | 0.00353                    |
| 26(C) | 0.00708 | 0.00199 | 0.00454                 | 0.00509                    |
| 27(C) | 0.00658 | 0.00040 | 0.00349                 | 0.00618                    |
| 28(C) | 0.00528 | 0.00042 | 0.00285                 | 0.00485                    |
| 29(C) | 0.01279 | 0.00093 | 0.00686                 | 0.01185                    |
| 30(H) | 0.00099 | 0.00007 | 0.00053                 | 0.00092                    |

|       |         |         |         |          |
|-------|---------|---------|---------|----------|
| 31(H) | 0.00068 | 0.00011 | 0.00039 | 0.00057  |
| 32(C) | 0.00222 | 0.00145 | 0.00184 | 0.00076  |
| 33(C) | 0.00077 | 0.00063 | 0.00070 | 0.00014  |
| 34(C) | 0.00211 | 0.00046 | 0.00129 | 0.00165  |
| 35(C) | 0.00186 | 0.00016 | 0.00101 | 0.00171  |
| 36(C) | 0.00079 | 0.00011 | 0.00045 | 0.00068  |
| 37(C) | 0.00231 | 0.00004 | 0.00118 | 0.00227  |
| 38(H) | 0.00034 | 0.00005 | 0.00019 | 0.00029  |
| 39(H) | 0.00007 | 0.00002 | 0.00005 | 0.00004  |
| 40(C) | 0.00019 | 0.00045 | 0.00032 | -0.00026 |
| 41(H) | 0.00012 | 0.00032 | 0.00022 | -0.00021 |
| 42(H) | 0.00006 | 0.00085 | 0.00045 | -0.00080 |
| 43(H) | 0.00006 | 0.00002 | 0.00004 | 0.00004  |
| 44(C) | 0.00041 | 0.00051 | 0.00046 | -0.00010 |
| 45(H) | 0.00022 | 0.00054 | 0.00038 | -0.00033 |
| 46(H) | 0.00019 | 0.00079 | 0.00049 | -0.00060 |
| 47(H) | 0.00004 | 0.00005 | 0.00005 | -0.00001 |
| 48(C) | 0.00044 | 0.00001 | 0.00023 | 0.00044  |
| 49(H) | 0.00024 | 0.00000 | 0.00012 | 0.00024  |
| 50(H) | 0.00027 | 0.00000 | 0.00014 | 0.00026  |
| 51(H) | 0.00004 | 0.00000 | 0.00002 | 0.00004  |
| 52(C) | 0.00113 | 0.00151 | 0.00132 | -0.00038 |
| 53(H) | 0.00037 | 0.00120 | 0.00079 | -0.00083 |
| 54(H) | 0.00060 | 0.00101 | 0.00081 | -0.00042 |
| 55(H) | 0.00027 | 0.00019 | 0.00023 | 0.00007  |
| 56(C) | 0.00141 | 0.00189 | 0.00165 | -0.00048 |
| 57(H) | 0.00050 | 0.00089 | 0.00070 | -0.00039 |
| 58(H) | 0.00080 | 0.00206 | 0.00143 | -0.00126 |
| 59(H) | 0.00026 | 0.00023 | 0.00025 | 0.00002  |
| 60(C) | 0.00225 | 0.00015 | 0.00120 | 0.00210  |
| 61(H) | 0.00159 | 0.00009 | 0.00084 | 0.00151  |
| 62(H) | 0.00047 | 0.00004 | 0.00025 | 0.00043  |
| 63(H) | 0.00059 | 0.00003 | 0.00031 | 0.00056  |

### 3. Optimized xyz-Cartesian coordinates.

[IMesH]<sup>+</sup> Etot = -923.903511504590 a.u.

|   |              |              |              |
|---|--------------|--------------|--------------|
| C | 0.000003000  | -0.000153000 | -0.148940000 |
| C | 0.677701000  | 0.001787000  | 1.936168000  |
| H | 1.387746000  | 0.002536000  | 2.745610000  |
| C | -0.677702000 | 0.001793000  | 1.936166000  |
| H | -1.387749000 | 0.002495000  | 2.745606000  |
| N | 1.082263000  | 0.000559000  | 0.622104000  |
| N | -1.082260000 | 0.000573000  | 0.622101000  |
| C | -2.445121000 | 0.000101000  | 0.154344000  |
| C | -3.076416000 | 1.226441000  | -0.049255000 |
| C | -3.075332000 | -1.226791000 | -0.050074000 |
| C | -4.395646000 | 1.194578000  | -0.481075000 |
| C | -4.394478000 | -1.195892000 | -0.481825000 |
| C | -5.070707000 | -0.000843000 | -0.705164000 |
| H | -4.911997000 | 2.134830000  | -0.643518000 |
| H | -4.909974000 | -2.136533000 | -0.644839000 |
| C | 2.445126000  | 0.000148000  | 0.154353000  |
| C | 3.076052000  | -1.226576000 | -0.048000000 |
| C | 3.075707000  | 1.226654000  | -0.051308000 |
| C | 4.395304000  | -1.195544000 | -0.479849000 |
| C | 4.394835000  | 1.194924000  | -0.483020000 |
| C | 5.070716000  | -0.000561000 | -0.705145000 |
| H | 4.911382000  | -2.136112000 | -0.641317000 |
| H | 4.910605000  | 2.135248000  | -0.647004000 |
| C | 2.374462000  | 2.530124000  | 0.182784000  |
| H | 1.510709000  | 2.651478000  | -0.477183000 |
| H | 2.013993000  | 2.621343000  | 1.210826000  |
| H | 3.049045000  | 3.363900000  | -0.005902000 |
| C | 2.375341000  | -2.529706000 | 0.189544000  |
| H | 2.015104000  | -2.618449000 | 1.217882000  |
| H | 1.511499000  | -2.653049000 | -0.469933000 |
| H | 3.050197000  | -3.363711000 | 0.002857000  |
| C | -2.376089000 | 2.530016000  | 0.186972000  |
| H | -2.016841000 | 2.620360000  | 1.215520000  |
| H | -1.511630000 | 2.652467000  | -0.471858000 |
| H | -3.050877000 | 3.363652000  | -0.001595000 |
| C | -2.373713000 | -2.529818000 | 0.185365000  |
| H | -1.510439000 | -2.651992000 | -0.475079000 |
| H | -2.012465000 | -2.619506000 | 1.213266000  |
| H | -3.048303000 | -3.363967000 | -0.001641000 |
| C | -6.483916000 | -0.001717000 | -1.196458000 |
| H | -6.507253000 | -0.015634000 | -2.290267000 |
| H | -7.027071000 | -0.880674000 | -0.847369000 |

|   |              |              |              |
|---|--------------|--------------|--------------|
| H | -7.020762000 | 0.889434000  | -0.869514000 |
| C | 6.483929000  | -0.000538000 | -1.196425000 |
| H | 6.507294000  | 0.014621000  | -2.290217000 |
| H | 7.027923000  | 0.877520000  | -0.846356000 |
| H | 7.019917000  | -0.892555000 | -0.870461000 |
| H | 0.000004000  | -0.001125000 | -1.226745000 |

**IMes-I-A**

Etot = -923.406887250205 a.u.

|   |              |              |              |
|---|--------------|--------------|--------------|
| C | -0.000003000 | -0.000582000 | -0.277228000 |
| C | 0.673950000  | 0.002333000  | 1.910466000  |
| H | 1.381805000  | 0.003381000  | 2.722671000  |
| C | -0.673940000 | 0.002312000  | 1.910471000  |
| H | -1.381788000 | 0.003328000  | 2.722683000  |
| N | 1.055655000  | 0.000563000  | 0.580087000  |
| N | -1.055656000 | 0.000550000  | 0.580097000  |
| C | -2.416842000 | 0.000090000  | 0.152611000  |
| C | -3.066429000 | 1.217261000  | -0.045278000 |
| C | -3.065041000 | -1.217645000 | -0.047245000 |
| C | -4.399184000 | 1.192043000  | -0.438845000 |
| C | -4.397686000 | -1.193398000 | -0.440786000 |
| C | -5.081999000 | -0.000866000 | -0.641530000 |
| H | -4.916031000 | 2.134442000  | -0.594107000 |
| H | -4.913403000 | -2.136184000 | -0.597548000 |
| C | 2.416844000  | 0.000109000  | 0.152614000  |
| C | 3.065976000  | -1.217463000 | -0.044215000 |
| C | 3.065502000  | 1.217441000  | -0.048295000 |
| C | 4.398747000  | -1.193065000 | -0.437820000 |
| C | 4.398136000  | 1.192374000  | -0.441782000 |
| C | 5.082008000  | -0.000593000 | -0.641511000 |
| H | 4.915258000  | -2.135784000 | -0.592242000 |
| H | 4.914189000  | 2.134839000  | -0.599377000 |
| C | 2.341103000  | 2.514971000  | 0.134762000  |
| H | 1.487456000  | 2.577347000  | -0.544870000 |
| H | 1.946726000  | 2.618262000  | 1.149038000  |
| H | 3.003893000  | 3.358211000  | -0.061244000 |
| C | 2.342309000  | -2.514784000 | 0.143186000  |
| H | 1.947872000  | -2.614848000 | 1.157758000  |
| H | 1.488779000  | -2.580007000 | -0.536326000 |
| H | 3.005614000  | -3.358304000 | -0.049857000 |
| C | -2.343203000 | 2.515010000  | 0.140908000  |
| H | -1.949644000 | 2.616633000  | 1.155669000  |
| H | -1.489124000 | 2.579493000  | -0.537982000 |
| H | -3.006537000 | 3.358106000  | -0.053877000 |
| C | -2.340209000 | -2.514750000 | 0.137061000  |
| H | -1.486952000 | -2.577774000 | -0.542999000 |

|   |              |              |              |
|---|--------------|--------------|--------------|
| H | -1.945194000 | -2.616573000 | 1.151236000  |
| H | -3.002903000 | -3.358415000 | -0.057438000 |
| C | -6.510012000 | -0.001663000 | -1.097889000 |
| H | -6.569491000 | -0.014930000 | -2.190692000 |
| H | -7.044840000 | -0.880068000 | -0.731942000 |
| H | -7.038959000 | 0.888780000  | -0.753345000 |
| C | 6.510027000  | -0.000664000 | -1.097849000 |
| H | 6.569539000  | 0.014006000  | -2.190633000 |
| H | 7.045754000  | 0.876719000  | -0.730748000 |
| H | 7.038051000  | -0.892093000 | -0.754458000 |

**IMes-I(H)-A**

Etot = -1039.061571616990 a.u.

|   |              |              |              |
|---|--------------|--------------|--------------|
| C | -1.795898000 | 0.449182000  | -0.210980000 |
| C | -2.492429000 | 2.274637000  | -1.375880000 |
| H | -3.197762000 | 3.010479000  | -1.723669000 |
| C | -1.187017000 | 2.093176000  | -1.660575000 |
| N | -2.838160000 | 1.268097000  | -0.493993000 |
| N | -0.786712000 | 0.982905000  | -0.940937000 |
| C | 0.543928000  | 0.462663000  | -0.963766000 |
| C | 1.529372000  | 1.107374000  | -0.213035000 |
| C | 0.823188000  | -0.667823000 | -1.728699000 |
| C | 2.821125000  | 0.602079000  | -0.257770000 |
| C | 2.134285000  | -1.135132000 | -1.740092000 |
| C | 3.145138000  | -0.515544000 | -1.019687000 |
| H | 3.594030000  | 1.090960000  | 0.327982000  |
| H | 2.365779000  | -2.015929000 | -2.331103000 |
| C | -4.146117000 | 1.116743000  | 0.060967000  |
| C | -5.000068000 | 0.142675000  | -0.456515000 |
| C | -4.534244000 | 1.958462000  | 1.103336000  |
| C | -6.272952000 | 0.039085000  | 0.092775000  |
| C | -5.816808000 | 1.814505000  | 1.618051000  |
| C | -6.700561000 | 0.861662000  | 1.127124000  |
| H | -6.949572000 | -0.711823000 | -0.304031000 |
| H | -6.129715000 | 2.463325000  | 2.430608000  |
| C | -3.594381000 | 2.977121000  | 1.673057000  |
| H | -2.640019000 | 2.520628000  | 1.946461000  |
| H | -3.372524000 | 3.774066000  | 0.958056000  |
| H | -4.023331000 | 3.437048000  | 2.563615000  |
| C | -4.565161000 | -0.785880000 | -1.546779000 |
| H | -4.031516000 | -0.258996000 | -2.340745000 |
| H | -3.889272000 | -1.548986000 | -1.148599000 |
| H | -5.428003000 | -1.287479000 | -1.986603000 |
| C | 1.202557000  | 2.293579000  | 0.642212000  |
| H | 0.912096000  | 3.161106000  | 0.043470000  |
| H | 0.366996000  | 2.075385000  | 1.311799000  |

|   |              |              |              |
|---|--------------|--------------|--------------|
| H | 2.063533000  | 2.577789000  | 1.247600000  |
| C | -0.245313000 | -1.387991000 | -2.490195000 |
| H | -0.862036000 | -1.982401000 | -1.808953000 |
| H | -0.909322000 | -0.695809000 | -3.012164000 |
| H | 0.197780000  | -2.060374000 | -3.225814000 |
| C | 4.553515000  | -1.026969000 | -1.064741000 |
| H | 4.988030000  | -1.080826000 | -0.063842000 |
| H | 4.600765000  | -2.021937000 | -1.509307000 |
| H | 5.191754000  | -0.366368000 | -1.659286000 |
| C | -8.068343000 | 0.702146000  | 1.719229000  |
| H | -8.070220000 | -0.075639000 | 2.489161000  |
| H | -8.410959000 | 1.626847000  | 2.186693000  |
| H | -8.798422000 | 0.410604000  | 0.961713000  |
| H | -1.927678000 | -1.344659000 | 0.290457000  |
| H | -0.520386000 | 2.638215000  | -2.307447000 |
| O | -2.052005000 | -2.324504000 | 0.378351000  |
| C | -1.880480000 | -2.677034000 | 1.723326000  |
| H | -2.749027000 | -3.238978000 | 2.087169000  |
| H | -0.992597000 | -3.308772000 | 1.857239000  |
| H | -1.760633000 | -1.794886000 | 2.364188000  |

**IMes-TS1-A**  $\nu_{198}$  cm<sup>-1</sup> Etot = -1382.160342678691 a.u.

|   |              |              |              |
|---|--------------|--------------|--------------|
| H | -1.133283000 | 4.105039000  | 0.521818000  |
| C | -2.035729000 | 2.195176000  | 1.176918000  |
| C | -1.207888000 | 3.030687000  | 0.518599000  |
| N | -1.684356000 | 0.916042000  | 0.787231000  |
| C | -0.666327000 | 0.927595000  | -0.099961000 |
| N | -0.379505000 | 2.236553000  | -0.252078000 |
| H | -2.832443000 | 2.387973000  | 1.875336000  |
| H | 2.120333000  | -0.506783000 | 1.428574000  |
| O | 2.207038000  | -0.564833000 | 2.409366000  |
| C | 0.669639000  | -0.734008000 | -0.534358000 |
| O | 1.807629000  | -0.356121000 | -0.223873000 |
| C | 0.613782000  | 2.770334000  | -1.135199000 |
| C | 1.861790000  | 3.120188000  | -0.621570000 |
| C | 0.281735000  | 2.958805000  | -2.475066000 |
| C | 2.788824000  | 3.667130000  | -1.499947000 |
| C | 1.244890000  | 3.508720000  | -3.312054000 |
| C | 2.503971000  | 3.863652000  | -2.845506000 |
| H | 3.766815000  | 3.942228000  | -1.117080000 |
| H | 1.000030000  | 3.664935000  | -4.358359000 |
| C | -2.352540000 | -0.265680000 | 1.238879000  |
| C | -3.320167000 | -0.839604000 | 0.412886000  |
| C | -2.041258000 | -0.790333000 | 2.494063000  |
| C | -3.965942000 | -1.983951000 | 0.863760000  |

|   |              |              |              |
|---|--------------|--------------|--------------|
| C | -2.722373000 | -1.933811000 | 2.899358000  |
| C | -3.676991000 | -2.549266000 | 2.100393000  |
| H | -4.723687000 | -2.438998000 | 0.233055000  |
| H | -2.493560000 | -2.353997000 | 3.873931000  |
| C | 3.540075000  | 4.420718000  | -3.774219000 |
| H | 4.201782000  | 3.627567000  | -4.135872000 |
| H | 3.082772000  | 4.890418000  | -4.646758000 |
| H | 4.166057000  | 5.162464000  | -3.274365000 |
| C | 2.206442000  | 2.901418000  | 0.817732000  |
| H | 1.485343000  | 3.376810000  | 1.487486000  |
| H | 2.216638000  | 1.835570000  | 1.057185000  |
| H | 3.192707000  | 3.309330000  | 1.039856000  |
| C | -1.002367000 | -0.173004000 | 3.377596000  |
| H | 0.011186000  | -0.355351000 | 3.003287000  |
| H | -1.123811000 | 0.909304000  | 3.457134000  |
| H | -1.064055000 | -0.594337000 | 4.381629000  |
| C | -3.662889000 | -0.241384000 | -0.917081000 |
| H | -3.929390000 | 0.814666000  | -0.824541000 |
| H | -2.816938000 | -0.298342000 | -1.607052000 |
| H | -4.506052000 | -0.766534000 | -1.366600000 |
| C | -4.365056000 | -3.801762000 | 2.552113000  |
| H | -3.802818000 | -4.687272000 | 2.239778000  |
| H | -4.451917000 | -3.838293000 | 3.639399000  |
| H | -5.366145000 | -3.883267000 | 2.124945000  |
| C | -1.065114000 | 2.576716000  | -3.007577000 |
| H | -1.200013000 | 1.491910000  | -2.993786000 |
| H | -1.873892000 | 3.008594000  | -2.412560000 |
| H | -1.180649000 | 2.918075000  | -4.036622000 |
| H | 0.057219000  | -1.334193000 | 0.158660000  |
| C | 0.309500000  | -1.001606000 | -1.938070000 |
| C | -0.587634000 | -1.867771000 | -2.484066000 |
| O | 1.000197000  | -0.377108000 | -2.916415000 |
| C | -0.441433000 | -1.758203000 | -3.895837000 |
| H | -1.258179000 | -2.512972000 | -1.938003000 |
| C | 0.535002000  | -0.838693000 | -4.093627000 |
| H | -0.978885000 | -2.297256000 | -4.659667000 |
| H | 0.995540000  | -0.429292000 | -4.977624000 |
| C | 3.308246000  | -1.372032000 | 2.721114000  |
| H | 4.250554000  | -0.960816000 | 2.334447000  |
| H | 3.391041000  | -1.432334000 | 3.809228000  |
| H | 3.202981000  | -2.394926000 | 2.334093000  |

**IMes-II-A**

Etot = -1382.186706583253 a.u.

|   |              |              |              |
|---|--------------|--------------|--------------|
| C | -0.527010000 | -0.450921000 | -0.138198000 |
| C | -1.221480000 | -2.294697000 | -1.176261000 |

|   |              |              |              |
|---|--------------|--------------|--------------|
| H | -1.933254000 | -2.956746000 | -1.637631000 |
| C | 0.103516000  | -2.417050000 | -0.959703000 |
| H | 0.793273000  | -3.208592000 | -1.195630000 |
| N | -1.595653000 | -1.068292000 | -0.668500000 |
| N | 0.521982000  | -1.269282000 | -0.321890000 |
| C | 1.888734000  | -1.037670000 | 0.056298000  |
| C | 2.739299000  | -0.467380000 | -0.896607000 |
| C | 2.330990000  | -1.441606000 | 1.311455000  |
| C | 4.062946000  | -0.269899000 | -0.543066000 |
| C | 3.672527000  | -1.212839000 | 1.613968000  |
| C | 4.545627000  | -0.624865000 | 0.714584000  |
| H | 4.736038000  | 0.179107000  | -1.266873000 |
| H | 4.033340000  | -1.503898000 | 2.595460000  |
| C | -2.941549000 | -0.572577000 | -0.683062000 |
| C | -3.777490000 | -0.882683000 | 0.389428000  |
| C | -3.367191000 | 0.172734000  | -1.781061000 |
| C | -5.087396000 | -0.422536000 | 0.327771000  |
| C | -4.686609000 | 0.606632000  | -1.790971000 |
| C | -5.559342000 | 0.320905000  | -0.747375000 |
| H | -5.755637000 | -0.649817000 | 1.152396000  |
| H | -5.038726000 | 1.188369000  | -2.637125000 |
| C | -2.431642000 | 0.524966000  | -2.896564000 |
| H | -1.641717000 | 1.196891000  | -2.547342000 |
| H | -1.942183000 | -0.358238000 | -3.314724000 |
| H | -2.968219000 | 1.027259000  | -3.701386000 |
| C | -3.274062000 | -1.650622000 | 1.570473000  |
| H | -2.927803000 | -2.647604000 | 1.281352000  |
| H | -2.426679000 | -1.123784000 | 2.028191000  |
| H | -4.063978000 | -1.771492000 | 2.311724000  |
| C | 2.245936000  | -0.084858000 | -2.258633000 |
| H | 1.857560000  | -0.949163000 | -2.805399000 |
| H | 1.442369000  | 0.652310000  | -2.199854000 |
| H | 3.055571000  | 0.346185000  | -2.847399000 |
| C | 1.454142000  | -2.099233000 | 2.329597000  |
| H | 1.369771000  | -1.458224000 | 3.211017000  |
| H | 0.443976000  | -2.273476000 | 1.966439000  |
| H | 1.892214000  | -3.052851000 | 2.637779000  |
| C | 5.972872000  | -0.357877000 | 1.084276000  |
| H | 6.118899000  | 0.701038000  | 1.317695000  |
| H | 6.271372000  | -0.933317000 | 1.961436000  |
| H | 6.650168000  | -0.605446000 | 0.263786000  |
| C | -6.968019000 | 0.831398000  | -0.765666000 |
| H | -7.027161000 | 1.816978000  | -0.293741000 |
| H | -7.341859000 | 0.934518000  | -1.785774000 |
| H | -7.639378000 | 0.167391000  | -0.218698000 |
| C | -0.630980000 | 0.781228000  | 0.752121000  |

|   |              |             |              |
|---|--------------|-------------|--------------|
| O | -0.664592000 | 0.300835000 | 2.001300000  |
| H | 0.315883000  | 0.592403000 | 3.236509000  |
| C | 0.432450000  | 1.804368000 | 0.457096000  |
| C | 1.425886000  | 2.341403000 | 1.203246000  |
| O | 0.373190000  | 2.420946000 | -0.758783000 |
| C | 2.029966000  | 3.350819000 | 0.393131000  |
| H | 1.680636000  | 2.043257000 | 2.209440000  |
| C | 1.356149000  | 3.354831000 | -0.778957000 |
| H | 2.854748000  | 3.994343000 | 0.656097000  |
| H | 1.441533000  | 3.935085000 | -1.683006000 |
| O | 0.919966000  | 0.716141000 | 4.023304000  |
| C | 0.210237000  | 1.376964000 | 5.028830000  |
| H | 0.872308000  | 1.518280000 | 5.888348000  |
| H | -0.143871000 | 2.368708000 | 4.711730000  |
| H | -0.665234000 | 0.806027000 | 5.370271000  |
| H | -1.583062000 | 1.260680000 | 0.422406000  |

**IMes-TS2-A**  $\nu_{361} \text{ cm}^{-1}$  Etot = -1382.154530777847

|   |                 |                 |                 |
|---|-----------------|-----------------|-----------------|
| C | -0.393455000000 | -0.295381000000 | 0.082781000000  |
| C | -1.203416000000 | -2.269081000000 | -0.561610000000 |
| H | -1.970557000000 | -2.988377000000 | -0.788779000000 |
| C | 0.137855000000  | -2.350658000000 | -0.608408000000 |
| H | 0.793801000000  | -3.153739000000 | -0.895639000000 |
| N | -1.526820000000 | -0.993580000000 | -0.137749000000 |
| N | 0.632425000000  | -1.125772000000 | -0.212322000000 |
| C | 2.021807000000  | -0.776816000000 | -0.283998000000 |
| C | 2.868242000000  | -1.156386000000 | 0.757593000000  |
| C | 2.485872000000  | -0.137573000000 | -1.435541000000 |
| C | 4.212823000000  | -0.828191000000 | 0.647875000000  |
| C | 3.841214000000  | 0.168092000000  | -1.489393000000 |
| C | 4.714728000000  | -0.154161000000 | -0.459187000000 |
| H | 4.885187000000  | -1.109392000000 | 1.452351000000  |
| H | 4.222714000000  | 0.668802000000  | -2.373653000000 |
| C | -2.902053000000 | -0.582768000000 | -0.028285000000 |
| C | -3.556570000000 | -0.746449000000 | 1.188661000000  |
| C | -3.547904000000 | -0.123077000000 | -1.174342000000 |
| C | -4.907291000000 | -0.431029000000 | 1.243664000000  |
| C | -4.900279000000 | 0.180231000000  | -1.063034000000 |
| C | -5.595516000000 | 0.036920000000  | 0.130704000000  |
| H | -5.433060000000 | -0.549297000000 | 2.186197000000  |
| H | -5.422065000000 | 0.544256000000  | -1.942665000000 |
| C | -2.816558000000 | 0.088717000000  | -2.462024000000 |
| H | -2.118816000000 | 0.935315000000  | -2.380687000000 |
| H | -2.235362000000 | -0.791156000000 | -2.751575000000 |
| H | -3.521559000000 | 0.303168000000  | -3.265850000000 |

|   |                 |                 |                 |
|---|-----------------|-----------------|-----------------|
| C | -2.824630000000 | -1.192553000000 | 2.415272000000  |
| H | -2.200606000000 | -2.070457000000 | 2.230935000000  |
| H | -2.170383000000 | -0.392008000000 | 2.772971000000  |
| H | -3.524603000000 | -1.435399000000 | 3.214968000000  |
| C | 2.359389000000  | -1.905072000000 | 1.949893000000  |
| H | 1.573576000000  | -1.343021000000 | 2.458817000000  |
| H | 1.941211000000  | -2.876236000000 | 1.670599000000  |
| H | 3.165548000000  | -2.080232000000 | 2.662176000000  |
| C | 1.583489000000  | 0.189856000000  | -2.583542000000 |
| H | 1.000604000000  | -0.683707000000 | -2.889853000000 |
| H | 0.864822000000  | 0.987186000000  | -2.345692000000 |
| H | 2.173076000000  | 0.514358000000  | -3.441295000000 |
| C | 6.161795000000  | 0.227199000000  | -0.532220000000 |
| H | 6.792752000000  | -0.497827000000 | -0.014805000000 |
| H | 6.502193000000  | 0.303837000000  | -1.566112000000 |
| H | 6.327977000000  | 1.200563000000  | -0.060204000000 |
| C | -7.044826000000 | 0.406680000000  | 0.224733000000  |
| H | -7.157763000000 | 1.452267000000  | 0.527528000000  |
| H | -7.549368000000 | 0.288816000000  | -0.735756000000 |
| H | -7.565892000000 | -0.204985000000 | 0.963599000000  |
| C | -0.272018000000 | 1.127648000000  | 0.416126000000  |
| O | -1.527516000000 | 1.711209000000  | 0.663471000000  |
| C | 0.726932000000  | 1.446964000000  | 1.463960000000  |
| H | -1.630317000000 | 2.252311000000  | -0.158619000000 |
| C | 0.798742000000  | 1.187456000000  | 2.797419000000  |
| O | 1.751705000000  | 2.267960000000  | 1.113235000000  |
| C | 1.938399000000  | 1.881901000000  | 3.292155000000  |
| H | 0.100152000000  | 0.592749000000  | 3.365005000000  |
| C | 2.473836000000  | 2.515733000000  | 2.221082000000  |
| H | 2.305665000000  | 1.912543000000  | 4.305645000000  |
| H | 3.332032000000  | 3.154914000000  | 2.095262000000  |
| H | -0.034581000000 | 1.691090000000  | -0.633189000000 |
| O | -0.670736000000 | 2.434046000000  | -1.707815000000 |
| C | -0.168260000000 | 3.682561000000  | -2.010115000000 |
| H | 0.288410000000  | 4.191585000000  | -1.140592000000 |
| H | 0.615281000000  | 3.649730000000  | -2.791280000000 |
| H | -0.950667000000 | 4.364054000000  | -2.388075000000 |

**IMes-III-A**

Etot = -1382.178302038680 a.u.

|   |              |              |              |
|---|--------------|--------------|--------------|
| C | -0.381303000 | -0.295151000 | -0.121930000 |
| C | -1.148420000 | -2.237324000 | -0.995525000 |
| H | -1.888505000 | -2.958547000 | -1.296099000 |
| C | 0.182396000  | -2.244451000 | -1.123072000 |
| H | 0.847748000  | -2.993256000 | -1.515764000 |
| N | -1.516056000 | -1.047437000 | -0.378251000 |

|   |              |              |              |
|---|--------------|--------------|--------------|
| N | 0.677164000  | -1.059338000 | -0.583861000 |
| C | 2.054025000  | -0.919784000 | -0.245008000 |
| C | 2.969455000  | -0.644997000 | -1.262528000 |
| C | 2.465840000  | -1.135657000 | 1.071582000  |
| C | 4.315722000  | -0.568222000 | -0.932335000 |
| C | 3.823495000  | -1.031858000 | 1.353911000  |
| C | 4.762169000  | -0.744641000 | 0.372022000  |
| H | 5.035125000  | -0.353820000 | -1.717195000 |
| H | 4.155246000  | -1.198637000 | 2.374415000  |
| C | -2.865340000 | -0.589935000 | -0.357012000 |
| C | -3.728141000 | -1.061463000 | 0.632716000  |
| C | -3.304640000 | 0.275269000  | -1.361059000 |
| C | -5.050406000 | -0.633240000 | 0.603675000  |
| C | -4.632294000 | 0.685780000  | -1.339157000 |
| C | -5.519947000 | 0.245808000  | -0.364297000 |
| H | -5.730946000 | -0.994554000 | 1.368781000  |
| H | -4.984541000 | 1.356480000  | -2.117499000 |
| C | -2.377420000 | 0.739730000  | -2.442379000 |
| H | -1.567804000 | 1.355290000  | -2.039757000 |
| H | -1.905164000 | -0.106109000 | -2.949596000 |
| H | -2.917047000 | 1.325751000  | -3.186846000 |
| C | -3.245626000 | -1.976232000 | 1.715230000  |
| H | -2.717697000 | -2.843769000 | 1.312995000  |
| H | -2.553020000 | -1.460425000 | 2.386346000  |
| H | -4.083796000 | -2.335490000 | 2.313117000  |
| C | 2.513646000  | -0.416205000 | -2.670309000 |
| H | 2.073512000  | -1.314761000 | -3.111639000 |
| H | 1.751122000  | 0.364946000  | -2.704885000 |
| H | 3.350859000  | -0.112308000 | -3.299635000 |
| C | 1.493252000  | -1.496497000 | 2.150002000  |
| H | 0.870248000  | -0.645695000 | 2.436823000  |
| H | 0.812466000  | -2.287286000 | 1.824708000  |
| H | 2.020265000  | -1.845109000 | 3.038617000  |
| C | 6.215481000  | -0.610135000 | 0.713002000  |
| H | 6.458787000  | 0.424693000  | 0.973631000  |
| H | 6.483000000  | -1.232671000 | 1.568784000  |
| H | 6.850873000  | -0.893234000 | -0.128274000 |
| C | -6.941411000 | 0.721681000  | -0.348204000 |
| H | -7.034092000 | 1.654404000  | 0.217002000  |
| H | -7.308382000 | 0.915517000  | -1.357927000 |
| H | -7.600990000 | -0.010320000 | 0.120976000  |
| C | -0.356822000 | 0.932910000  | 0.494667000  |
| O | -1.470909000 | 1.253725000  | 1.274934000  |
| H | -1.470691000 | 0.675085000  | 3.031811000  |
| C | 0.673654000  | 1.921878000  | 0.502338000  |
| C | 0.879428000  | 2.990048000  | 1.339221000  |

|   |              |             |              |
|---|--------------|-------------|--------------|
| O | 1.574272000  | 1.970922000 | -0.515541000 |
| C | 1.978972000  | 3.717079000 | 0.801155000  |
| H | 0.325610000  | 3.206409000 | 2.237934000  |
| C | 2.368919000  | 3.054808000 | -0.310447000 |
| H | 2.428543000  | 4.612910000 | 1.199717000  |
| H | 3.160016000  | 3.201320000 | -1.026035000 |
| O | -1.426548000 | 0.224824000 | 3.889716000  |
| C | -0.784834000 | 1.066080000 | 4.811964000  |
| H | -0.734300000 | 0.537791000 | 5.765901000  |
| H | 0.240438000  | 1.316662000 | 4.508626000  |
| H | -1.333844000 | 2.003334000 | 4.975573000  |
| H | -1.909323000 | 2.032268000 | 0.913994000  |

**IMes-IV-A**

Etot = -1725.290133585273 a.u.

|   |              |              |              |
|---|--------------|--------------|--------------|
| C | 0.582086000  | -1.575875000 | -0.379342000 |
| C | -0.486386000 | 0.379897000  | -0.313373000 |
| C | 0.792539000  | 0.602292000  | 0.038469000  |
| H | 1.309169000  | 1.500594000  | 0.328259000  |
| N | -0.614278000 | -0.967993000 | -0.564832000 |
| N | 1.440969000  | -0.608229000 | 0.001332000  |
| C | 2.812311000  | -0.684775000 | 0.455362000  |
| C | 3.844642000  | -0.437248000 | -0.440280000 |
| C | 3.027318000  | -0.870722000 | 1.822110000  |
| C | 5.141366000  | -0.423772000 | 0.065854000  |
| C | 4.338765000  | -0.848306000 | 2.270358000  |
| C | 5.410903000  | -0.637523000 | 1.408816000  |
| H | 5.962255000  | -0.238898000 | -0.619875000 |
| H | 4.527328000  | -1.004851000 | 3.327870000  |
| C | -1.946344000 | -1.502686000 | -0.760417000 |
| C | -2.522344000 | -1.515706000 | -2.026410000 |
| C | -2.668293000 | -1.846212000 | 0.392654000  |
| C | -3.832830000 | -1.977783000 | -2.132483000 |
| C | -3.969254000 | -2.292665000 | 0.224466000  |
| C | -4.563969000 | -2.387366000 | -1.030248000 |
| H | -4.291231000 | -2.004130000 | -3.116029000 |
| H | -4.534087000 | -2.578417000 | 1.105908000  |
| C | -2.065684000 | -1.763837000 | 1.759139000  |
| H | -1.265573000 | -2.507494000 | 1.886317000  |
| H | -1.635353000 | -0.776530000 | 1.951196000  |
| H | -2.827516000 | -1.949510000 | 2.515971000  |
| C | -1.820657000 | -1.053244000 | -3.265159000 |
| H | -1.066406000 | -0.292821000 | -3.058914000 |
| H | -1.323653000 | -1.888170000 | -3.764064000 |
| H | -2.542350000 | -0.628842000 | -3.964554000 |
| C | 3.607024000  | -0.211856000 | -1.900536000 |

|   |              |              |              |
|---|--------------|--------------|--------------|
| H | 3.351624000  | -1.148162000 | -2.403141000 |
| H | 2.786509000  | 0.486848000  | -2.083051000 |
| H | 4.502682000  | 0.192738000  | -2.372310000 |
| C | 1.894658000  | -1.107195000 | 2.770972000  |
| H | 1.201656000  | -0.260112000 | 2.789664000  |
| H | 1.316404000  | -1.994553000 | 2.493830000  |
| H | 2.271166000  | -1.248212000 | 3.783897000  |
| C | 6.818382000  | -0.658078000 | 1.921609000  |
| H | 6.898412000  | -0.153237000 | 2.886619000  |
| H | 7.161471000  | -1.687165000 | 2.064440000  |
| H | 7.504383000  | -0.175293000 | 1.224136000  |
| C | -5.956170000 | -2.918598000 | -1.176018000 |
| H | -5.961145000 | -4.008535000 | -1.082422000 |
| H | -6.615408000 | -2.524597000 | -0.399722000 |
| H | -6.380577000 | -2.667122000 | -2.148831000 |
| H | -1.332904000 | 1.039819000  | -0.388955000 |
| C | 0.998940000  | -3.043133000 | -0.563617000 |
| O | 2.137768000  | -3.264187000 | 0.186041000  |
| C | 1.297782000  | -3.285924000 | -2.007464000 |
| C | -0.107386000 | -4.001902000 | 0.143886000  |
| H | 1.677686000  | -3.644984000 | 1.020979000  |
| C | 1.220267000  | -2.533523000 | -3.137922000 |
| O | 1.837884000  | -4.486271000 | -2.302706000 |
| O | 0.226441000  | -3.962202000 | 1.453693000  |
| H | -1.091713000 | -3.574617000 | -0.090701000 |
| C | -0.121667000 | -5.383072000 | -0.427271000 |
| C | 1.728933000  | -3.339322000 | -4.199048000 |
| H | 0.871711000  | -1.517964000 | -3.210117000 |
| C | 2.086856000  | -4.511364000 | -3.625394000 |
| C | 0.335605000  | -6.572350000 | 0.033020000  |
| O | -0.756684000 | -5.555933000 | -1.617341000 |
| H | 1.821231000  | -3.076757000 | -5.240719000 |
| H | 2.516311000  | -5.423046000 | -4.005874000 |
| C | -0.025510000 | -7.543611000 | -0.947505000 |
| H | 0.836384000  | -6.730727000 | 0.974555000  |
| C | -0.679560000 | -6.871549000 | -1.923116000 |
| H | 0.167667000  | -8.604547000 | -0.921708000 |
| H | -1.143150000 | -7.171762000 | -2.848452000 |
| H | 0.123062000  | -5.189571000 | 2.628466000  |
| O | 0.199704000  | -5.836154000 | 3.369343000  |
| C | 1.030886000  | -5.278650000 | 4.340925000  |
| H | 2.037446000  | -5.047753000 | 3.959764000  |
| H | 0.618693000  | -4.353389000 | 4.772982000  |
| H | 1.143773000  | -6.000262000 | 5.155203000  |

**IMes-V-A**

Etot = -1725.295087097841 a.u.

|   |              |              |              |
|---|--------------|--------------|--------------|
| C | 0.338952000  | -1.457487000 | -0.138568000 |
| C | -0.691190000 | 0.524824000  | -0.055358000 |
| C | 0.621558000  | 0.741481000  | 0.136600000  |
| H | 1.178443000  | 1.645663000  | 0.310246000  |
| N | -0.856312000 | -0.834097000 | -0.228835000 |
| N | 1.246494000  | -0.479570000 | 0.079779000  |
| C | 2.673460000  | -0.582935000 | 0.247860000  |
| C | 3.484171000  | -0.375700000 | -0.868085000 |
| C | 3.191604000  | -0.747255000 | 1.533007000  |
| C | 4.859548000  | -0.440634000 | -0.683168000 |
| C | 4.573208000  | -0.809331000 | 1.656692000  |
| C | 5.421118000  | -0.678067000 | 0.564673000  |
| H | 5.506750000  | -0.300174000 | -1.543187000 |
| H | 4.992681000  | -0.975544000 | 2.643205000  |
| C | -2.179702000 | -1.344617000 | -0.473309000 |
| C | -2.616667000 | -1.465854000 | -1.792638000 |
| C | -3.015287000 | -1.572983000 | 0.616626000  |
| C | -3.925427000 | -1.877090000 | -2.002507000 |
| C | -4.316236000 | -1.982308000 | 0.349606000  |
| C | -4.786471000 | -2.150847000 | -0.945280000 |
| H | -4.280591000 | -1.985652000 | -3.022501000 |
| H | -4.977941000 | -2.182271000 | 1.186203000  |
| C | -2.557516000 | -1.355812000 | 2.024365000  |
| H | -1.546374000 | -1.730515000 | 2.181651000  |
| H | -2.565848000 | -0.291122000 | 2.280327000  |
| H | -3.220487000 | -1.868801000 | 2.720607000  |
| C | -1.712312000 | -1.182187000 | -2.952440000 |
| H | -1.193173000 | -0.226794000 | -2.844471000 |
| H | -0.946384000 | -1.956013000 | -3.056451000 |
| H | -2.281181000 | -1.156558000 | -3.881661000 |
| C | 2.916130000  | -0.039721000 | -2.212544000 |
| H | 3.700965000  | -0.049364000 | -2.968751000 |
| H | 2.149638000  | -0.753402000 | -2.516675000 |
| H | 2.465039000  | 0.957832000  | -2.213977000 |
| C | 2.315028000  | -0.804004000 | 2.742793000  |
| H | 1.891771000  | 0.183299000  | 2.959012000  |
| H | 1.499704000  | -1.512811000 | 2.591077000  |
| H | 2.888934000  | -1.127331000 | 3.609904000  |
| C | 6.904970000  | -0.799234000 | 0.732285000  |
| H | 7.247261000  | -0.284177000 | 1.632306000  |
| H | 7.195905000  | -1.849345000 | 0.831654000  |
| H | 7.439576000  | -0.385806000 | -0.124357000 |
| C | -6.180013000 | -2.637032000 | -1.201199000 |
| H | -6.186206000 | -3.720599000 | -1.353240000 |
| H | -6.838808000 | -2.420307000 | -0.359066000 |

|   |              |              |              |
|---|--------------|--------------|--------------|
| H | -6.604224000 | -2.179634000 | -2.097108000 |
| H | -1.531772000 | 1.195410000  | -0.089198000 |
| C | 0.694061000  | -2.971989000 | -0.026190000 |
| O | 1.005188000  | -3.159142000 | 1.262312000  |
| C | 1.808054000  | -3.282132000 | -1.007071000 |
| C | -0.563431000 | -3.906532000 | -0.358103000 |
| H | -0.542772000 | -3.801465000 | 1.483736000  |
| C | 1.880448000  | -3.320620000 | -2.365687000 |
| O | 2.979440000  | -3.691327000 | -0.480435000 |
| O | -1.275100000 | -3.989011000 | 0.835484000  |
| H | -1.188555000 | -3.468883000 | -1.141583000 |
| C | -0.151549000 | -5.255852000 | -0.844242000 |
| C | 3.190282000  | -3.777322000 | -2.688482000 |
| H | 1.086730000  | -3.092577000 | -3.059218000 |
| C | 3.807228000  | -3.985974000 | -1.501395000 |
| C | 0.440731000  | -6.322186000 | -0.252135000 |
| O | -0.424873000 | -5.543791000 | -2.143410000 |
| H | 3.608388000  | -3.941167000 | -3.668984000 |
| H | 4.790259000  | -4.330410000 | -1.227112000 |
| C | 0.548645000  | -7.330542000 | -1.254090000 |
| H | 0.760539000  | -6.373881000 | 0.775782000  |
| C | 0.010206000  | -6.802650000 | -2.377520000 |
| H | 0.968075000  | -8.318643000 | -1.149429000 |
| H | -0.140120000 | -7.179498000 | -3.375478000 |
| H | 2.410484000  | -3.706082000 | 2.152360000  |
| O | 3.110302000  | -3.963548000 | 2.790076000  |
| C | 3.290872000  | -5.346038000 | 2.713029000  |
| H | 2.394515000  | -5.907373000 | 3.017336000  |
| H | 3.569209000  | -5.680293000 | 1.703315000  |
| H | 4.100173000  | -5.625073000 | 3.393649000  |

**VI...IMes-I(H)-A**

Etot = -1725.297972868944a.u.

|   |              |              |              |
|---|--------------|--------------|--------------|
| C | -1.852282000 | 0.626239000  | -0.170397000 |
| C | -2.603389000 | 2.195411000  | -1.629824000 |
| H | -3.331070000 | 2.837764000  | -2.096109000 |
| C | -1.293137000 | 2.008854000  | -1.885726000 |
| N | -2.918861000 | 1.349916000  | -0.582926000 |
| N | -0.858693000 | 1.054253000  | -0.985178000 |
| C | 0.481710000  | 0.567323000  | -0.916893000 |
| C | 1.462438000  | 1.361278000  | -0.319847000 |
| C | 0.770233000  | -0.693556000 | -1.440762000 |
| C | 2.758350000  | 0.860048000  | -0.265977000 |
| C | 2.080801000  | -1.149976000 | -1.357026000 |
| C | 3.088512000  | -0.388053000 | -0.778433000 |
| H | 3.529524000  | 1.463935000  | 0.202580000  |

|   |              |              |              |
|---|--------------|--------------|--------------|
| H | 2.317797000  | -2.130114000 | -1.760194000 |
| C | -4.224956000 | 1.249848000  | -0.010754000 |
| C | -5.008556000 | 0.134847000  | -0.301353000 |
| C | -4.680378000 | 2.278634000  | 0.817040000  |
| C | -6.282095000 | 0.071377000  | 0.254556000  |
| C | -5.960682000 | 2.167783000  | 1.343492000  |
| C | -6.775746000 | 1.073494000  | 1.077390000  |
| H | -6.903944000 | -0.790741000 | 0.033200000  |
| H | -6.326734000 | 2.960117000  | 1.989664000  |
| C | -3.815902000 | 3.452493000  | 1.161258000  |
| H | -2.904401000 | 3.141818000  | 1.680853000  |
| H | -3.505018000 | 4.007388000  | 0.272459000  |
| H | -4.356468000 | 4.140866000  | 1.811837000  |
| C | -4.505031000 | -0.979200000 | -1.166270000 |
| H | -4.001805000 | -0.603879000 | -2.060021000 |
| H | -3.783609000 | -1.595028000 | -0.622053000 |
| H | -5.329826000 | -1.620327000 | -1.479688000 |
| C | 1.137801000  | 2.697779000  | 0.273405000  |
| H | 0.711294000  | 3.378120000  | -0.467904000 |
| H | 0.410179000  | 2.617617000  | 1.086473000  |
| H | 2.039358000  | 3.162222000  | 0.674302000  |
| C | -0.295134000 | -1.544998000 | -2.060374000 |
| H | -0.996205000 | -1.907659000 | -1.303578000 |
| H | -0.879919000 | -0.985238000 | -2.794122000 |
| H | 0.147363000  | -2.407409000 | -2.559889000 |
| C | 4.500796000  | -0.888940000 | -0.732776000 |
| H | 5.048190000  | -0.458074000 | 0.107534000  |
| H | 4.536051000  | -1.976493000 | -0.644146000 |
| H | 5.039880000  | -0.619817000 | -1.646539000 |
| C | -8.141868000 | 0.971621000  | 1.686025000  |
| H | -8.077789000 | 0.693019000  | 2.742256000  |
| H | -8.672969000 | 1.924773000  | 1.634589000  |
| H | -8.746771000 | 0.216608000  | 1.181603000  |
| H | -0.643798000 | 2.455918000  | -2.619298000 |
| H | -1.873132000 | -0.823189000 | 0.929443000  |
| O | -1.901761000 | -1.723040000 | 1.384692000  |
| C | -0.720894000 | -1.932132000 | 2.066817000  |
| C | -0.389420000 | -0.752541000 | 3.003787000  |
| H | 0.144180000  | -2.058642000 | 1.393957000  |
| C | -0.842313000 | -3.178646000 | 2.881994000  |
| O | -1.239260000 | 0.051797000  | 3.320780000  |
| C | 0.984951000  | -0.643125000 | 3.479736000  |
| C | -1.874697000 | -3.708455000 | 3.581930000  |
| O | 0.250493000  | -3.974114000 | 2.986714000  |
| C | 2.130623000  | -1.339618000 | 3.215325000  |
| O | 1.256369000  | 0.358561000  | 4.357776000  |

|   |              |              |             |
|---|--------------|--------------|-------------|
| C | -1.385274000 | -4.917796000 | 4.157567000 |
| H | -2.862154000 | -3.283792000 | 3.656234000 |
| C | -0.094408000 | -5.025234000 | 3.767496000 |
| C | 3.157370000  | -0.730648000 | 3.975848000 |
| H | 2.220181000  | -2.189851000 | 2.559714000 |
| C | 2.561055000  | 0.291496000  | 4.644703000 |
| H | -1.925417000 | -5.615616000 | 4.777416000 |
| H | 0.676317000  | -5.756672000 | 3.944043000 |
| H | 4.197351000  | -1.010266000 | 4.023890000 |
| H | 2.932623000  | 1.028817000  | 5.338037000 |
| O | -0.944808000 | 2.834988000  | 3.162637000 |
| C | -0.809267000 | 3.474532000  | 4.404619000 |
| H | -1.060190000 | 1.883151000  | 3.317451000 |
| H | -1.702531000 | 3.359112000  | 5.032010000 |
| H | 0.055382000  | 3.104070000  | 4.970321000 |
| H | -0.662188000 | 4.540327000  | 4.217971000 |

**VI** Etot = -686.227229359367 a.u.

|   |              |              |              |
|---|--------------|--------------|--------------|
| C | -0.322889000 | 0.283390000  | 0.276329000  |
| C | 0.367040000  | -0.981073000 | 0.021926000  |
| C | -0.050287000 | -2.211208000 | -0.404561000 |
| O | 1.705419000  | -1.005581000 | 0.236292000  |
| C | 1.102237000  | -3.032929000 | -0.451376000 |
| H | -1.061286000 | -2.497257000 | -0.646053000 |
| C | 2.131839000  | -2.240870000 | -0.052443000 |
| H | 1.162284000  | -4.068981000 | -0.742769000 |
| H | 3.188470000  | -2.417551000 | 0.067775000  |
| O | 0.256387000  | 1.280651000  | 0.620664000  |
| C | -1.852216000 | 0.247850000  | 0.110150000  |
| H | -2.093916000 | -0.414134000 | -0.732379000 |
| O | -2.284554000 | 1.558570000  | -0.136507000 |
| H | -3.199096000 | 1.626666000  | 0.149061000  |
| C | -2.460203000 | -0.346685000 | 1.335234000  |
| C | -2.511574000 | 0.061000000  | 2.629470000  |
| O | -3.114721000 | -1.527655000 | 1.194684000  |
| C | -3.250176000 | -0.933638000 | 3.332294000  |
| H | -2.066265000 | 0.960300000  | 3.024575000  |
| C | -3.583439000 | -1.871369000 | 2.414904000  |
| H | -3.495312000 | -0.949138000 | 4.382107000  |
| H | -4.131805000 | -2.797087000 | 2.467775000  |

**IMes-I(H2)-B** Etot = -1154.185637114467

|   |                 |                 |                |
|---|-----------------|-----------------|----------------|
| C | -0.276715000000 | -0.567668000000 | 0.295649000000 |
|---|-----------------|-----------------|----------------|

|   |                 |                 |                 |
|---|-----------------|-----------------|-----------------|
| C | -0.711310000000 | 1.493048000000  | -0.558582000000 |
| H | -1.368378000000 | 2.281508000000  | -0.894392000000 |
| C | 0.648104000000  | 1.418919000000  | -0.564338000000 |
| H | 1.857265000000  | 2.622444000000  | -0.890020000000 |
| N | -1.249959000000 | 0.304736000000  | -0.038058000000 |
| N | 0.847342000000  | 0.129406000000  | -0.023460000000 |
| C | 2.141488000000  | -0.423184000000 | 0.170547000000  |
| C | 2.990089000000  | 0.133272000000  | 1.132013000000  |
| C | 2.560004000000  | -1.502438000000 | -0.611925000000 |
| C | 4.251088000000  | -0.424773000000 | 1.309320000000  |
| C | 3.831128000000  | -2.026762000000 | -0.398770000000 |
| C | 4.689807000000  | -1.508091000000 | 0.560005000000  |
| H | 4.910047000000  | 0.007966000000  | 2.057799000000  |
| H | 4.159228000000  | -2.861594000000 | -1.012993000000 |
| C | -2.633680000000 | 0.058312000000  | 0.133407000000  |
| C | -3.294886000000 | -0.833972000000 | -0.713869000000 |
| C | -3.327502000000 | 0.740663000000  | 1.137747000000  |
| C | -4.663252000000 | -1.018990000000 | -0.543051000000 |
| C | -4.694179000000 | 0.525765000000  | 1.269264000000  |
| C | -5.381563000000 | -0.350379000000 | 0.438516000000  |
| H | -5.181042000000 | -1.708783000000 | -1.204398000000 |
| H | -5.233288000000 | 1.054154000000  | 2.051435000000  |
| C | -2.606181000000 | 1.657562000000  | 2.077122000000  |
| H | -1.752341000000 | 1.147481000000  | 2.530089000000  |
| H | -2.200712000000 | 2.531100000000  | 1.561563000000  |
| H | -3.274044000000 | 1.999147000000  | 2.870203000000  |
| C | -2.553196000000 | -1.589161000000 | -1.771736000000 |
| H | -1.832550000000 | -0.948523000000 | -2.283656000000 |
| H | -1.988700000000 | -2.413690000000 | -1.327397000000 |
| H | -3.248369000000 | -2.001062000000 | -2.506573000000 |
| C | 2.566475000000  | 1.313038000000  | 1.948857000000  |
| H | 2.565391000000  | 2.218131000000  | 1.334577000000  |
| H | 1.550096000000  | 1.184958000000  | 2.327666000000  |
| H | 3.244817000000  | 1.456330000000  | 2.793207000000  |
| C | 1.676962000000  | -2.083890000000 | -1.672713000000 |
| H | 0.893053000000  | -2.706237000000 | -1.232060000000 |
| H | 1.180853000000  | -1.294068000000 | -2.240819000000 |
| H | 2.263711000000  | -2.697564000000 | -2.360253000000 |
| C | 6.043181000000  | -2.112711000000 | 0.794988000000  |
| H | 6.004916000000  | -2.886692000000 | 1.569497000000  |
| H | 6.432007000000  | -2.580581000000 | -0.112643000000 |
| H | 6.763788000000  | -1.359746000000 | 1.123186000000  |
| C | -6.850991000000 | -0.593268000000 | 0.621227000000  |
| H | -7.033193000000 | -1.377337000000 | 1.363985000000  |
| H | -7.364543000000 | 0.307125000000  | 0.966889000000  |
| H | -7.319429000000 | -0.914069000000 | -0.311910000000 |

|   |                 |                 |                 |
|---|-----------------|-----------------|-----------------|
| O | 2.509751000000  | 3.419797000000  | -0.968381000000 |
| C | 1.740421000000  | 4.569787000000  | -1.048786000000 |
| H | 2.311166000000  | 5.431676000000  | -0.675769000000 |
| H | 1.430155000000  | 4.811921000000  | -2.081850000000 |
| H | 0.819579000000  | 4.500745000000  | -0.446759000000 |
| H | -0.530044000000 | -2.316246000000 | 0.651941000000  |
| O | -0.661719000000 | -3.318062000000 | 0.737503000000  |
| C | 0.109574000000  | -3.762601000000 | 1.808149000000  |
| H | -0.227150000000 | -3.352609000000 | 2.774159000000  |
| H | 0.033664000000  | -4.854243000000 | 1.871160000000  |
| H | 1.175247000000  | -3.508813000000 | 1.699677000000  |

**IMes-I-B**

Etot = --922.867346068235a.u.

|   |              |              |              |
|---|--------------|--------------|--------------|
| C | -0.014727000 | -0.000178000 | -0.278469000 |
| C | 0.649041000  | 0.000884000  | 1.898187000  |
| H | 1.397530000  | 0.001190000  | 2.678780000  |
| C | -0.715533000 | 0.001071000  | 1.979988000  |
| N | 1.049461000  | 0.000134000  | 0.553717000  |
| N | -1.052078000 | 0.000392000  | 0.605085000  |
| C | -2.403365000 | 0.000108000  | 0.159092000  |
| C | -3.063613000 | 1.214319000  | -0.045133000 |
| C | -3.062718000 | -1.214560000 | -0.046187000 |
| C | -4.392158000 | 1.191760000  | -0.460604000 |
| C | -4.391151000 | -1.192751000 | -0.461632000 |
| C | -5.074068000 | -0.000621000 | -0.677995000 |
| H | -4.908133000 | 2.135624000  | -0.614609000 |
| H | -4.906329000 | -2.136936000 | -0.616411000 |
| C | 2.403261000  | -0.000080000 | 0.121264000  |
| C | 3.064824000  | -1.216365000 | -0.068345000 |
| C | 3.063900000  | 1.216257000  | -0.072310000 |
| C | 4.399217000  | -1.193053000 | -0.462975000 |
| C | 4.398157000  | 1.192835000  | -0.466853000 |
| C | 5.083521000  | -0.000224000 | -0.670711000 |
| H | 4.917777000  | -2.136574000 | -0.608629000 |
| H | 4.915877000  | 2.136355000  | -0.615556000 |
| C | 2.354592000  | 2.519524000  | 0.135473000  |
| H | 1.510696000  | 2.620769000  | -0.552343000 |
| H | 1.945493000  | 2.592689000  | 1.146461000  |
| H | 3.033853000  | 3.357537000  | -0.024831000 |
| C | 2.356759000  | -2.519651000 | 0.143555000  |
| H | 1.947805000  | -2.590097000 | 1.154788000  |
| H | 1.512932000  | -2.623909000 | -0.543896000 |
| H | 3.036813000  | -3.357505000 | -0.014190000 |
| C | -2.361288000 | 2.517288000  | 0.184517000  |
| H | -1.972949000 | 2.577384000  | 1.204678000  |

|   |              |              |              |
|---|--------------|--------------|--------------|
| H | -1.502314000 | 2.624900000  | -0.483591000 |
| H | -3.037659000 | 3.356449000  | 0.016734000  |
| C | -2.359244000 | -2.517092000 | 0.182430000  |
| H | -1.500970000 | -2.623966000 | -0.486699000 |
| H | -1.969682000 | -2.577089000 | 1.202129000  |
| H | -3.035233000 | -3.356684000 | 0.015265000  |
| C | -6.496347000 | -0.001193000 | -1.155196000 |
| H | -6.541915000 | -0.014672000 | -2.249123000 |
| H | -7.034854000 | -0.881035000 | -0.797313000 |
| H | -7.028142000 | 0.891083000  | -0.818928000 |
| C | 6.512762000  | -0.000099000 | -1.125293000 |
| H | 6.573841000  | 0.014435000  | -2.218385000 |
| H | 7.045818000  | 0.879322000  | -0.758649000 |
| H | 7.038396000  | -0.893208000 | -0.782017000 |

**IMes-I(H)-B**

Etot = -1038.534015965433 a.u.

|   |              |              |              |
|---|--------------|--------------|--------------|
| C | -0.219624000 | -0.645732000 | 0.232366000  |
| C | -0.679649000 | 1.404847000  | -0.674811000 |
| H | -1.346713000 | 2.189943000  | -1.000223000 |
| C | 0.679596000  | 1.346637000  | -0.679340000 |
| H | 1.851760000  | 2.538936000  | -1.051642000 |
| N | -1.197922000 | 0.215617000  | -0.126342000 |
| N | 0.893478000  | 0.065673000  | -0.118714000 |
| C | 2.190570000  | -0.474384000 | 0.074346000  |
| C | 3.062516000  | 0.118515000  | 0.991425000  |
| C | 2.593299000  | -1.589143000 | -0.667527000 |
| C | 4.328240000  | -0.433870000 | 1.162165000  |
| C | 3.866399000  | -2.108581000 | -0.462315000 |
| C | 4.749322000  | -1.549024000 | 0.451973000  |
| H | 5.004146000  | 0.029092000  | 1.876957000  |
| H | 4.178271000  | -2.971581000 | -1.045864000 |
| C | -2.574901000 | -0.053165000 | 0.044522000  |
| C | -3.345422000 | -0.436662000 | -1.055070000 |
| C | -3.157310000 | 0.098499000  | 1.305905000  |
| C | -4.707110000 | -0.657195000 | -0.873492000 |
| C | -4.520151000 | -0.136700000 | 1.444601000  |
| C | -5.313503000 | -0.514272000 | 0.367553000  |
| H | -5.307814000 | -0.955874000 | -1.728983000 |
| H | -4.974736000 | -0.016088000 | 2.424843000  |
| C | -2.317240000 | 0.499993000  | 2.477102000  |
| H | -1.554293000 | -0.257783000 | 2.672166000  |
| H | -1.779510000 | 1.429360000  | 2.271771000  |
| H | -2.931463000 | 0.634945000  | 3.369790000  |
| C | -2.703680000 | -0.635974000 | -2.392941000 |
| H | -2.227339000 | 0.280085000  | -2.749944000 |

|   |              |              |              |
|---|--------------|--------------|--------------|
| H | -1.909521000 | -1.384301000 | -2.324491000 |
| H | -3.437574000 | -0.964537000 | -3.131507000 |
| C | 2.657469000  | 1.327748000  | 1.773692000  |
| H | 2.643629000  | 2.210623000  | 1.128075000  |
| H | 1.648197000  | 1.213844000  | 2.175406000  |
| H | 3.353135000  | 1.499304000  | 2.598907000  |
| C | 1.682228000  | -2.203525000 | -1.684587000 |
| H | 0.801902000  | -2.634303000 | -1.202035000 |
| H | 1.314849000  | -1.443956000 | -2.380027000 |
| H | 2.204472000  | -2.978333000 | -2.250894000 |
| C | 6.106849000  | -2.146928000 | 0.681373000  |
| H | 6.072952000  | -2.938057000 | 1.438895000  |
| H | 6.505387000  | -2.592203000 | -0.233842000 |
| H | 6.818720000  | -1.394270000 | 1.028513000  |
| C | -6.777537000 | -0.790299000 | 0.549537000  |
| H | -6.948349000 | -1.811906000 | 0.906026000  |
| H | -7.222826000 | -0.113536000 | 1.283104000  |
| H | -7.322962000 | -0.677249000 | -0.390061000 |
| O | 2.511219000  | 3.336644000  | -1.164127000 |
| C | 1.745026000  | 4.484033000  | -1.282707000 |
| H | 2.313948000  | 5.358431000  | -0.934911000 |
| H | 1.437589000  | 4.696008000  | -2.323946000 |
| H | 0.821661000  | 4.434761000  | -0.682015000 |

**IMes-TS1-B**  $i65\text{ cm}^{-1}$  Etot = -1381.619043481830 a.u.

|   |              |              |              |
|---|--------------|--------------|--------------|
| C | -1.748522000 | -1.922574000 | -0.166544000 |
| C | -2.256709000 | -0.083912000 | -1.433986000 |
| H | -2.939694000 | 0.639309000  | -1.856933000 |
| C | -0.899663000 | -0.167467000 | -1.516519000 |
| H | 2.531613000  | 3.090452000  | -0.746615000 |
| N | -2.745046000 | -1.130673000 | -0.626508000 |
| N | -0.659700000 | -1.313147000 | -0.721985000 |
| C | 0.650340000  | -1.819927000 | -0.526551000 |
| C | 1.555896000  | -1.105988000 | 0.263340000  |
| C | 1.030517000  | -3.016762000 | -1.136233000 |
| C | 2.844153000  | -1.604138000 | 0.420511000  |
| C | 2.326885000  | -3.484816000 | -0.944602000 |
| C | 3.251392000  | -2.790997000 | -0.175886000 |
| H | 3.548009000  | -1.042826000 | 1.029565000  |
| H | 2.621480000  | -4.417550000 | -1.419723000 |
| C | -4.108296000 | -1.335615000 | -0.314637000 |
| C | -4.955207000 | -1.914056000 | -1.262307000 |
| C | -4.601876000 | -0.928495000 | 0.928231000  |
| C | -6.301583000 | -2.072470000 | -0.949487000 |
| C | -5.952497000 | -1.108996000 | 1.201858000  |

|   |              |              |              |
|---|--------------|--------------|--------------|
| C | -6.819941000 | -1.678542000 | 0.276996000  |
| H | -6.960851000 | -2.524412000 | -1.686413000 |
| H | -6.337484000 | -0.790303000 | 2.167378000  |
| C | -3.681643000 | -0.319572000 | 1.938579000  |
| H | -2.916025000 | -1.041047000 | 2.234766000  |
| H | -3.148344000 | 0.536077000  | 1.516418000  |
| H | -4.233638000 | 0.006614000  | 2.822398000  |
| C | -4.409796000 | -2.381849000 | -2.575845000 |
| H | -3.978021000 | -1.556145000 | -3.146440000 |
| H | -3.599946000 | -3.098856000 | -2.416849000 |
| H | -5.190357000 | -2.855013000 | -3.174960000 |
| C | 1.137907000  | 0.158653000  | 0.944185000  |
| H | 0.760235000  | 0.881537000  | 0.217743000  |
| H | 0.317837000  | -0.037008000 | 1.641852000  |
| H | 1.973278000  | 0.599921000  | 1.490339000  |
| C | 0.063801000  | -3.777923000 | -1.988990000 |
| H | -0.782614000 | -4.126220000 | -1.392124000 |
| H | -0.351257000 | -3.132962000 | -2.768560000 |
| H | 0.553133000  | -4.633274000 | -2.460616000 |
| C | 4.658416000  | -3.289377000 | -0.018346000 |
| H | 5.040397000  | -3.094634000 | 0.987103000  |
| H | 4.721691000  | -4.364519000 | -0.202220000 |
| H | 5.337107000  | -2.795438000 | -0.722214000 |
| C | -8.268201000 | -1.890354000 | 0.608962000  |
| H | -8.413679000 | -2.811218000 | 1.184044000  |
| H | -8.664163000 | -1.068172000 | 1.210358000  |
| H | -8.875351000 | -1.971084000 | -0.295428000 |
| O | 3.260915000  | 3.272378000  | -0.126082000 |
| C | 2.717609000  | 3.942167000  | 0.974966000  |
| H | 3.534296000  | 4.180373000  | 1.662815000  |
| H | 2.226194000  | 4.884605000  | 0.694036000  |
| H | 1.984510000  | 3.331825000  | 1.520714000  |
| C | 0.549788000  | 2.235015000  | -2.536654000 |
| H | 0.915317000  | 1.205714000  | -2.605467000 |
| O | 1.037943000  | 3.075337000  | -1.797418000 |
| C | -0.552413000 | 2.540145000  | -3.438641000 |
| C | -1.268290000 | 1.752703000  | -4.291804000 |
| O | -0.962615000 | 3.831825000  | -3.551344000 |
| C | -2.169731000 | 2.611848000  | -4.968702000 |
| H | -1.180933000 | 0.679591000  | -4.348148000 |
| C | -1.936003000 | 3.856521000  | -4.473800000 |
| H | -2.906487000 | 2.345491000  | -5.710061000 |
| H | -2.372365000 | 4.821374000  | -4.676650000 |

**IMes-II-B** Etot = -1381.681853228635 a.u.

|   |              |              |              |
|---|--------------|--------------|--------------|
| C | -0.632100000 | -0.587232000 | 0.631198000  |
| C | 0.521722000  | -1.011287000 | 0.076613000  |
| N | -1.662782000 | -1.093932000 | -0.146790000 |
| C | -1.221060000 | -1.852687000 | -1.183569000 |
| N | 0.129308000  | -1.779656000 | -1.020253000 |
| H | -0.793241000 | 0.062726000  | 1.474520000  |
| O | 0.722834000  | 2.535490000  | 0.262873000  |
| C | 1.951834000  | -0.595537000 | 0.379300000  |
| O | 2.261234000  | 0.581184000  | -0.210632000 |
| H | 1.329963000  | 1.712418000  | 0.089278000  |
| C | 1.146796000  | 3.560944000  | -0.568099000 |
| H | 2.187225000  | 3.870931000  | -0.370979000 |
| H | 1.090740000  | 3.299018000  | -1.638672000 |
| H | 0.510395000  | 4.443453000  | -0.416547000 |
| H | 2.594173000  | -1.435141000 | 0.024889000  |
| C | 2.138788000  | -0.560565000 | 1.877249000  |
| C | 2.319877000  | 0.472462000  | 2.736689000  |
| O | 2.149500000  | -1.736636000 | 2.564099000  |
| C | 2.442336000  | -0.101649000 | 4.038904000  |
| H | 2.342018000  | 1.509893000  | 2.445579000  |
| C | 2.331997000  | -1.440665000 | 3.872441000  |
| H | 2.595119000  | 0.413105000  | 4.975433000  |
| H | 2.368743000  | -2.278546000 | 4.549807000  |
| C | -3.028889000 | -0.778861000 | 0.073930000  |
| C | -3.483297000 | 0.505505000  | -0.236993000 |
| C | -3.881703000 | -1.741829000 | 0.612626000  |
| C | -4.817115000 | 0.807013000  | 0.018065000  |
| C | -5.208563000 | -1.395392000 | 0.843356000  |
| C | -5.694407000 | -0.126598000 | 0.555115000  |
| H | -5.179060000 | 1.803814000  | -0.219214000 |
| H | -5.877389000 | -2.139411000 | 1.267977000  |
| C | 1.026292000  | -2.450242000 | -1.900833000 |
| C | 1.604904000  | -1.745705000 | -2.958826000 |
| C | 1.301141000  | -3.799460000 | -1.687335000 |
| C | 2.466641000  | -2.433507000 | -3.805953000 |
| C | 2.168474000  | -4.445983000 | -2.561880000 |
| C | 2.758960000  | -3.780093000 | -3.627307000 |
| H | 2.926164000  | -1.892403000 | -4.628802000 |
| H | 2.390396000  | -5.497290000 | -2.398976000 |
| C | 1.316235000  | -0.293062000 | -3.154045000 |
| H | 0.240315000  | -0.125570000 | -3.255769000 |
| H | 1.657952000  | 0.273694000  | -2.275169000 |
| H | 1.816804000  | 0.081803000  | -4.048964000 |
| C | 0.680003000  | -4.531499000 | -0.538686000 |
| H | 0.937339000  | -4.059609000 | 0.413626000  |

|   |              |              |              |
|---|--------------|--------------|--------------|
| H | -0.410037000 | -4.513881000 | -0.616147000 |
| H | 1.017082000  | -5.569409000 | -0.513802000 |
| C | 3.674576000  | -4.497774000 | -4.575434000 |
| H | 4.030539000  | -5.437524000 | -4.147938000 |
| H | 3.165126000  | -4.735102000 | -5.515371000 |
| H | 4.546229000  | -3.887664000 | -4.825519000 |
| C | -2.572022000 | 1.515838000  | -0.862345000 |
| H | -1.716352000 | 1.775946000  | -0.231443000 |
| H | -2.149064000 | 1.118969000  | -1.789507000 |
| H | -3.120248000 | 2.430384000  | -1.095433000 |
| C | -3.378661000 | -3.114951000 | 0.932700000  |
| H | -3.054342000 | -3.624129000 | 0.022050000  |
| H | -2.507759000 | -3.072228000 | 1.591759000  |
| H | -4.156041000 | -3.708243000 | 1.417796000  |
| C | -7.136636000 | 0.217267000  | 0.786812000  |
| H | -7.734181000 | 0.044382000  | -0.114642000 |
| H | -7.567352000 | -0.391521000 | 1.584922000  |
| H | -7.256414000 | 1.268418000  | 1.058930000  |

**IMes-TS2-B**

*i*1088 cm<sup>-1</sup>

Etot = -1381.643675343781 a.u.

|   |              |              |              |
|---|--------------|--------------|--------------|
| C | -0.423755000 | -0.811503000 | 0.530445000  |
| C | 0.728042000  | -1.076344000 | -0.139528000 |
| N | -1.474396000 | -1.125750000 | -0.324857000 |
| C | -1.055668000 | -1.564206000 | -1.534801000 |
| N | 0.300131000  | -1.538887000 | -1.393359000 |
| H | -0.574121000 | -0.439693000 | 1.527913000  |
| O | 3.486434000  | -3.177624000 | 0.153150000  |
| C | 2.131176000  | -1.016899000 | 0.306566000  |
| O | 3.004802000  | -0.498624000 | -0.692631000 |
| H | 3.611452000  | -1.236790000 | -0.855019000 |
| C | 4.218816000  | -3.438962000 | 1.286652000  |
| H | 5.310993000  | -3.343589000 | 1.124331000  |
| H | 3.977456000  | -2.755361000 | 2.124476000  |
| H | 4.055309000  | -4.464674000 | 1.673746000  |
| H | 2.667924000  | -2.228040000 | 0.394241000  |
| C | 2.357994000  | -0.293903000 | 1.560856000  |
| C | 3.294272000  | 0.637113000  | 1.910734000  |
| O | 1.611850000  | -0.611189000 | 2.655556000  |
| C | 3.114255000  | 0.893401000  | 3.301954000  |
| H | 4.020608000  | 1.063601000  | 1.240236000  |
| C | 2.084615000  | 0.114373000  | 3.704008000  |
| H | 3.677924000  | 1.572509000  | 3.923904000  |
| H | 1.580128000  | -0.029568000 | 4.644969000  |
| C | -2.841042000 | -1.019141000 | 0.036254000  |
| C | -3.617869000 | 0.008222000  | -0.503159000 |

|   |              |              |              |
|---|--------------|--------------|--------------|
| C | -3.385278000 | -1.937395000 | 0.936491000  |
| C | -4.951016000 | 0.101300000  | -0.120102000 |
| C | -4.722206000 | -1.801659000 | 1.295320000  |
| C | -5.522262000 | -0.791663000 | 0.777816000  |
| H | -5.557926000 | 0.902324000  | -0.533851000 |
| H | -5.149889000 | -2.515671000 | 1.994136000  |
| C | 1.124289000  | -1.928355000 | -2.494743000 |
| C | 1.492080000  | -0.964715000 | -3.435762000 |
| C | 1.483811000  | -3.265336000 | -2.648231000 |
| C | 2.242128000  | -1.361665000 | -4.533726000 |
| C | 2.237009000  | -3.616846000 | -3.766115000 |
| C | 2.629740000  | -2.684905000 | -4.713721000 |
| H | 2.530747000  | -0.614365000 | -5.268463000 |
| H | 2.523480000  | -4.657536000 | -3.890434000 |
| C | 1.098821000  | 0.465802000  | -3.252116000 |
| H | 0.017776000  | 0.560182000  | -3.121808000 |
| H | 1.577094000  | 0.868514000  | -2.355352000 |
| H | 1.403586000  | 1.064691000  | -4.112679000 |
| C | 1.104812000  | -4.298612000 | -1.637387000 |
| H | 1.774444000  | -4.213260000 | -0.771882000 |
| H | 0.074178000  | -4.163203000 | -1.303699000 |
| H | 1.209434000  | -5.300621000 | -2.059299000 |
| C | 3.472148000  | -3.085387000 | -5.889222000 |
| H | 3.195955000  | -2.527208000 | -6.787601000 |
| H | 4.533113000  | -2.890968000 | -5.699137000 |
| H | 3.369415000  | -4.150961000 | -6.105900000 |
| C | -3.028464000 | 0.984134000  | -1.472776000 |
| H | -2.122746000 | 1.442739000  | -1.067995000 |
| H | -2.732852000 | 0.474618000  | -2.392819000 |
| H | -3.744947000 | 1.772427000  | -1.711341000 |
| C | -2.558758000 | -3.062185000 | 1.478760000  |
| H | -2.076395000 | -3.611104000 | 0.666327000  |
| H | -1.754449000 | -2.702250000 | 2.124770000  |
| H | -3.178639000 | -3.753974000 | 2.051564000  |
| C | -6.971778000 | -0.687374000 | 1.151166000  |
| H | -7.602588000 | -1.236665000 | 0.444187000  |
| H | -7.157791000 | -1.102262000 | 2.144199000  |
| H | -7.309820000 | 0.351450000  | 1.148214000  |

**IMes-III-B**

Etot = -1381.647909133304 a.u.

|   |              |              |              |
|---|--------------|--------------|--------------|
| C | -0.535976000 | -0.669463000 | 0.527620000  |
| C | 0.647304000  | -0.918011000 | -0.123954000 |
| N | -1.564303000 | -1.019714000 | -0.350879000 |
| C | -1.122277000 | -1.461914000 | -1.543557000 |
| N | 0.235600000  | -1.400424000 | -1.386339000 |

|   |              |              |              |
|---|--------------|--------------|--------------|
| H | -0.715673000 | -0.275921000 | 1.510196000  |
| O | 2.990395000  | -3.431638000 | 0.856284000  |
| C | 2.002687000  | -0.809900000 | 0.319456000  |
| O | 3.011791000  | -0.727422000 | -0.663116000 |
| H | 3.465706000  | -1.576179000 | -0.687044000 |
| C | 3.533300000  | -3.587092000 | 2.139124000  |
| H | 4.200177000  | -4.455031000 | 2.124026000  |
| H | 4.111087000  | -2.709689000 | 2.454769000  |
| H | 2.760075000  | -3.769850000 | 2.899228000  |
| H | 2.478133000  | -2.577108000 | 0.838619000  |
| C | 2.369850000  | -0.181355000 | 1.537080000  |
| C | 3.582637000  | 0.322570000  | 1.978613000  |
| O | 1.451656000  | -0.058882000 | 2.543329000  |
| C | 3.376570000  | 0.752294000  | 3.317846000  |
| H | 4.485012000  | 0.375493000  | 1.393546000  |
| C | 2.082015000  | 0.503021000  | 3.623490000  |
| H | 4.104660000  | 1.200212000  | 3.978751000  |
| H | 1.470015000  | 0.668919000  | 4.493692000  |
| C | -2.936487000 | -0.944689000 | -0.012066000 |
| C | -3.736587000 | 0.042045000  | -0.593186000 |
| C | -3.467936000 | -1.847598000 | 0.912088000  |
| C | -5.077847000 | 0.106859000  | -0.232587000 |
| C | -4.813504000 | -1.741027000 | 1.247281000  |
| C | -5.636145000 | -0.773348000 | 0.685656000  |
| H | -5.701376000 | 0.877147000  | -0.679118000 |
| H | -5.229878000 | -2.444931000 | 1.963258000  |
| C | 1.068201000  | -1.797395000 | -2.473141000 |
| C | 1.557964000  | -0.829142000 | -3.353093000 |
| C | 1.325188000  | -3.150638000 | -2.679258000 |
| C | 2.323233000  | -1.238982000 | -4.434953000 |
| C | 2.100582000  | -3.517599000 | -3.777641000 |
| C | 2.610686000  | -2.580828000 | -4.663077000 |
| H | 2.707337000  | -0.486019000 | -5.118711000 |
| H | 2.304681000  | -4.572468000 | -3.941058000 |
| C | 1.275278000  | 0.618765000  | -3.114760000 |
| H | 0.205299000  | 0.788534000  | -2.971767000 |
| H | 1.783633000  | 0.952880000  | -2.206603000 |
| H | 1.621113000  | 1.225798000  | -3.953868000 |
| C | 0.781333000  | -4.190055000 | -1.749726000 |
| H | 1.245043000  | -4.115923000 | -0.761793000 |
| H | -0.296384000 | -4.059813000 | -1.624670000 |
| H | 0.975425000  | -5.191059000 | -2.140674000 |
| C | 3.447904000  | -2.996138000 | -5.837473000 |
| H | 3.014601000  | -2.648148000 | -6.780230000 |
| H | 4.457987000  | -2.579443000 | -5.774509000 |
| H | 3.538973000  | -4.082832000 | -5.892263000 |

|   |              |              |              |
|---|--------------|--------------|--------------|
| C | -3.161068000 | 1.008791000  | -1.580523000 |
| H | -2.261644000 | 1.484754000  | -1.181887000 |
| H | -2.857434000 | 0.488695000  | -2.491820000 |
| H | -3.888651000 | 1.783399000  | -1.831529000 |
| C | -2.617577000 | -2.928859000 | 1.502994000  |
| H | -2.097584000 | -3.480661000 | 0.715973000  |
| H | -1.839985000 | -2.521923000 | 2.153701000  |
| H | -3.227305000 | -3.626410000 | 2.080237000  |
| C | -7.093536000 | -0.700801000 | 1.035731000  |
| H | -7.697728000 | -1.298420000 | 0.344633000  |
| H | -7.280306000 | -1.080201000 | 2.042876000  |
| H | -7.464110000 | 0.325775000  | 0.985850000  |

**IMes-IV-B** Etot = -1724.804512368608 a.u.

|   |              |              |              |
|---|--------------|--------------|--------------|
| C | 0.606255000  | -1.506002000 | -0.150116000 |
| C | -0.537655000 | 0.493786000  | -0.019970000 |
| C | 0.775988000  | 0.745691000  | 0.171984000  |
| H | 1.287498000  | 1.668519000  | 0.383404000  |
| N | -0.606580000 | -0.890848000 | -0.217262000 |
| N | 1.440964000  | -0.463991000 | 0.086183000  |
| C | 2.843714000  | -0.601291000 | 0.275700000  |
| C | 3.676802000  | -0.677695000 | -0.839664000 |
| C | 3.354063000  | -0.651818000 | 1.574678000  |
| C | 5.047764000  | -0.787619000 | -0.635223000 |
| C | 4.732695000  | -0.758630000 | 1.728533000  |
| C | 5.594694000  | -0.820135000 | 0.641027000  |
| H | 5.703156000  | -0.851113000 | -1.499641000 |
| H | 5.140192000  | -0.803758000 | 2.734758000  |
| C | -1.784848000 | -1.685650000 | -0.379031000 |
| C | -2.226337000 | -2.012276000 | -1.656702000 |
| C | -2.419030000 | -2.182191000 | 0.760628000  |
| C | -3.354431000 | -2.819500000 | -1.777601000 |
| C | -3.539090000 | -2.983493000 | 0.591978000  |
| C | -4.030505000 | -3.304104000 | -0.668473000 |
| H | -3.707637000 | -3.075973000 | -2.772810000 |
| H | -4.043508000 | -3.366708000 | 1.474981000  |
| C | -1.891624000 | -1.871403000 | 2.124382000  |
| H | -0.886572000 | -2.285463000 | 2.246845000  |
| H | -1.812407000 | -0.794050000 | 2.289423000  |
| H | -2.538349000 | -2.295027000 | 2.894517000  |
| C | -1.500029000 | -1.534046000 | -2.874563000 |
| H | -1.522823000 | -0.443848000 | -2.949974000 |
| H | -0.449123000 | -1.832984000 | -2.836380000 |
| H | -1.950165000 | -1.950691000 | -3.777523000 |
| C | 3.104813000  | -0.659746000 | -2.223212000 |

|   |              |              |              |
|---|--------------|--------------|--------------|
| H | 2.427048000  | -1.504397000 | -2.368689000 |
| H | 2.517836000  | 0.245621000  | -2.399168000 |
| H | 3.898417000  | -0.707626000 | -2.970737000 |
| C | 2.445519000  | -0.626353000 | 2.762750000  |
| H | 1.889992000  | 0.311759000  | 2.863038000  |
| H | 1.695229000  | -1.417152000 | 2.682402000  |
| H | 3.014801000  | -0.781010000 | 3.680925000  |
| C | 7.079577000  | -0.898794000 | 0.841419000  |
| H | 7.515535000  | 0.099336000  | 0.955246000  |
| H | 7.330000000  | -1.466071000 | 1.740704000  |
| H | 7.571416000  | -1.375003000 | -0.009537000 |
| C | -5.269705000 | -4.136233000 | -0.820092000 |
| H | -5.300804000 | -4.944329000 | -0.084740000 |
| H | -6.170539000 | -3.530835000 | -0.674594000 |
| H | -5.330288000 | -4.580668000 | -1.815926000 |
| C | -1.705100000 | 1.460328000  | -0.048454000 |
| O | -2.878782000 | 0.856024000  | 0.389360000  |
| H | -2.824271000 | 1.114905000  | 1.360873000  |
| C | -1.872247000 | 1.997186000  | -1.432713000 |
| C | -1.009361000 | 2.161606000  | -2.473260000 |
| O | -3.079825000 | 2.508878000  | -1.763054000 |
| C | -1.737812000 | 2.824504000  | -3.503511000 |
| H | 0.021192000  | 1.847338000  | -2.490087000 |
| C | -2.986288000 | 3.006982000  | -3.012698000 |
| H | -1.381693000 | 3.118056000  | -4.478766000 |
| H | -3.884442000 | 3.446904000  | -3.413684000 |
| C | -1.424383000 | 2.603057000  | 1.068348000  |
| O | -1.834345000 | 2.078464000  | 2.243355000  |
| H | -0.343728000 | 2.829949000  | 1.018080000  |
| C | -2.146756000 | 3.881722000  | 0.765128000  |
| C | -3.256437000 | 4.438172000  | 1.311882000  |
| O | -1.647726000 | 4.706822000  | -0.193884000 |
| C | -3.463437000 | 5.677760000  | 0.637386000  |
| H | -3.833812000 | 3.994678000  | 2.105476000  |
| C | -2.458899000 | 5.785826000  | -0.264653000 |
| H | -4.251567000 | 6.396631000  | 0.802343000  |
| H | -2.190027000 | 6.535112000  | -0.991267000 |
| H | -0.613990000 | 1.829626000  | 3.162847000  |
| O | 0.215555000  | 1.745234000  | 3.743803000  |
| C | 0.215807000  | 2.799370000  | 4.650363000  |
| H | 0.178788000  | 3.784697000  | 4.159778000  |
| H | -0.631773000 | 2.756547000  | 5.353468000  |
| H | 1.137410000  | 2.759531000  | 5.243851000  |

**IMes-V-B**

Etot = -1724.801682514534 a.u.

|   |              |              |              |
|---|--------------|--------------|--------------|
| C | 0.455327000  | -1.749392000 | -0.202276000 |
| C | -0.781509000 | 0.193833000  | -0.227487000 |
| C | 0.522885000  | 0.527943000  | -0.094986000 |
| H | 0.988467000  | 1.496939000  | -0.022176000 |
| N | -0.787715000 | -1.199729000 | -0.286434000 |
| N | 1.247320000  | -0.653078000 | -0.088632000 |
| C | 2.658416000  | -0.720154000 | 0.048965000  |
| C | 3.439875000  | -1.053008000 | -1.059506000 |
| C | 3.239172000  | -0.456733000 | 1.290257000  |
| C | 4.819773000  | -1.103841000 | -0.903035000 |
| C | 4.625023000  | -0.514803000 | 1.397835000  |
| C | 5.432588000  | -0.831177000 | 0.314013000  |
| H | 5.432403000  | -1.366696000 | -1.761171000 |
| H | 5.081906000  | -0.319860000 | 2.364238000  |
| C | -1.923000000 | -2.071209000 | -0.371279000 |
| C | -2.451924000 | -2.395010000 | -1.617635000 |
| C | -2.411701000 | -2.645871000 | 0.798853000  |
| C | -3.503445000 | -3.300057000 | -1.670162000 |
| C | -3.464575000 | -3.547204000 | 0.698254000  |
| C | -4.029090000 | -3.882029000 | -0.524903000 |
| H | -3.934436000 | -3.540028000 | -2.637962000 |
| H | -3.857235000 | -3.994282000 | 1.607795000  |
| C | -1.828536000 | -2.293890000 | 2.131346000  |
| H | -0.767077000 | -2.555136000 | 2.168427000  |
| H | -1.910744000 | -1.220099000 | 2.323577000  |
| H | -2.347106000 | -2.828063000 | 2.929861000  |
| C | -1.930501000 | -1.760550000 | -2.866717000 |
| H | -2.212442000 | -0.704593000 | -2.906121000 |
| H | -0.839850000 | -1.813701000 | -2.913571000 |
| H | -2.344398000 | -2.251787000 | -3.748843000 |
| C | 2.805266000  | -1.361398000 | -2.379359000 |
| H | 2.160330000  | -2.239247000 | -2.296656000 |
| H | 2.166965000  | -0.539219000 | -2.713603000 |
| H | 3.565789000  | -1.542423000 | -3.140800000 |
| C | 2.392756000  | -0.152352000 | 2.487842000  |
| H | 1.923820000  | 0.832351000  | 2.415507000  |
| H | 1.579839000  | -0.875448000 | 2.583358000  |
| H | 2.993570000  | -0.174997000 | 3.398366000  |
| C | 6.926657000  | -0.859996000 | 0.446383000  |
| H | 7.368960000  | 0.093433000  | 0.138887000  |
| H | 7.230228000  | -1.042754000 | 1.479243000  |
| H | 7.367053000  | -1.638854000 | -0.180345000 |
| C | -5.199028000 | -4.817514000 | -0.607258000 |
| H | -5.280001000 | -5.433171000 | 0.291511000  |
| H | -6.136586000 | -4.261958000 | -0.713507000 |

|   |              |              |              |
|---|--------------|--------------|--------------|
| H | -5.118411000 | -5.484260000 | -1.469815000 |
| C | -2.015308000 | 1.094227000  | -0.297089000 |
| O | -3.162521000 | 0.394804000  | -0.223923000 |
| H | -3.214156000 | 0.708042000  | 1.324945000  |
| C | -1.912889000 | 1.931861000  | -1.551881000 |
| C | -0.960971000 | 2.117070000  | -2.507952000 |
| O | -3.005112000 | 2.667523000  | -1.866299000 |
| C | -1.507388000 | 3.026903000  | -3.461142000 |
| H | 0.008182000  | 1.648256000  | -2.532177000 |
| C | -2.750069000 | 3.322436000  | -3.014710000 |
| H | -1.041808000 | 3.399299000  | -4.360501000 |
| H | -3.545391000 | 3.945072000  | -3.390071000 |
| C | -1.966618000 | 2.022869000  | 1.047973000  |
| O | -2.697986000 | 1.294085000  | 1.974985000  |
| H | -0.919330000 | 2.121559000  | 1.357725000  |
| C | -2.536831000 | 3.388519000  | 0.901082000  |
| C | -3.738538000 | 3.922715000  | 1.235172000  |
| O | -1.751027000 | 4.342841000  | 0.337551000  |
| C | -3.696137000 | 5.291228000  | 0.835806000  |
| H | -4.546037000 | 3.384547000  | 1.702183000  |
| C | -2.469910000 | 5.487636000  | 0.296467000  |
| H | -4.474584000 | 6.031933000  | 0.936410000  |
| H | -1.976615000 | 6.342383000  | -0.136216000 |
| O | -5.075936000 | 0.117957000  | -2.031548000 |
| C | -6.081419000 | 1.010031000  | -1.671578000 |
| H | -6.535852000 | 0.769593000  | -0.696598000 |
| H | -5.726741000 | 2.049900000  | -1.618770000 |
| H | -6.877285000 | 0.964036000  | -2.424639000 |
| H | -4.332080000 | 0.219749000  | -1.378630000 |

**VI...IMes-I(H)-B**

Etot = -1724.783763755919 a.u.

|   |              |              |              |
|---|--------------|--------------|--------------|
| C | 0.355389000  | -2.325204000 | 0.527644000  |
| C | -0.825993000 | -0.395656000 | 0.092008000  |
| C | 0.396406000  | -0.253661000 | -0.452956000 |
| H | 0.819647000  | 0.566486000  | -1.007927000 |
| N | -0.823602000 | -1.660105000 | 0.672933000  |
| N | 1.094090000  | -1.426477000 | -0.176479000 |
| C | 2.429995000  | -1.670947000 | -0.587454000 |
| C | 2.731674000  | -1.729530000 | -1.949981000 |
| C | 3.427002000  | -1.841458000 | 0.378810000  |
| C | 4.050778000  | -1.963962000 | -2.326946000 |
| C | 4.727613000  | -2.078977000 | -0.048113000 |
| C | 5.062808000  | -2.140134000 | -1.395186000 |
| H | 4.285848000  | -2.019485000 | -3.386423000 |
| H | 5.503386000  | -2.214692000 | 0.700782000  |

|   |              |              |              |
|---|--------------|--------------|--------------|
| C | -1.937949000 | -2.211926000 | 1.365663000  |
| C | -2.524998000 | -3.387870000 | 0.888891000  |
| C | -2.430963000 | -1.565514000 | 2.502211000  |
| C | -3.604730000 | -3.918084000 | 1.584394000  |
| C | -3.517125000 | -2.136679000 | 3.159735000  |
| C | -4.117646000 | -3.306788000 | 2.721412000  |
| H | -4.062128000 | -4.832989000 | 1.216894000  |
| H | -3.901756000 | -1.639974000 | 4.046210000  |
| C | -1.841351000 | -0.287152000 | 3.006421000  |
| H | -0.751191000 | -0.297324000 | 2.938998000  |
| H | -2.205298000 | 0.561882000  | 2.408686000  |
| H | -2.125819000 | -0.128521000 | 4.049123000  |
| C | -2.028545000 | -4.065822000 | -0.351303000 |
| H | -1.982241000 | -3.363623000 | -1.188193000 |
| H | -1.015256000 | -4.446697000 | -0.210216000 |
| H | -2.692230000 | -4.888400000 | -0.625855000 |
| C | 1.672328000  | -1.559200000 | -2.995787000 |
| H | 0.751776000  | -2.073057000 | -2.712721000 |
| H | 1.417456000  | -0.505074000 | -3.140082000 |
| H | 2.017405000  | -1.956384000 | -3.952362000 |
| C | 3.113572000  | -1.764376000 | 1.840602000  |
| H | 2.592597000  | -0.833754000 | 2.080690000  |
| H | 2.444034000  | -2.574721000 | 2.135588000  |
| H | 4.030377000  | -1.813531000 | 2.431366000  |
| C | 6.482405000  | -2.362623000 | -1.826707000 |
| H | 7.046101000  | -1.423697000 | -1.831357000 |
| H | 7.001172000  | -3.048974000 | -1.153174000 |
| H | 6.529954000  | -2.776526000 | -2.836177000 |
| C | -5.310629000 | -3.876042000 | 3.431356000  |
| H | -5.323798000 | -3.581874000 | 4.483175000  |
| H | -6.243965000 | -3.520483000 | 2.981934000  |
| H | -5.321135000 | -4.967741000 | 3.383018000  |
| C | -2.239878000 | 3.220921000  | -0.924895000 |
| O | -1.463134000 | 2.437517000  | -1.435430000 |
| H | -1.663906000 | 0.307808000  | 0.148965000  |
| C | -2.186271000 | 4.643021000  | -1.304431000 |
| C | -2.786031000 | 5.772131000  | -0.827183000 |
| O | -1.360191000 | 4.977583000  | -2.334378000 |
| C | -2.304565000 | 6.853163000  | -1.609465000 |
| H | -3.494420000 | 5.809288000  | -0.016900000 |
| C | -1.443928000 | 6.302496000  | -2.504790000 |
| H | -2.557632000 | 7.897805000  | -1.520295000 |
| H | -0.838240000 | 6.718224000  | -3.294033000 |
| C | -3.262057000 | 2.763222000  | 0.157565000  |
| O | -2.945079000 | 1.626885000  | 0.738692000  |
| H | -3.331867000 | 3.653581000  | 0.843583000  |

|   |              |             |              |
|---|--------------|-------------|--------------|
| C | -4.617148000 | 2.697940000 | -0.539880000 |
| C | -5.376150000 | 1.614837000 | -0.840695000 |
| O | -5.271723000 | 3.833441000 | -0.914794000 |
| C | -6.570967000 | 2.110601000 | -1.442934000 |
| H | -5.092342000 | 0.599207000 | -0.621512000 |
| C | -6.453368000 | 3.459294000 | -1.462010000 |
| H | -7.410657000 | 1.539721000 | -1.809451000 |
| H | -7.091930000 | 4.256318000 | -1.807428000 |
| O | 0.554612000  | 2.206107000 | -3.338190000 |
| C | -0.168990000 | 1.821084000 | -4.473534000 |
| H | -0.824312000 | 0.961160000 | -4.281293000 |
| H | -0.791501000 | 2.636668000 | -4.868477000 |
| H | 0.546075000  | 1.536958000 | -5.250831000 |
| H | -0.095144000 | 2.416363000 | -2.642272000 |

**IMes-I-C**

Etot = -923.388067910936 a.u.

|   |              |              |              |
|---|--------------|--------------|--------------|
| C | -0.012801000 | -0.000113000 | -0.145081000 |
| C | 0.649546000  | 0.001218000  | 1.943210000  |
| H | 1.395725000  | 0.001753000  | 2.723172000  |
| C | -0.722163000 | 0.001165000  | 2.023244000  |
| N | 1.071505000  | 0.000430000  | 0.616248000  |
| N | -1.074167000 | 0.000295000  | 0.662452000  |
| C | -2.419732000 | -0.000124000 | 0.178474000  |
| C | -3.060763000 | 1.219546000  | -0.038286000 |
| C | -3.060480000 | -1.220303000 | -0.037021000 |
| C | -4.377957000 | 1.193527000  | -0.485123000 |
| C | -4.377560000 | -1.195159000 | -0.483869000 |
| C | -5.051870000 | -0.000983000 | -0.716752000 |
| H | -4.890922000 | 2.136154000  | -0.651814000 |
| H | -4.890207000 | -2.138143000 | -0.649575000 |
| C | 2.421687000  | 0.000214000  | 0.145510000  |
| C | 3.063335000  | -1.221703000 | -0.059152000 |
| C | 3.063187000  | 1.222095000  | -0.060777000 |
| C | 4.386142000  | -1.194919000 | -0.487452000 |
| C | 4.385858000  | 1.195027000  | -0.489009000 |
| C | 5.062659000  | -0.000090000 | -0.710350000 |
| H | 4.901371000  | -2.137299000 | -0.647133000 |
| H | 4.900868000  | 2.137330000  | -0.649924000 |
| C | 2.356686000  | 2.523268000  | 0.166938000  |
| H | 1.512208000  | 2.641237000  | -0.517926000 |
| H | 1.956199000  | 2.588483000  | 1.181661000  |
| H | 3.038698000  | 3.359154000  | 0.011727000  |
| C | 2.357172000  | -2.522772000 | 0.170202000  |
| H | 1.956494000  | -2.586732000 | 1.184927000  |
| H | 1.512876000  | -2.641928000 | -0.514682000 |

|   |              |              |              |
|---|--------------|--------------|--------------|
| H | 3.039462000  | -3.358668000 | 0.016271000  |
| C | -2.360492000 | 2.520439000  | 0.208769000  |
| H | -1.980046000 | 2.574162000  | 1.231933000  |
| H | -1.501326000 | 2.643681000  | -0.456821000 |
| H | -3.039323000 | 3.357543000  | 0.045050000  |
| C | -2.359765000 | -2.520686000 | 0.211457000  |
| H | -1.500386000 | -2.644235000 | -0.453799000 |
| H | -1.979547000 | -2.573267000 | 1.234766000  |
| H | -3.038239000 | -3.358205000 | 0.048392000  |
| C | -6.461625000 | -0.001688000 | -1.226693000 |
| H | -6.476932000 | -0.015439000 | -2.321248000 |
| H | -7.007274000 | -0.882143000 | -0.882427000 |
| H | -7.000215000 | 0.891212000  | -0.904281000 |
| C | 6.479152000  | 0.000018000  | -1.199925000 |
| H | 6.508424000  | 0.014956000  | -2.294141000 |
| H | 7.020212000  | 0.879949000  | -0.847491000 |
| H | 7.012134000  | -0.893831000 | -0.871273000 |
| H | -0.019947000 | -0.000786000 | -1.223851000 |

**IMes-I(H)-C** Etot = -1039.045413951593 a.u.

|   |              |              |              |
|---|--------------|--------------|--------------|
| C | -0.263489000 | -0.523897000 | 0.202846000  |
| C | -0.724630000 | 1.375613000  | -0.784706000 |
| H | -1.386193000 | 2.136645000  | -1.167139000 |
| C | 0.646813000  | 1.314883000  | -0.779525000 |
| H | 2.042221000  | 2.546563000  | -0.970963000 |
| N | -1.272017000 | 0.247804000  | -0.182080000 |
| N | 0.870559000  | 0.088669000  | -0.144235000 |
| C | 2.161736000  | -0.478834000 | 0.096795000  |
| C | 2.958838000  | 0.055682000  | 1.110540000  |
| C | 2.592089000  | -1.534833000 | -0.703502000 |
| C | 4.203555000  | -0.521710000 | 1.323057000  |
| C | 3.848611000  | -2.074944000 | -0.451191000 |
| C | 4.666992000  | -1.584977000 | 0.556630000  |
| H | 4.834236000  | -0.118395000 | 2.109645000  |
| H | 4.198941000  | -2.894233000 | -1.071652000 |
| C | -2.658842000 | -0.035014000 | 0.008186000  |
| C | -3.363652000 | -0.670505000 | -1.015428000 |
| C | -3.274143000 | 0.370860000  | 1.191720000  |
| C | -4.718603000 | -0.903812000 | -0.820637000 |
| C | -4.632737000 | 0.113822000  | 1.336811000  |
| C | -5.370424000 | -0.523396000 | 0.347330000  |
| H | -5.282075000 | -1.392370000 | -1.609715000 |
| H | -5.128209000 | 0.430024000  | 2.249565000  |
| C | -2.502374000 | 1.056894000  | 2.277175000  |
| H | -1.852974000 | 0.353447000  | 2.806707000  |

|   |              |              |              |
|---|--------------|--------------|--------------|
| H | -1.861287000 | 1.846591000  | 1.880235000  |
| H | -3.179461000 | 1.496881000  | 3.009370000  |
| C | -2.684439000 | -1.092112000 | -2.282349000 |
| H | -2.129558000 | -0.268032000 | -2.735814000 |
| H | -1.964475000 | -1.894964000 | -2.099377000 |
| H | -3.414017000 | -1.456030000 | -3.005653000 |
| C | 2.514952000  | 1.231004000  | 1.922583000  |
| H | 2.571098000  | 2.144151000  | 1.321872000  |
| H | 1.481128000  | 1.126875000  | 2.260167000  |
| H | 3.153314000  | 1.351534000  | 2.798657000  |
| C | 1.749481000  | -2.065190000 | -1.824589000 |
| H | 0.926823000  | -2.687820000 | -1.459287000 |
| H | 1.310686000  | -1.251878000 | -2.406664000 |
| H | 2.351694000  | -2.680621000 | -2.493516000 |
| C | 6.029184000  | -2.162332000 | 0.797535000  |
| H | 6.195602000  | -2.357488000 | 1.859581000  |
| H | 6.166910000  | -3.098207000 | 0.254121000  |
| H | 6.809459000  | -1.469040000 | 0.470216000  |
| C | -6.828840000 | -0.810372000 | 0.537777000  |
| H | -6.980441000 | -1.836721000 | 0.885911000  |
| H | -7.272572000 | -0.143580000 | 1.278479000  |
| H | -7.381432000 | -0.699950000 | -0.397177000 |
| H | -0.360322000 | -1.472046000 | 0.706079000  |
| O | 2.778030000  | 3.216220000  | -0.901694000 |
| C | 2.334258000  | 4.411513000  | -1.467808000 |
| H | 3.114213000  | 5.167874000  | -1.340701000 |
| H | 2.133194000  | 4.321102000  | -2.546151000 |
| H | 1.419323000  | 4.796309000  | -0.991212000 |

**IMes-TS1-C**  $i154\text{ cm}^{-1}$  Etot = -1382.142528251881 a.u.

|   |              |              |              |
|---|--------------|--------------|--------------|
| C | -1.806625000 | -1.696368000 | -0.263869000 |
| C | -2.419255000 | -0.188333000 | -1.730437000 |
| H | -3.130600000 | 0.419660000  | -2.266600000 |
| C | -1.051991000 | -0.224368000 | -1.806929000 |
| H | 2.424125000  | 1.752849000  | -0.491914000 |
| N | -2.872040000 | -1.095567000 | -0.780333000 |
| N | -0.724624000 | -1.192597000 | -0.858623000 |
| C | 0.609249000  | -1.618747000 | -0.555138000 |
| C | 1.272349000  | -1.042613000 | 0.527864000  |
| C | 1.207361000  | -2.572203000 | -1.375059000 |
| C | 2.575192000  | -1.451719000 | 0.775891000  |
| C | 2.511685000  | -2.951964000 | -1.080161000 |
| C | 3.211744000  | -2.400654000 | -0.014907000 |
| H | 3.118392000  | -0.982673000 | 1.589100000  |
| H | 2.996317000  | -3.690080000 | -1.712061000 |

|   |              |              |              |
|---|--------------|--------------|--------------|
| C | -4.228999000 | -1.335752000 | -0.402494000 |
| C | -4.947550000 | -2.332256000 | -1.061961000 |
| C | -4.801411000 | -0.536690000 | 0.588143000  |
| C | -6.273993000 | -2.524850000 | -0.694515000 |
| C | -6.130443000 | -0.770141000 | 0.917958000  |
| C | -6.881434000 | -1.759387000 | 0.293248000  |
| H | -6.849468000 | -3.292732000 | -1.202260000 |
| H | -6.592771000 | -0.154594000 | 1.683468000  |
| C | -4.013129000 | 0.534659000  | 1.277029000  |
| H | -3.210843000 | 0.109210000  | 1.886514000  |
| H | -3.539224000 | 1.211640000  | 0.562935000  |
| H | -4.655780000 | 1.121156000  | 1.933324000  |
| C | -4.315906000 | -3.172627000 | -2.129377000 |
| H | -3.782910000 | -2.561748000 | -2.860977000 |
| H | -3.588335000 | -3.871518000 | -1.706391000 |
| H | -5.071458000 | -3.757879000 | -2.653454000 |
| C | 0.621468000  | 0.005245000  | 1.376441000  |
| H | 0.227553000  | 0.814222000  | 0.757276000  |
| H | -0.205715000 | -0.407312000 | 1.963304000  |
| H | 1.347413000  | 0.434434000  | 2.065716000  |
| C | 0.479510000  | -3.161819000 | -2.544281000 |
| H | -0.404654000 | -3.723585000 | -2.227705000 |
| H | 0.132848000  | -2.381085000 | -3.225497000 |
| H | 1.128129000  | -3.842783000 | -3.095769000 |
| C | 4.632507000  | -2.787943000 | 0.262567000  |
| H | 4.760341000  | -3.112680000 | 1.298270000  |
| H | 4.960412000  | -3.598203000 | -0.390223000 |
| H | 5.300061000  | -1.936092000 | 0.106426000  |
| C | -8.305314000 | -2.005479000 | 0.690054000  |
| H | -8.357679000 | -2.692984000 | 1.539917000  |
| H | -8.800700000 | -1.080170000 | 0.989392000  |
| H | -8.875344000 | -2.450841000 | -0.126777000 |
| H | -1.827389000 | -2.456669000 | 0.500113000  |
| O | 3.258009000  | 1.773128000  | 0.013839000  |
| C | 3.644803000  | 3.112999000  | 0.148305000  |
| H | 4.567638000  | 3.141295000  | 0.733243000  |
| H | 3.845927000  | 3.591828000  | -0.820018000 |
| H | 2.892376000  | 3.717876000  | 0.672400000  |
| C | 0.364737000  | 1.569093000  | -2.361644000 |
| H | 0.919319000  | 0.867924000  | -2.999924000 |
| O | 0.818311000  | 1.984970000  | -1.298418000 |
| C | -0.700591000 | 2.277917000  | -3.081973000 |
| C | -1.100915000 | 2.227870000  | -4.382440000 |
| O | -1.421803000 | 3.207674000  | -2.414754000 |
| C | -2.140688000 | 3.187779000  | -4.519593000 |
| H | -0.699435000 | 1.577134000  | -5.143084000 |

|   |              |             |              |
|---|--------------|-------------|--------------|
| C | -2.289350000 | 3.746784000 | -3.292517000 |
| H | -2.697359000 | 3.436560000 | -5.409096000 |
| H | -2.937721000 | 4.516274000 | -2.906585000 |

**IMes-II-C** Etot = -1382.186680032077 a.u.

|   |              |              |              |
|---|--------------|--------------|--------------|
| C | -1.834440000 | -1.615175000 | -0.188179000 |
| C | -2.501368000 | 0.121703000  | -1.351576000 |
| H | -3.202258000 | 0.821791000  | -1.769741000 |
| C | -1.139312000 | 0.111459000  | -1.392552000 |
| H | 1.796257000  | 1.807239000  | -0.548390000 |
| N | -2.912813000 | -0.953942000 | -0.592099000 |
| N | -0.755031000 | -0.999198000 | -0.660154000 |
| C | 0.589137000  | -1.453473000 | -0.427889000 |
| C | 1.244628000  | -1.037502000 | 0.729783000  |
| C | 1.176823000  | -2.287881000 | -1.375891000 |
| C | 2.541976000  | -1.492806000 | 0.918004000  |
| C | 2.476340000  | -2.713457000 | -1.134833000 |
| C | 3.175427000  | -2.319789000 | -0.000256000 |
| H | 3.082978000  | -1.159618000 | 1.797182000  |
| H | 2.958667000  | -3.358235000 | -1.862785000 |
| C | -4.266855000 | -1.282447000 | -0.261956000 |
| C | -4.968834000 | -2.155505000 | -1.092444000 |
| C | -4.839504000 | -0.688813000 | 0.862104000  |
| C | -6.287412000 | -2.436577000 | -0.759744000 |
| C | -6.162294000 | -1.005049000 | 1.148515000  |
| C | -6.900047000 | -1.875352000 | 0.355401000  |
| H | -6.853755000 | -3.108621000 | -1.396856000 |
| H | -6.629470000 | -0.549769000 | 2.015938000  |
| C | -4.064730000 | 0.250618000  | 1.734507000  |
| H | -3.262391000 | -0.269116000 | 2.265943000  |
| H | -3.593985000 | 1.050844000  | 1.159320000  |
| H | -4.716817000 | 0.704256000  | 2.480229000  |
| C | -4.331486000 | -2.769614000 | -2.301342000 |
| H | -3.870379000 | -2.015232000 | -2.942858000 |
| H | -3.545774000 | -3.478109000 | -2.023641000 |
| H | -5.071642000 | -3.310765000 | -2.890115000 |
| C | 0.595114000  | -0.106855000 | 1.702201000  |
| H | 0.279400000  | 0.799880000  | 1.171228000  |
| H | -0.282021000 | -0.562264000 | 2.174667000  |
| H | 1.296065000  | 0.168655000  | 2.489236000  |
| C | 0.451499000  | -2.700491000 | -2.620704000 |
| H | -0.488719000 | -3.213384000 | -2.397510000 |
| H | 0.206179000  | -1.836038000 | -3.244092000 |
| H | 1.067014000  | -3.377198000 | -3.213208000 |
| C | 4.598044000  | -2.738209000 | 0.210436000  |

|   |              |              |              |
|---|--------------|--------------|--------------|
| H | 4.782329000  | -3.014889000 | 1.250621000  |
| H | 4.865118000  | -3.585237000 | -0.423305000 |
| H | 5.274396000  | -1.912985000 | -0.031018000 |
| C | -8.317008000 | -2.216808000 | 0.701551000  |
| H | -8.362395000 | -3.154758000 | 1.263315000  |
| H | -8.774192000 | -1.442055000 | 1.318403000  |
| H | -8.925544000 | -2.345428000 | -0.195353000 |
| H | -1.833333000 | -2.505901000 | 0.416968000  |
| O | 2.793160000  | 1.723685000  | -0.425035000 |
| C | 3.377120000  | 2.946227000  | -0.750136000 |
| H | 4.465088000  | 2.853727000  | -0.660396000 |
| H | 3.156040000  | 3.264077000  | -1.780787000 |
| H | 3.058466000  | 3.762151000  | -0.082970000 |
| C | -0.123562000 | 1.143546000  | -1.848901000 |
| H | 0.710714000  | 0.567593000  | -2.317572000 |
| O | 0.234021000  | 1.851264000  | -0.764802000 |
| C | -0.680124000 | 1.954529000  | -2.989375000 |
| C | -0.236241000 | 2.172388000  | -4.253337000 |
| O | -1.796702000 | 2.696621000  | -2.768106000 |
| C | -1.132829000 | 3.109726000  | -4.848520000 |
| H | 0.643301000  | 1.732362000  | -4.696293000 |
| C | -2.055457000 | 3.390280000  | -3.900700000 |
| H | -1.088355000 | 3.527271000  | -5.841967000 |
| H | -2.913891000 | 4.041134000  | -3.873180000 |

**IMes-TS2-C**       $i438 \text{ cm}^{-1}$        $E_{\text{tot}} = -1382.151149050252 \text{ a.u.}$

|   |              |              |              |
|---|--------------|--------------|--------------|
| C | -0.431304000 | -0.816818000 | 0.582302000  |
| C | 0.745788000  | -1.062732000 | -0.078699000 |
| N | -1.470383000 | -1.157267000 | -0.252531000 |
| C | -0.964072000 | -1.589064000 | -1.397215000 |
| N | 0.367457000  | -1.548207000 | -1.327412000 |
| H | -0.599877000 | -0.447719000 | 1.577078000  |
| O | 3.396336000  | -3.180106000 | 0.162524000  |
| C | 2.136803000  | -0.995896000 | 0.391471000  |
| O | 3.047766000  | -0.698195000 | -0.637602000 |
| H | 3.564009000  | -1.540673000 | -0.662372000 |
| C | 4.290517000  | -3.555651000 | 1.142039000  |
| H | 5.333457000  | -3.582631000 | 0.776236000  |
| H | 4.293574000  | -2.873881000 | 2.015031000  |
| H | 4.078498000  | -4.563911000 | 1.544638000  |
| H | 2.516882000  | -2.145859000 | 0.607207000  |
| C | 2.349179000  | -0.113370000 | 1.556575000  |
| C | 3.292007000  | 0.830325000  | 1.809191000  |
| O | 1.550071000  | -0.270223000 | 2.646872000  |
| C | 3.060729000  | 1.282757000  | 3.143374000  |

|   |              |              |              |
|---|--------------|--------------|--------------|
| H | 4.060131000  | 1.141566000  | 1.121828000  |
| C | 1.997407000  | 0.588292000  | 3.602683000  |
| H | 3.618664000  | 2.027514000  | 3.688865000  |
| H | 1.458645000  | 0.579634000  | 4.535292000  |
| C | -2.864513000 | -1.061731000 | 0.060205000  |
| C | -3.558342000 | 0.088034000  | -0.311581000 |
| C | -3.469580000 | -2.119664000 | 0.739220000  |
| C | -4.907871000 | 0.156632000  | 0.014116000  |
| C | -4.819933000 | -1.998833000 | 1.039336000  |
| C | -5.554657000 | -0.871278000 | 0.688775000  |
| H | -5.466713000 | 1.043774000  | -0.266563000 |
| H | -5.311008000 | -2.812340000 | 1.563967000  |
| C | 1.168036000  | -1.954112000 | -2.456648000 |
| C | 1.540354000  | -0.982257000 | -3.385689000 |
| C | 1.471740000  | -3.303680000 | -2.611027000 |
| C | 2.237887000  | -1.401285000 | -4.507744000 |
| C | 2.173476000  | -3.666783000 | -3.757773000 |
| C | 2.565593000  | -2.738844000 | -4.710180000 |
| H | 2.540537000  | -0.659803000 | -5.240742000 |
| H | 2.426564000  | -4.712979000 | -3.896566000 |
| C | 1.249367000  | 0.467030000  | -3.158173000 |
| H | 0.191908000  | 0.651161000  | -2.948017000 |
| H | 1.825555000  | 0.825655000  | -2.300839000 |
| H | 1.525332000  | 1.056295000  | -4.032703000 |
| C | 1.138523000  | -4.323339000 | -1.571799000 |
| H | 1.867991000  | -4.221071000 | -0.751111000 |
| H | 0.133175000  | -4.194559000 | -1.162499000 |
| H | 1.209965000  | -5.329149000 | -1.987080000 |
| C | 3.351358000  | -3.156859000 | -5.915727000 |
| H | 3.038711000  | -2.607273000 | -6.806168000 |
| H | 4.417419000  | -2.958871000 | -5.768688000 |
| H | 3.239480000  | -4.223820000 | -6.113749000 |
| C | -2.886717000 | 1.210376000  | -1.042652000 |
| H | -1.931452000 | 1.477886000  | -0.586069000 |
| H | -2.683646000 | 0.943346000  | -2.083931000 |
| H | -3.521693000 | 2.095992000  | -1.048450000 |
| C | -2.699842000 | -3.344728000 | 1.126637000  |
| H | -2.305345000 | -3.865201000 | 0.249730000  |
| H | -1.844249000 | -3.101225000 | 1.760863000  |
| H | -3.337785000 | -4.040983000 | 1.670017000  |
| C | -7.002078000 | -0.757280000 | 1.057771000  |
| H | -7.501268000 | -1.726832000 | 1.014227000  |
| H | -7.111180000 | -0.380187000 | 2.079169000  |
| H | -7.529456000 | -0.069103000 | 0.395768000  |
| H | -1.528181000 | -1.917812000 | -2.253086000 |

**IMes-III-C** Etot = -1382.162867539127 a.u.

|   |              |              |              |
|---|--------------|--------------|--------------|
| C | -1.822071000 | -1.502904000 | -0.198091000 |
| C | -2.610288000 | 0.207494000  | -1.352745000 |
| H | -3.369730000 | 0.835295000  | -1.775595000 |
| C | -1.201019000 | 0.307828000  | -1.424274000 |
| H | 1.445145000  | 0.721610000  | -2.542651000 |
| N | -2.920257000 | -0.897410000 | -0.607713000 |
| N | -0.753925000 | -0.807844000 | -0.666040000 |
| C | 0.573549000  | -1.290732000 | -0.483287000 |
| C | 1.383789000  | -0.726695000 | 0.504181000  |
| C | 1.019986000  | -2.339818000 | -1.286790000 |
| C | 2.660911000  | -1.243478000 | 0.676157000  |
| C | 2.309116000  | -2.826040000 | -1.077082000 |
| C | 3.142504000  | -2.293926000 | -0.098638000 |
| H | 3.301020000  | -0.807595000 | 1.437295000  |
| H | 2.667124000  | -3.643238000 | -1.696695000 |
| C | -4.249062000 | -1.313420000 | -0.285055000 |
| C | -4.926337000 | -2.149078000 | -1.173355000 |
| C | -4.830803000 | -0.846191000 | 0.891412000  |
| C | -6.223053000 | -2.522519000 | -0.845062000 |
| C | -6.131198000 | -1.251269000 | 1.173382000  |
| C | -6.840754000 | -2.088842000 | 0.323093000  |
| H | -6.768582000 | -3.165874000 | -1.528715000 |
| H | -6.603873000 | -0.889849000 | 2.081467000  |
| C | -4.089247000 | 0.054874000  | 1.831377000  |
| H | -3.431312000 | -0.519887000 | 2.489960000  |
| H | -3.468721000 | 0.773842000  | 1.293619000  |
| H | -4.787132000 | 0.605122000  | 2.463145000  |
| C | -4.281859000 | -2.639638000 | -2.433720000 |
| H | -3.747101000 | -1.839988000 | -2.949614000 |
| H | -3.555967000 | -3.429996000 | -2.221322000 |
| H | -5.030360000 | -3.050225000 | -3.111533000 |
| C | 0.900879000  | 0.428827000  | 1.318189000  |
| H | 0.788100000  | 1.307614000  | 0.677796000  |
| H | -0.074899000 | 0.225076000  | 1.765613000  |
| H | 1.605244000  | 0.664430000  | 2.116364000  |
| C | 0.155861000  | -2.907736000 | -2.370857000 |
| H | -0.706950000 | -3.439595000 | -1.959147000 |
| H | -0.233633000 | -2.118290000 | -3.017850000 |
| H | 0.720682000  | -3.608909000 | -2.985490000 |
| C | 4.512180000  | -2.855950000 | 0.136518000  |
| H | 4.500644000  | -3.573171000 | 0.963057000  |
| H | 4.886241000  | -3.379409000 | -0.744970000 |
| H | 5.225551000  | -2.072120000 | 0.398672000  |
| C | -8.233847000 | -2.527461000 | 0.659096000  |
| H | -8.229680000 | -3.526407000 | 1.105869000  |

|   |              |              |              |
|---|--------------|--------------|--------------|
| H | -8.703333000 | -1.849632000 | 1.373395000  |
| H | -8.861962000 | -2.573734000 | -0.232673000 |
| H | -1.776309000 | -2.373845000 | 0.430038000  |
| O | 2.824037000  | -0.383329000 | -3.312563000 |
| C | 4.030081000  | 0.354056000  | -3.313948000 |
| H | 4.898935000  | -0.291001000 | -3.485672000 |
| H | 3.967020000  | 1.070835000  | -4.132609000 |
| H | 4.172838000  | 0.906793000  | -2.379138000 |
| C | -0.381562000 | 1.221869000  | -2.055478000 |
| O | 0.986778000  | 1.193434000  | -1.828542000 |
| C | -0.848813000 | 2.304311000  | -2.849526000 |
| C | -0.174768000 | 3.325729000  | -3.477695000 |
| O | -2.184827000 | 2.428561000  | -3.098589000 |
| C | -1.160405000 | 4.106844000  | -4.142958000 |
| H | 0.888954000  | 3.489362000  | -3.444891000 |
| C | -2.356385000 | 3.531378000  | -3.887688000 |
| H | -0.999111000 | 4.992866000  | -4.737702000 |
| H | -3.371174000 | 3.758898000  | -4.166102000 |
| H | 2.850999000  | -1.026668000 | -2.594005000 |

**IMes-IV-C** Etot = -1725.305968840181 a.u.

|   |              |              |              |
|---|--------------|--------------|--------------|
| C | 0.546636000  | -1.318228000 | 0.077691000  |
| C | -0.552775000 | 0.584556000  | -0.165186000 |
| C | 0.774145000  | 0.852051000  | -0.015865000 |
| H | 1.292915000  | 1.791956000  | 0.041192000  |
| N | -0.663414000 | -0.797062000 | -0.102215000 |
| N | 1.440043000  | -0.339825000 | 0.130106000  |
| C | 2.852051000  | -0.506076000 | 0.317531000  |
| C | 3.691118000  | -0.331360000 | -0.784197000 |
| C | 3.329948000  | -0.826858000 | 1.588130000  |
| C | 5.055601000  | -0.486647000 | -0.583359000 |
| C | 4.706693000  | -0.969038000 | 1.728455000  |
| C | 5.582870000  | -0.800120000 | 0.664665000  |
| H | 5.724335000  | -0.361674000 | -1.429227000 |
| H | 5.102103000  | -1.215902000 | 2.708536000  |
| C | -1.827639000 | -1.646627000 | -0.179125000 |
| C | -2.269305000 | -2.061277000 | -1.431025000 |
| C | -2.416557000 | -2.067736000 | 1.011537000  |
| C | -3.357421000 | -2.924716000 | -1.470793000 |
| C | -3.499415000 | -2.930810000 | 0.911815000  |
| C | -3.988810000 | -3.364485000 | -0.314922000 |
| H | -3.721687000 | -3.257506000 | -2.437654000 |
| H | -3.980718000 | -3.264937000 | 1.825604000  |
| C | -1.929229000 | -1.590801000 | 2.343398000  |
| H | -0.910126000 | -1.928857000 | 2.552860000  |

|   |              |              |              |
|---|--------------|--------------|--------------|
| H | -1.913538000 | -0.498753000 | 2.400780000  |
| H | -2.571291000 | -1.968505000 | 3.138890000  |
| C | -1.619410000 | -1.591175000 | -2.694882000 |
| H | -1.725246000 | -0.509774000 | -2.818357000 |
| H | -0.548263000 | -1.814327000 | -2.709988000 |
| H | -2.071972000 | -2.076996000 | -3.559142000 |
| C | 3.156780000  | 0.013696000  | -2.141272000 |
| H | 2.294794000  | -0.600679000 | -2.411186000 |
| H | 2.834678000  | 1.057669000  | -2.191241000 |
| H | 3.926027000  | -0.129596000 | -2.899839000 |
| C | 2.417974000  | -1.013973000 | 2.760289000  |
| H | 1.668331000  | -0.218568000 | 2.844288000  |
| H | 1.880936000  | -1.965984000 | 2.694270000  |
| H | 2.997941000  | -1.039121000 | 3.683149000  |
| C | 7.062774000  | -0.927795000 | 0.858492000  |
| H | 7.519550000  | 0.056490000  | 0.999328000  |
| H | 7.299146000  | -1.528434000 | 1.737731000  |
| H | 7.540008000  | -1.386080000 | -0.009750000 |
| C | -5.187847000 | -4.259953000 | -0.387677000 |
| H | -5.233121000 | -4.936385000 | 0.467746000  |
| H | -6.109185000 | -3.669506000 | -0.386143000 |
| H | -5.184198000 | -4.858933000 | -1.299861000 |
| C | -1.717496000 | 1.541802000  | -0.294865000 |
| O | -2.901185000 | 0.908342000  | 0.048805000  |
| H | -2.915676000 | 1.140723000  | 1.029879000  |
| C | -1.774170000 | 2.082329000  | -1.683974000 |
| C | -0.858595000 | 2.199781000  | -2.685339000 |
| O | -2.939076000 | 2.644839000  | -2.066377000 |
| C | -1.510213000 | 2.891856000  | -3.747925000 |
| H | 0.157219000  | 1.839764000  | -2.670401000 |
| C | -2.767825000 | 3.133826000  | -3.311648000 |
| H | -1.097835000 | 3.166620000  | -4.705627000 |
| H | -3.625937000 | 3.614428000  | -3.750970000 |
| C | -1.505150000 | 2.647717000  | 0.875382000  |
| O | -1.932759000 | 2.041132000  | 2.001835000  |
| H | -0.426764000 | 2.899271000  | 0.869549000  |
| C | -2.248234000 | 3.912704000  | 0.591532000  |
| C | -3.399019000 | 4.420733000  | 1.094919000  |
| O | -1.716394000 | 4.777920000  | -0.311366000 |
| C | -3.598506000 | 5.678275000  | 0.451928000  |
| H | -4.011211000 | 3.943618000  | 1.841675000  |
| C | -2.550483000 | 5.840114000  | -0.389163000 |
| H | -4.410365000 | 6.372865000  | 0.600688000  |
| H | -2.259424000 | 6.623052000  | -1.069940000 |
| H | -0.684678000 | 1.590546000  | 2.794583000  |
| O | 0.177689000  | 1.310313000  | 3.252653000  |

|   |              |              |             |
|---|--------------|--------------|-------------|
| C | 0.324859000  | 2.062783000  | 4.421201000 |
| H | 0.350039000  | 3.143571000  | 4.224158000 |
| H | -0.482404000 | 1.877140000  | 5.143723000 |
| H | 1.270434000  | 1.790542000  | 4.902470000 |
| H | 0.760261000  | -2.369901000 | 0.163333000 |

**IMes-V-C** Etot = -1725.305416199688 a.u.

|   |              |              |              |
|---|--------------|--------------|--------------|
| C | 0.389567000  | -1.600905000 | -0.148060000 |
| C | -0.773166000 | 0.276638000  | -0.239028000 |
| C | 0.552835000  | 0.577359000  | -0.131708000 |
| H | 1.049539000  | 1.531297000  | -0.092866000 |
| N | -0.840501000 | -1.105738000 | -0.243575000 |
| N | 1.259962000  | -0.601143000 | -0.079357000 |
| C | 2.681148000  | -0.736939000 | 0.042151000  |
| C | 3.435473000  | -0.953879000 | -1.110361000 |
| C | 3.254139000  | -0.637052000 | 1.309818000  |
| C | 4.811337000  | -1.075539000 | -0.962138000 |
| C | 4.634341000  | -0.766930000 | 1.399647000  |
| C | 5.428830000  | -0.983192000 | 0.279771000  |
| H | 5.417035000  | -1.245427000 | -1.846673000 |
| H | 5.100230000  | -0.698210000 | 2.377454000  |
| C | -1.974967000 | -2.001666000 | -0.301488000 |
| C | -2.492646000 | -2.356218000 | -1.542849000 |
| C | -2.425623000 | -2.554522000 | 0.894916000  |
| C | -3.514436000 | -3.296656000 | -1.558266000 |
| C | -3.451198000 | -3.486662000 | 0.819209000  |
| C | -4.011699000 | -3.866307000 | -0.394607000 |
| H | -3.948294000 | -3.569814000 | -2.514582000 |
| H | -3.828457000 | -3.920436000 | 1.740112000  |
| C | -1.855389000 | -2.146518000 | 2.219229000  |
| H | -0.819193000 | -2.481368000 | 2.339162000  |
| H | -1.870564000 | -1.060224000 | 2.343601000  |
| H | -2.432780000 | -2.589463000 | 3.030775000  |
| C | -2.038058000 | -1.714542000 | -2.814039000 |
| H | -2.570769000 | -0.769575000 | -2.956721000 |
| H | -0.966177000 | -1.504223000 | -2.821775000 |
| H | -2.266526000 | -2.354527000 | -3.666907000 |
| C | 2.797496000  | -1.062306000 | -2.461854000 |
| H | 2.257496000  | -2.006561000 | -2.576929000 |
| H | 2.079321000  | -0.258789000 | -2.638955000 |
| H | 3.554018000  | -1.019165000 | -3.244867000 |
| C | 2.422252000  | -0.403546000 | 2.533388000  |
| H | 1.921460000  | 0.567352000  | 2.503605000  |
| H | 1.638723000  | -1.157732000 | 2.640958000  |
| H | 3.043249000  | -0.432729000 | 3.428037000  |

|   |              |              |              |
|---|--------------|--------------|--------------|
| C | 6.917940000  | -1.086535000 | 0.403897000  |
| H | 7.385993000  | -0.109360000 | 0.250954000  |
| H | 7.211680000  | -1.438929000 | 1.393622000  |
| H | 7.333506000  | -1.767044000 | -0.341084000 |
| C | -5.151176000 | -4.837862000 | -0.446031000 |
| H | -5.198467000 | -5.447463000 | 0.457828000  |
| H | -6.103164000 | -4.306369000 | -0.537885000 |
| H | -5.068175000 | -5.505010000 | -1.306444000 |
| C | -2.003429000 | 1.183936000  | -0.288786000 |
| O | -3.129362000 | 0.468622000  | -0.175221000 |
| H | -3.096919000 | 0.778834000  | 1.440113000  |
| C | -1.911307000 | 2.004049000  | -1.554996000 |
| C | -0.959766000 | 2.205993000  | -2.507807000 |
| O | -3.015430000 | 2.713171000  | -1.869617000 |
| C | -1.522199000 | 3.103979000  | -3.462617000 |
| H | 0.022942000  | 1.765597000  | -2.540731000 |
| C | -2.770856000 | 3.372978000  | -3.018914000 |
| H | -1.061553000 | 3.486593000  | -4.359426000 |
| H | -3.577237000 | 3.979977000  | -3.395315000 |
| C | -1.894057000 | 2.109931000  | 1.042319000  |
| O | -2.501321000 | 1.338225000  | 2.025240000  |
| H | -0.835266000 | 2.274469000  | 1.279718000  |
| C | -2.549400000 | 3.437882000  | 0.923610000  |
| C | -3.764319000 | 3.903459000  | 1.302452000  |
| O | -1.837525000 | 4.427770000  | 0.326906000  |
| C | -3.811327000 | 5.270870000  | 0.899903000  |
| H | -4.525196000 | 3.330311000  | 1.805052000  |
| C | -2.620144000 | 5.531557000  | 0.313323000  |
| H | -4.623277000 | 5.968169000  | 1.033784000  |
| H | -2.189791000 | 6.412148000  | -0.133901000 |
| O | -4.805388000 | -0.049927000 | -2.174021000 |
| C | -5.956613000 | 0.735948000  | -2.089330000 |
| H | -6.545026000 | 0.524335000  | -1.184199000 |
| H | -5.733318000 | 1.811789000  | -2.095957000 |
| H | -6.589620000 | 0.517805000  | -2.954848000 |
| H | -4.209256000 | 0.180019000  | -1.417381000 |
| H | 0.633108000  | -2.649477000 | -0.122722000 |

**VI...IMes-I(H)-C**

Etot = -1725.287948318512 a.u.

|   |              |              |              |
|---|--------------|--------------|--------------|
| C | 0.240456000  | -2.162864000 | 0.456821000  |
| C | -0.854693000 | -0.264159000 | 0.116905000  |
| C | 0.356833000  | -0.184574000 | -0.493564000 |
| H | 0.791478000  | 0.602713000  | -1.091070000 |
| N | -0.896840000 | -1.515123000 | 0.701110000  |
| N | 1.023169000  | -1.372562000 | -0.272286000 |

|   |              |              |              |
|---|--------------|--------------|--------------|
| C | 2.336155000  | -1.702530000 | -0.735744000 |
| C | 2.534792000  | -1.881421000 | -2.106696000 |
| C | 3.372195000  | -1.808053000 | 0.191428000  |
| C | 3.818539000  | -2.200321000 | -2.529392000 |
| C | 4.636678000  | -2.128769000 | -0.288967000 |
| C | 4.880199000  | -2.329412000 | -1.641093000 |
| H | 3.991131000  | -2.351895000 | -3.590397000 |
| H | 5.455894000  | -2.213326000 | 0.418163000  |
| C | -2.001683000 | -2.059100000 | 1.435006000  |
| C | -2.672865000 | -3.165245000 | 0.914537000  |
| C | -2.382014000 | -1.441891000 | 2.628853000  |
| C | -3.735946000 | -3.678920000 | 1.647839000  |
| C | -3.450159000 | -2.001078000 | 3.318802000  |
| C | -4.137445000 | -3.113848000 | 2.850837000  |
| H | -4.273914000 | -4.536071000 | 1.254967000  |
| H | -3.759553000 | -1.537477000 | 4.250206000  |
| C | -1.714675000 | -0.205381000 | 3.136006000  |
| H | -0.625724000 | -0.266367000 | 3.062108000  |
| H | -2.046239000 | 0.658404000  | 2.540175000  |
| H | -1.977571000 | -0.036257000 | 4.180733000  |
| C | -2.308566000 | -3.780778000 | -0.404682000 |
| H | -2.074803000 | -3.020913000 | -1.153569000 |
| H | -1.443694000 | -4.446767000 | -0.328526000 |
| H | -3.140220000 | -4.377171000 | -0.780402000 |
| C | 1.423075000  | -1.721773000 | -3.097003000 |
| H | 0.508665000  | -2.219539000 | -2.766150000 |
| H | 1.178190000  | -0.665391000 | -3.248846000 |
| H | 1.711726000  | -2.143954000 | -4.059729000 |
| C | 3.158248000  | -1.573746000 | 1.657043000  |
| H | 2.496617000  | -0.724513000 | 1.839515000  |
| H | 2.714693000  | -2.444269000 | 2.149174000  |
| H | 4.110053000  | -1.373937000 | 2.149406000  |
| C | 6.258101000  | -2.644785000 | -2.137852000 |
| H | 6.741167000  | -1.746658000 | -2.534375000 |
| H | 6.890876000  | -3.034406000 | -1.339326000 |
| H | 6.230971000  | -3.380479000 | -2.944064000 |
| C | -5.310490000 | -3.660675000 | 3.605922000  |
| H | -5.134353000 | -3.639568000 | 4.683268000  |
| H | -6.206002000 | -3.062613000 | 3.412043000  |
| H | -5.530011000 | -4.688795000 | 3.314115000  |
| C | -2.348422000 | 2.999550000  | -1.073048000 |
| O | -1.542762000 | 2.221335000  | -1.553206000 |
| H | -1.693622000 | 0.494904000  | 0.229359000  |
| C | -2.424378000 | 4.373364000  | -1.570905000 |
| C | -3.126656000 | 5.477938000  | -1.182191000 |
| O | -1.635380000 | 4.694481000  | -2.634751000 |

|   |              |              |              |
|---|--------------|--------------|--------------|
| C | -2.752077000 | 6.528250000  | -2.055889000 |
| H | -3.836006000 | 5.519587000  | -0.372814000 |
| C | -1.846354000 | 5.987414000  | -2.911864000 |
| H | -3.104147000 | 7.547264000  | -2.052482000 |
| H | -1.288301000 | 6.393031000  | -3.740525000 |
| C | -3.275745000 | 2.564813000  | 0.092284000  |
| O | -2.808595000 | 1.511572000  | 0.760129000  |
| H | -3.393902000 | 3.485186000  | 0.714215000  |
| C | -4.643133000 | 2.299793000  | -0.510875000 |
| C | -5.307349000 | 1.132160000  | -0.693873000 |
| O | -5.415647000 | 3.337929000  | -0.928775000 |
| C | -6.570570000 | 1.470693000  | -1.265586000 |
| H | -4.928159000 | 0.161942000  | -0.420786000 |
| C | -6.580791000 | 2.818199000  | -1.385298000 |
| H | -7.368747000 | 0.800643000  | -1.545020000 |
| H | -7.305769000 | 3.526067000  | -1.752116000 |
| O | 0.788314000  | 1.833649000  | -2.927046000 |
| C | 1.433566000  | 2.968149000  | -3.444176000 |
| H | 0.885649000  | 3.404255000  | -4.288752000 |
| H | 1.572424000  | 3.749902000  | -2.686802000 |
| H | 2.419231000  | 2.661606000  | -3.801110000 |
| H | -0.086858000 | 2.096107000  | -2.582342000 |
| H | 0.487929000  | -3.155863000 | 0.789092000  |

[IPrH]<sup>+</sup> Etot = -1159.555789437028 a.u.

|   |              |              |              |
|---|--------------|--------------|--------------|
| C | -0.004759000 | -0.002413000 | -0.134173000 |
| C | 0.661983000  | 0.020719000  | 1.960596000  |
| H | 1.369087000  | 0.031035000  | 2.772744000  |
| C | -0.692565000 | 0.017014000  | 1.953769000  |
| H | -1.407894000 | 0.023511000  | 2.758712000  |
| N | 1.069328000  | 0.008754000  | 0.647161000  |
| N | -1.086655000 | 0.001914000  | 0.636315000  |
| C | -2.445382000 | -0.006730000 | 0.162171000  |
| C | -3.068215000 | 1.221167000  | -0.078349000 |
| C | -3.070601000 | -1.242588000 | -0.026033000 |
| C | -4.382367000 | 1.182109000  | -0.534901000 |
| C | -4.384726000 | -1.220397000 | -0.483681000 |
| C | -5.033425000 | -0.023312000 | -0.735446000 |
| H | -4.901440000 | 2.112106000  | -0.737173000 |
| H | -4.905498000 | -2.157125000 | -0.646587000 |
| C | 2.432374000  | 0.007460000  | 0.185428000  |
| C | 3.057957000  | -1.225333000 | -0.020948000 |
| C | 3.058360000  | 1.239048000  | -0.026232000 |
| C | 4.375481000  | -1.195874000 | -0.468296000 |
| C | 4.376058000  | 1.207189000  | -0.473038000 |

|   |              |              |              |
|---|--------------|--------------|--------------|
| C | 5.027288000  | 0.005091000  | -0.692048000 |
| H | 4.896532000  | -2.129876000 | -0.645296000 |
| H | 4.897432000  | 2.140302000  | -0.653782000 |
| C | 2.365516000  | 2.565667000  | 0.194428000  |
| H | 1.369025000  | 2.375151000  | 0.599821000  |
| C | 2.364543000  | -2.550583000 | 0.205969000  |
| H | 1.370317000  | -2.357641000 | 0.615778000  |
| C | -2.376473000 | 2.551134000  | 0.124818000  |
| H | -1.380099000 | 2.366642000  | 0.533194000  |
| C | -2.380545000 | -2.564078000 | 0.231225000  |
| H | -1.385056000 | -2.364588000 | 0.634721000  |
| H | 0.000827000  | -0.013898000 | -1.212518000 |
| H | -6.057368000 | -0.029836000 | -1.092295000 |
| H | 6.053850000  | 0.004179000  | -1.041358000 |
| C | -3.132445000 | -3.393692000 | 1.269876000  |
| H | -4.128185000 | -3.667755000 | 0.912420000  |
| H | -2.585526000 | -4.316840000 | 1.476356000  |
| H | -3.246725000 | -2.846377000 | 2.208418000  |
| C | -2.196958000 | -3.345641000 | -1.068967000 |
| H | -1.625959000 | -2.769930000 | -1.801303000 |
| H | -1.661621000 | -4.278024000 | -0.873223000 |
| H | -3.162969000 | -3.598274000 | -1.513958000 |
| C | -3.124614000 | 3.420711000  | 1.133146000  |
| H | -4.121955000 | 3.680217000  | 0.769370000  |
| H | -3.234549000 | 2.910407000  | 2.092810000  |
| H | -2.577215000 | 4.351375000  | 1.301044000  |
| C | -2.196277000 | 3.281534000  | -1.205269000 |
| H | -1.630696000 | 2.675996000  | -1.917457000 |
| H | -3.163388000 | 3.520309000  | -1.655463000 |
| H | -1.656977000 | 4.218935000  | -1.048317000 |
| C | 3.114096000  | -3.406995000 | 1.224411000  |
| H | 3.227788000  | -2.883504000 | 2.176487000  |
| H | 2.564737000  | -4.333769000 | 1.406879000  |
| H | 4.109692000  | -3.674634000 | 0.861889000  |
| C | 2.177878000  | -3.300842000 | -1.112151000 |
| H | 3.143198000  | -3.546029000 | -1.562830000 |
| H | 1.639587000  | -4.235884000 | -0.938271000 |
| H | 1.608824000  | -2.706501000 | -1.830932000 |
| C | 3.111902000  | 3.423059000  | 1.214398000  |
| H | 3.219977000  | 2.901757000  | 2.168334000  |
| H | 4.109813000  | 3.687429000  | 0.855807000  |
| H | 2.563822000  | 4.351549000  | 1.391937000  |
| C | 2.185949000  | 3.313395000  | -1.126120000 |
| H | 3.153574000  | 3.557298000  | -1.572501000 |
| H | 1.620043000  | 2.717930000  | -1.846437000 |
| H | 1.647365000  | 4.249087000  | -0.956693000 |

**IPr-I-A** Etot = -1159.060194166290 a.u.

|   |              |              |              |
|---|--------------|--------------|--------------|
| C | -0.005321000 | -0.004520000 | -0.270985000 |
| C | 0.660568000  | 0.019563000  | 1.912940000  |
| H | 1.366813000  | 0.029381000  | 2.726914000  |
| C | -0.688759000 | 0.017446000  | 1.907536000  |
| H | -1.401518000 | 0.025067000  | 2.715833000  |
| N | 1.048170000  | 0.006108000  | 0.586664000  |
| N | -1.065683000 | 0.002739000  | 0.578209000  |
| C | -2.427733000 | -0.004165000 | 0.144638000  |
| C | -3.072344000 | 1.218764000  | -0.075193000 |
| C | -3.071161000 | -1.233667000 | -0.039054000 |
| C | -4.398451000 | 1.185307000  | -0.498466000 |
| C | -4.397286000 | -1.213972000 | -0.463066000 |
| C | -5.056470000 | -0.017757000 | -0.691545000 |
| H | -4.922532000 | 2.117332000  | -0.680379000 |
| H | -4.920451000 | -2.151430000 | -0.617611000 |
| C | 2.413638000  | 0.004015000  | 0.163909000  |
| C | 3.060389000  | -1.223252000 | -0.022961000 |
| C | 3.058112000  | 1.229373000  | -0.042298000 |
| C | 4.389842000  | -1.198666000 | -0.436182000 |
| C | 4.387690000  | 1.200806000  | -0.454912000 |
| C | 5.049058000  | 0.000066000  | -0.650984000 |
| H | 4.915594000  | -2.134290000 | -0.593020000 |
| H | 4.911720000  | 2.134847000  | -0.626284000 |
| C | 2.361258000  | 2.557504000  | 0.158011000  |
| H | 1.347620000  | 2.357140000  | 0.510940000  |
| C | 2.366072000  | -2.549311000 | 0.198613000  |
| H | 1.352831000  | -2.345189000 | 0.550522000  |
| C | -2.379573000 | 2.549347000  | 0.122916000  |
| H | -1.367774000 | 2.352835000  | 0.483187000  |
| C | -2.376894000 | -2.557168000 | 0.197644000  |
| H | -1.365471000 | -2.349191000 | 0.552498000  |
| H | -6.089473000 | -0.023119000 | -1.022237000 |
| H | 6.084705000  | -0.001518000 | -0.973340000 |
| C | -3.084847000 | -3.375244000 | 1.275868000  |
| H | -4.098974000 | -3.643811000 | 0.968078000  |
| H | -2.536990000 | -4.301938000 | 1.465478000  |
| H | -3.152066000 | -2.820459000 | 2.214855000  |
| C | -2.251317000 | -3.354626000 | -1.099498000 |
| H | -1.710670000 | -2.787956000 | -1.861363000 |
| H | -1.709551000 | -4.286732000 | -0.918332000 |
| H | -3.235324000 | -3.610749000 | -1.501677000 |
| C | -3.087896000 | 3.397297000  | 1.177555000  |
| H | -4.102657000 | 3.655326000  | 0.862954000  |
| H | -3.153345000 | 2.869852000  | 2.132282000  |

|   |              |              |              |
|---|--------------|--------------|--------------|
| H | -2.541223000 | 4.329885000  | 1.339712000  |
| C | -2.255689000 | 3.309166000  | -1.196759000 |
| H | -1.717392000 | 2.720226000  | -1.943237000 |
| H | -3.240254000 | 3.554810000  | -1.604109000 |
| H | -1.712537000 | 4.245481000  | -1.043641000 |
| C | 3.069026000  | -3.376854000 | 1.272893000  |
| H | 3.131070000  | -2.830618000 | 2.217222000  |
| H | 2.520408000  | -4.305352000 | 1.451153000  |
| H | 4.084756000  | -3.642492000 | 0.967942000  |
| C | 2.247664000  | -3.334910000 | -1.106392000 |
| H | 3.234037000  | -3.587321000 | -1.505163000 |
| H | 1.704802000  | -4.268596000 | -0.937013000 |
| H | 1.711568000  | -2.761290000 | -1.866263000 |
| C | 3.060795000  | 3.402038000  | 1.221234000  |
| H | 3.121419000  | 2.870171000  | 2.173820000  |
| H | 4.076878000  | 3.664221000  | 0.914459000  |
| H | 2.510693000  | 4.332446000  | 1.384302000  |
| C | 2.244257000  | 3.323341000  | -1.158810000 |
| H | 3.231001000  | 3.571829000  | -1.559102000 |
| H | 1.711021000  | 2.737406000  | -1.911264000 |
| H | 1.699218000  | 4.258370000  | -1.004516000 |

**IPr-I(H)-A** Etot = -1274.716795483306 a.u.

|   |              |              |              |
|---|--------------|--------------|--------------|
| C | -1.814182000 | 0.352321000  | -0.223003000 |
| C | -2.572676000 | 2.063446000  | -1.512235000 |
| H | -3.298821000 | 2.761966000  | -1.894142000 |
| C | -1.266919000 | 1.888191000  | -1.806354000 |
| N | -2.879604000 | 1.121537000  | -0.550579000 |
| N | -0.830672000 | 0.846724000  | -1.011772000 |
| C | 0.510727000  | 0.349058000  | -1.019333000 |
| C | 1.460268000  | 0.963888000  | -0.195076000 |
| C | 0.826599000  | -0.726678000 | -1.857108000 |
| C | 2.760630000  | 0.467318000  | -0.225227000 |
| C | 2.139953000  | -1.188858000 | -1.847191000 |
| C | 3.099017000  | -0.598981000 | -1.041236000 |
| H | 3.518799000  | 0.923782000  | 0.401651000  |
| H | 2.414490000  | -2.022981000 | -2.483581000 |
| C | -4.176753000 | 0.977731000  | 0.035718000  |
| C | -5.077423000 | 0.071019000  | -0.534513000 |
| C | -4.500734000 | 1.759002000  | 1.151120000  |
| C | -6.335015000 | -0.045041000 | 0.051906000  |
| C | -5.772696000 | 1.609334000  | 1.696968000  |
| C | -6.681667000 | 0.715860000  | 1.155471000  |
| H | -7.054103000 | -0.741505000 | -0.365227000 |
| H | -6.054623000 | 2.202421000  | 2.559968000  |

|   |              |              |              |
|---|--------------|--------------|--------------|
| C | -3.532979000 | 2.751754000  | 1.757890000  |
| H | -2.572917000 | 2.644245000  | 1.248551000  |
| C | -4.733594000 | -0.766551000 | -1.747070000 |
| H | -3.713698000 | -0.522064000 | -2.050749000 |
| C | 1.122432000  | 2.133043000  | 0.704248000  |
| H | 0.052222000  | 2.331221000  | 0.615775000  |
| C | -0.194843000 | -1.385352000 | -2.758350000 |
| H | -1.151120000 | -0.878250000 | -2.614865000 |
| H | -1.788706000 | -1.130913000 | 0.838892000  |
| H | -0.619995000 | 2.402841000  | -2.497507000 |
| O | -1.791027000 | -1.951198000 | 1.417383000  |
| C | -1.445640000 | -1.564334000 | 2.724309000  |
| H | -2.209470000 | -1.889991000 | 3.440255000  |
| H | -0.489182000 | -2.006961000 | 3.030694000  |
| H | -1.350435000 | -0.475292000 | 2.810565000  |
| H | 4.117278000  | -0.972441000 | -1.049550000 |
| H | -7.667193000 | 0.612378000  | 1.596379000  |
| C | -0.396257000 | -2.854333000 | -2.391193000 |
| H | -1.171668000 | -3.297044000 | -3.021998000 |
| H | 0.522751000  | -3.428097000 | -2.538794000 |
| H | -0.701407000 | -2.964347000 | -1.347901000 |
| C | 0.188405000  | -1.237318000 | -4.229926000 |
| H | 1.130505000  | -1.747903000 | -4.446411000 |
| H | -0.584296000 | -1.675843000 | -4.866679000 |
| H | 0.302474000  | -0.186366000 | -4.505999000 |
| C | 1.864354000  | 3.395148000  | 0.266551000  |
| H | 1.577302000  | 4.240284000  | 0.897501000  |
| H | 2.946482000  | 3.264550000  | 0.353059000  |
| H | 1.636549000  | 3.650056000  | -0.771161000 |
| C | 1.406773000  | 1.813173000  | 2.170521000  |
| H | 0.854003000  | 0.929326000  | 2.497380000  |
| H | 2.471330000  | 1.629486000  | 2.337670000  |
| H | 1.110427000  | 2.654488000  | 2.802389000  |
| C | -3.294471000 | 2.477466000  | 3.241232000  |
| H | -4.208952000 | 2.614166000  | 3.824337000  |
| H | -2.936958000 | 1.457879000  | 3.404135000  |
| H | -2.543939000 | 3.168668000  | 3.633495000  |
| C | -4.014157000 | 4.185855000  | 1.539796000  |
| H | -4.142991000 | 4.404538000  | 0.477006000  |
| H | -4.971725000 | 4.357403000  | 2.039329000  |
| H | -3.289373000 | 4.894157000  | 1.949396000  |
| C | -5.653802000 | -0.443237000 | -2.922944000 |
| H | -5.358032000 | -1.021056000 | -3.802329000 |
| H | -6.693040000 | -0.692700000 | -2.692730000 |
| H | -5.609875000 | 0.617727000  | -3.181012000 |
| C | -4.767106000 | -2.258509000 | -1.419943000 |

|   |              |              |              |
|---|--------------|--------------|--------------|
| H | -5.767514000 | -2.573300000 | -1.110922000 |
| H | -4.489526000 | -2.842998000 | -2.301238000 |
| H | -4.068798000 | -2.502934000 | -0.616161000 |

**IPr-TS1-A**  $i149\text{ cm}^{-1}$  Etot = -1617.809969802293 a.u.

|   |              |              |              |
|---|--------------|--------------|--------------|
| H | -1.331504000 | 4.078821000  | 0.250352000  |
| C | -2.222391000 | 2.166688000  | 0.910371000  |
| C | -1.356535000 | 3.003312000  | 0.305128000  |
| N | -1.774255000 | 0.887120000  | 0.643036000  |
| C | -0.652321000 | 0.891849000  | -0.111764000 |
| N | -0.407206000 | 2.207301000  | -0.308892000 |
| H | -3.106179000 | 2.360009000  | 1.495326000  |
| H | 2.810677000  | -0.819707000 | 1.331568000  |
| O | 3.357627000  | -1.121889000 | 2.087988000  |
| C | 0.788510000  | -0.863224000 | -0.268717000 |
| O | 1.931173000  | -0.401736000 | -0.117492000 |
| C | 0.666214000  | 2.748500000  | -1.091931000 |
| C | 1.822717000  | 3.189097000  | -0.437627000 |
| C | 0.491813000  | 2.868886000  | -2.477324000 |
| C | 2.830772000  | 3.749736000  | -1.217645000 |
| C | 1.532981000  | 3.430781000  | -3.210727000 |
| C | 2.691510000  | 3.866086000  | -2.589615000 |
| H | 3.738426000  | 4.102431000  | -0.741873000 |
| H | 1.431886000  | 3.537762000  | -4.284231000 |
| C | -2.461475000 | -0.291022000 | 1.084377000  |
| C | -3.519602000 | -0.776987000 | 0.306329000  |
| C | -2.078978000 | -0.885756000 | 2.293544000  |
| C | -4.189044000 | -1.908784000 | 0.764170000  |
| C | -2.779129000 | -2.016882000 | 2.704011000  |
| C | -3.821267000 | -2.525987000 | 1.947358000  |
| H | -5.014752000 | -2.309001000 | 0.186900000  |
| H | -2.509331000 | -2.502538000 | 3.634464000  |
| C | 1.982610000  | 3.114784000  | 1.065429000  |
| H | 1.227311000  | 2.424794000  | 1.449697000  |
| C | -0.989934000 | -0.303486000 | 3.168862000  |
| H | -0.387151000 | 0.369554000  | 2.553933000  |
| C | -3.979782000 | -0.087795000 | -0.960673000 |
| H | -3.219987000 | 0.644497000  | -1.242388000 |
| C | -0.799986000 | 2.478640000  | -3.163700000 |
| H | -1.313677000 | 1.756180000  | -2.524980000 |
| H | 0.218559000  | -1.265678000 | 0.578924000  |
| C | 0.364073000  | -1.453601000 | -1.539868000 |
| C | -0.524643000 | -2.448499000 | -1.808139000 |
| O | 1.005672000  | -1.088088000 | -2.676254000 |
| C | -0.429010000 | -2.705644000 | -3.204937000 |

|   |              |              |              |
|---|--------------|--------------|--------------|
| H | -1.161856000 | -2.940126000 | -1.088980000 |
| C | 0.511351000  | -1.850067000 | -3.676479000 |
| H | -0.980273000 | -3.432319000 | -3.781194000 |
| H | 0.924000000  | -1.672800000 | -4.656891000 |
| C | 4.609099000  | -1.527561000 | 1.582960000  |
| H | 5.148302000  | -0.701520000 | 1.101886000  |
| H | 5.214008000  | -1.884178000 | 2.419286000  |
| H | 4.516913000  | -2.345152000 | 0.857117000  |
| H | 3.489686000  | 4.303477000  | -3.179529000 |
| H | -4.354665000 | -3.407465000 | 2.286206000  |
| C | 3.348167000  | 2.578880000  | 1.485700000  |
| H | 3.376148000  | 2.452559000  | 2.570924000  |
| H | 3.554424000  | 1.611281000  | 1.025406000  |
| H | 4.151848000  | 3.268446000  | 1.215967000  |
| C | 1.734466000  | 4.485344000  | 1.698545000  |
| H | 0.745138000  | 4.874905000  | 1.449001000  |
| H | 1.810451000  | 4.418646000  | 2.787049000  |
| H | 2.478718000  | 5.207704000  | 1.351114000  |
| C | -1.606479000 | 0.526175000  | 4.296998000  |
| H | -2.244631000 | 1.322919000  | 3.908219000  |
| H | -2.214514000 | -0.106866000 | 4.949540000  |
| H | -0.820503000 | 0.983149000  | 4.903908000  |
| C | -0.053611000 | -1.364249000 | 3.739322000  |
| H | -0.567188000 | -2.016864000 | 4.449485000  |
| H | 0.375739000  | -1.988571000 | 2.952443000  |
| H | 0.767774000  | -0.880975000 | 4.273600000  |
| C | -5.284896000 | 0.669603000  | -0.709776000 |
| H | -5.589794000 | 1.206596000  | -1.611780000 |
| H | -6.087314000 | -0.023142000 | -0.440755000 |
| H | -5.178940000 | 1.394691000  | 0.100420000  |
| C | -4.138505000 | -1.051656000 | -2.133104000 |
| H | -3.212415000 | -1.594485000 | -2.331772000 |
| H | -4.930634000 | -1.782099000 | -1.950695000 |
| H | -4.406369000 | -0.494698000 | -3.034556000 |
| C | -0.584687000 | 1.815339000  | -4.519773000 |
| H | -0.180644000 | 2.516510000  | -5.254160000 |
| H | 0.097301000  | 0.966177000  | -4.448580000 |
| H | -1.540391000 | 1.453493000  | -4.906820000 |
| C | -1.708486000 | 3.701393000  | -3.312495000 |
| H | -1.238036000 | 4.449743000  | -3.956852000 |
| H | -2.660466000 | 3.413307000  | -3.766282000 |
| H | -1.918397000 | 4.169405000  | -2.348427000 |

**IPr-II-A** Etot -1617.840101 a.u.

|   |              |              |             |
|---|--------------|--------------|-------------|
| C | -0.313375000 | -0.416613000 | 0.069480000 |
|---|--------------|--------------|-------------|

|   |              |              |              |
|---|--------------|--------------|--------------|
| C | -1.165630000 | -2.147880000 | -1.038625000 |
| C | 0.165842000  | -2.335102000 | -0.942328000 |
| N | -1.445722000 | -0.956642000 | -0.408781000 |
| N | 0.682918000  | -1.255200000 | -0.258918000 |
| C | 2.094259000  | -1.106115000 | -0.007290000 |
| C | 2.891226000  | -0.567288000 | -1.025533000 |
| C | 2.615907000  | -1.592375000 | 1.197041000  |
| C | 4.257688000  | -0.471925000 | -0.779152000 |
| C | 3.989224000  | -1.469207000 | 1.388285000  |
| C | 4.800385000  | -0.908146000 | 0.417053000  |
| H | 4.907166000  | -0.054335000 | -1.539009000 |
| H | 4.431640000  | -1.828343000 | 2.309642000  |
| C | -2.774694000 | -0.418303000 | -0.288904000 |
| C | -3.590355000 | -0.891206000 | 0.745306000  |
| C | -3.211085000 | 0.503808000  | -1.247814000 |
| C | -4.887725000 | -0.390457000 | 0.810796000  |
| C | -4.517155000 | 0.969914000  | -1.132833000 |
| C | -5.346096000 | 0.531091000  | -0.114313000 |
| H | -5.550203000 | -0.733858000 | 1.596749000  |
| H | -4.892972000 | 1.682850000  | -1.857217000 |
| C | -2.344586000 | 0.955605000  | -2.403239000 |
| H | -1.310497000 | 0.674589000  | -2.189945000 |
| C | -3.136308000 | -1.939669000 | 1.737816000  |
| H | -2.055374000 | -2.061145000 | 1.638409000  |
| C | 2.333890000  | -0.157836000 | -2.372728000 |
| H | 1.258987000  | 0.008827000  | -2.262430000 |
| C | 1.760306000  | -2.295432000 | 2.227785000  |
| H | 0.728433000  | -1.972562000 | 2.079537000  |
| C | -0.300515000 | 0.793138000  | 0.991232000  |
| O | -0.222003000 | 0.347488000  | 2.265145000  |
| H | -0.759417000 | 1.334542000  | 3.337356000  |
| C | 0.745747000  | 1.821259000  | 0.646974000  |
| C | 1.780479000  | 2.333275000  | 1.358290000  |
| O | 0.585995000  | 2.526558000  | -0.504224000 |
| C | 2.299100000  | 3.422008000  | 0.591638000  |
| H | 2.121279000  | 1.983307000  | 2.319214000  |
| C | 1.536787000  | 3.493627000  | -0.523849000 |
| H | 3.126751000  | 4.067550000  | 0.842764000  |
| H | 1.540203000  | 4.139995000  | -1.386798000 |
| O | -1.083090000 | 1.947896000  | 4.078419000  |
| C | -2.111658000 | 2.754850000  | 3.570636000  |
| H | -2.467119000 | 3.419035000  | 4.363902000  |
| H | -1.776642000 | 3.385823000  | 2.734687000  |
| H | -2.972384000 | 2.166963000  | 3.220185000  |
| H | -1.264659000 | 1.292674000  | 0.749149000  |
| C | 2.132509000  | -1.931198000 | 3.660944000  |

|   |              |              |              |
|---|--------------|--------------|--------------|
| H | 1.415580000  | -2.383924000 | 4.350338000  |
| H | 3.124010000  | -2.301840000 | 3.932941000  |
| H | 2.113869000  | -0.850448000 | 3.813493000  |
| C | 1.837137000  | -3.810896000 | 2.028276000  |
| H | 1.182426000  | -4.317951000 | 2.741953000  |
| H | 1.534206000  | -4.105617000 | 1.021011000  |
| H | 2.857753000  | -4.169325000 | 2.190990000  |
| C | -3.412873000 | -1.531747000 | 3.182566000  |
| H | -4.484640000 | -1.453771000 | 3.380641000  |
| H | -3.006213000 | -2.285299000 | 3.861538000  |
| H | -2.948662000 | -0.572742000 | 3.421118000  |
| C | -3.788692000 | -3.287168000 | 1.424401000  |
| H | -3.425098000 | -4.051058000 | 2.116377000  |
| H | -4.875288000 | -3.224080000 | 1.529769000  |
| H | -3.566604000 | -3.614799000 | 0.406185000  |
| C | -2.369983000 | 2.469055000  | -2.596603000 |
| H | -3.357385000 | 2.819167000  | -2.906715000 |
| H | -2.092443000 | 2.992927000  | -1.679848000 |
| H | -1.660824000 | 2.751731000  | -3.378368000 |
| C | -2.760887000 | 0.238575000  | -3.688794000 |
| H | -2.704612000 | -0.846916000 | -3.578742000 |
| H | -3.787820000 | 0.499337000  | -3.959426000 |
| H | -2.107109000 | 0.533511000  | -4.513517000 |
| C | 2.534712000  | -1.280380000 | -3.394492000 |
| H | 3.601500000  | -1.465494000 | -3.548396000 |
| H | 2.073564000  | -2.216590000 | -3.075492000 |
| H | 2.097700000  | -0.995969000 | -4.355110000 |
| C | 2.944166000  | 1.134899000  | -2.905400000 |
| H | 2.878264000  | 1.943838000  | -2.176411000 |
| H | 3.994880000  | 1.001661000  | -3.174365000 |
| H | 2.413520000  | 1.443624000  | -3.809307000 |
| H | -6.360863000 | 0.907171000  | -0.044704000 |
| H | 5.867755000  | -0.821777000 | 0.588745000  |
| H | -1.937169000 | -2.744283000 | -1.494738000 |
| H | 0.795469000  | -3.133966000 | -1.294111000 |

**IPr-TS2-A**  $i1107\text{ cm}^{-1}$  Etot = -1617.802519528987 a.u.

|   |              |              |              |
|---|--------------|--------------|--------------|
| C | -0.393455000 | -0.295381000 | 0.082781000  |
| C | -1.203416000 | -2.269081000 | -0.561610000 |
| H | -1.970557000 | -2.988377000 | -0.788779000 |
| C | 0.137855000  | -2.350658000 | -0.608408000 |
| H | 0.793801000  | -3.153739000 | -0.895639000 |
| N | -1.526820000 | -0.993580000 | -0.137749000 |
| N | 0.632425000  | -1.125772000 | -0.212322000 |
| C | 2.021807000  | -0.776816000 | -0.283998000 |

|   |              |              |              |
|---|--------------|--------------|--------------|
| C | 2.868242000  | -1.156386000 | 0.757593000  |
| C | 2.485872000  | -0.137573000 | -1.435541000 |
| C | 4.212823000  | -0.828191000 | 0.647875000  |
| C | 3.841214000  | 0.168092000  | -1.489393000 |
| C | 4.714728000  | -0.154161000 | -0.459187000 |
| H | 4.885187000  | -1.109392000 | 1.452351000  |
| H | 4.222714000  | 0.668802000  | -2.373653000 |
| C | -2.902053000 | -0.582768000 | -0.028285000 |
| C | -3.556570000 | -0.746449000 | 1.188661000  |
| C | -3.547904000 | -0.123077000 | -1.174342000 |
| C | -4.907291000 | -0.431029000 | 1.243664000  |
| C | -4.900279000 | 0.180231000  | -1.063034000 |
| C | -5.595516000 | 0.036920000  | 0.130704000  |
| H | -5.433060000 | -0.549297000 | 2.186197000  |
| H | -5.422065000 | 0.544256000  | -1.942665000 |
| C | -2.816558000 | 0.088717000  | -2.462024000 |
| H | -2.118816000 | 0.935315000  | -2.380687000 |
| H | -2.235362000 | -0.791156000 | -2.751575000 |
| H | -3.521559000 | 0.303168000  | -3.265850000 |
| C | -2.824630000 | -1.192553000 | 2.415272000  |
| H | -2.200606000 | -2.070457000 | 2.230935000  |
| H | -2.170383000 | -0.392008000 | 2.772971000  |
| H | -3.524603000 | -1.435399000 | 3.214968000  |
| C | 2.359389000  | -1.905072000 | 1.949893000  |
| H | 1.573576000  | -1.343021000 | 2.458817000  |
| H | 1.941211000  | -2.876236000 | 1.670599000  |
| H | 3.165548000  | -2.080232000 | 2.662176000  |
| C | 1.583489000  | 0.189856000  | -2.583542000 |
| H | 1.000604000  | -0.683707000 | -2.889853000 |
| H | 0.864822000  | 0.987186000  | -2.345692000 |
| H | 2.173076000  | 0.514358000  | -3.441295000 |
| C | 6.161795000  | 0.227199000  | -0.532220000 |
| H | 6.792752000  | -0.497827000 | -0.014805000 |
| H | 6.502193000  | 0.303837000  | -1.566112000 |
| H | 6.327977000  | 1.200563000  | -0.060204000 |
| C | -7.044826000 | 0.406680000  | 0.224733000  |
| H | -7.157763000 | 1.452267000  | 0.527528000  |
| H | -7.549368000 | 0.288816000  | -0.735756000 |
| H | -7.565892000 | -0.204985000 | 0.963599000  |
| C | -0.272018000 | 1.127648000  | 0.416126000  |
| O | -1.527516000 | 1.711209000  | 0.663471000  |
| C | 0.726932000  | 1.446964000  | 1.463960000  |
| H | -1.630317000 | 2.252311000  | -0.158619000 |
| C | 0.798742000  | 1.187456000  | 2.797419000  |
| O | 1.751705000  | 2.267960000  | 1.113235000  |
| C | 1.938399000  | 1.881901000  | 3.292155000  |

|   |              |             |              |
|---|--------------|-------------|--------------|
| H | 0.100152000  | 0.592749000 | 3.365005000  |
| C | 2.473836000  | 2.515733000 | 2.221082000  |
| H | 2.305665000  | 1.912543000 | 4.305645000  |
| H | 3.332032000  | 3.154914000 | 2.095262000  |
| H | -0.034581000 | 1.691090000 | -0.633189000 |
| O | -0.670736000 | 2.434046000 | -1.707815000 |
| C | -0.168260000 | 3.682561000 | -2.010115000 |
| H | 0.288410000  | 4.191585000 | -1.140592000 |
| H | 0.615281000  | 3.649730000 | -2.791280000 |
| H | -0.950667000 | 4.364054000 | -2.388075000 |

**IPr-III-A** Etot = -1617.829199060855 a.u.

|   |              |              |              |
|---|--------------|--------------|--------------|
| C | -0.363370000 | -0.340453000 | -0.013573000 |
| C | -1.147318000 | -2.248245000 | -0.952033000 |
| H | -1.892153000 | -2.953506000 | -1.278611000 |
| C | 0.184512000  | -2.269879000 | -1.064376000 |
| H | 0.843907000  | -3.014641000 | -1.475230000 |
| N | -1.503521000 | -1.067773000 | -0.310180000 |
| N | 0.686691000  | -1.105934000 | -0.488412000 |
| C | 2.085084000  | -0.942265000 | -0.255906000 |
| C | 2.913652000  | -0.639186000 | -1.346262000 |
| C | 2.598631000  | -1.167360000 | 1.027964000  |
| C | 4.282639000  | -0.546737000 | -1.117179000 |
| C | 3.973645000  | -1.039717000 | 1.208948000  |
| C | 4.810023000  | -0.731601000 | 0.149947000  |
| H | 4.946570000  | -0.319170000 | -1.943832000 |
| H | 4.397153000  | -1.207808000 | 2.193054000  |
| C | -2.848486000 | -0.586246000 | -0.323828000 |
| C | -3.754579000 | -1.084956000 | 0.621994000  |
| C | -3.238827000 | 0.313144000  | -1.324813000 |
| C | -5.073189000 | -0.645839000 | 0.555554000  |
| C | -4.565815000 | 0.736485000  | -1.337143000 |
| C | -5.476233000 | 0.264266000  | -0.407785000 |
| H | -5.795978000 | -1.019227000 | 1.272448000  |
| H | -4.893081000 | 1.436180000  | -2.098647000 |
| C | -2.293638000 | 0.805307000  | -2.399950000 |
| H | -1.311101000 | 0.365175000  | -2.220345000 |
| C | -3.344708000 | -2.088300000 | 1.677493000  |
| H | -2.253305000 | -2.140819000 | 1.677137000  |
| C | 2.374156000  | -0.432402000 | -2.745995000 |
| H | 1.283853000  | -0.403361000 | -2.683981000 |
| C | 1.735158000  | -1.608512000 | 2.190012000  |
| H | 0.690132000  | -1.541811000 | 1.884109000  |
| C | -0.344435000 | 0.860514000  | 0.669167000  |
| O | -1.465492000 | 1.138349000  | 1.456383000  |

|   |              |              |              |
|---|--------------|--------------|--------------|
| H | -1.429694000 | 1.075192000  | 3.310639000  |
| C | 0.654464000  | 1.876839000  | 0.708184000  |
| C | 0.783108000  | 2.966802000  | 1.538920000  |
| O | 1.618580000  | 1.932290000  | -0.248940000 |
| C | 1.899557000  | 3.711079000  | 1.058068000  |
| H | 0.162595000  | 3.195556000  | 2.389762000  |
| C | 2.376922000  | 3.042543000  | -0.016317000 |
| H | 2.300738000  | 4.625825000  | 1.468008000  |
| H | 3.203697000  | 3.199571000  | -0.689430000 |
| O | -1.509668000 | 0.942556000  | 4.271372000  |
| C | -1.069252000 | 2.106972000  | 4.935392000  |
| H | -1.237367000 | 1.965032000  | 6.004469000  |
| H | 0.000580000  | 2.291547000  | 4.779680000  |
| H | -1.624042000 | 2.997753000  | 4.617570000  |
| H | -1.945049000 | 1.893444000  | 1.091453000  |
| H | -6.507026000 | 0.600408000  | -0.438901000 |
| H | 5.879432000  | -0.646773000 | 0.310229000  |
| C | 2.020141000  | -3.069573000 | 2.540464000  |
| H | 1.360682000  | -3.400124000 | 3.347375000  |
| H | 1.860347000  | -3.723256000 | 1.679493000  |
| H | 3.053348000  | -3.196953000 | 2.875403000  |
| C | 1.909570000  | -0.713290000 | 3.413737000  |
| H | 1.692145000  | 0.330019000  | 3.173964000  |
| H | 1.229007000  | -1.029475000 | 4.208303000  |
| H | 2.927537000  | -0.768956000 | 3.808217000  |
| C | -3.786331000 | -1.672838000 | 3.078289000  |
| H | -4.875597000 | -1.664215000 | 3.168463000  |
| H | -3.401660000 | -2.384218000 | 3.813809000  |
| H | -3.413298000 | -0.680742000 | 3.339353000  |
| C | -3.881799000 | -3.480475000 | 1.342165000  |
| H | -3.547339000 | -3.817268000 | 0.358472000  |
| H | -3.541961000 | -4.206963000 | 2.085072000  |
| H | -4.975673000 | -3.481871000 | 1.344434000  |
| C | -2.751547000 | 0.345087000  | -3.783754000 |
| H | -2.840433000 | -0.742963000 | -3.830482000 |
| H | -3.722416000 | 0.776052000  | -4.042523000 |
| H | -2.031265000 | 0.661734000  | -4.542690000 |
| C | -2.131041000 | 2.323364000  | -2.359603000 |
| H | -1.409336000 | 2.644940000  | -3.115032000 |
| H | -3.078545000 | 2.828008000  | -2.566887000 |
| H | -1.773313000 | 2.659571000  | -1.383426000 |
| C | 2.762836000  | -1.597272000 | -3.657884000 |
| H | 2.331229000  | -1.459372000 | -4.652778000 |
| H | 3.849504000  | -1.655288000 | -3.767697000 |
| H | 2.413764000  | -2.554761000 | -3.265152000 |
| C | 2.832100000  | 0.889630000  | -3.358177000 |

|   |             |             |              |
|---|-------------|-------------|--------------|
| H | 2.546764000 | 1.737435000 | -2.733793000 |
| H | 3.916296000 | 0.913938000 | -3.494563000 |
| H | 2.373509000 | 1.019940000 | -4.341916000 |

**IPr-IV-A** Etot = -1960.940228049920 a.u.

|   |              |              |              |
|---|--------------|--------------|--------------|
| C | 0.671260000  | -1.701386000 | -0.292241000 |
| C | -0.469518000 | 0.215479000  | -0.276884000 |
| C | 0.807183000  | 0.499923000  | 0.034375000  |
| H | 1.291328000  | 1.432281000  | 0.269058000  |
| N | -0.551948000 | -1.143794000 | -0.472154000 |
| N | 1.501496000  | -0.684211000 | 0.025515000  |
| C | 2.907759000  | -0.664611000 | 0.380070000  |
| C | 3.841156000  | -0.347621000 | -0.608471000 |
| C | 3.248733000  | -0.808605000 | 1.730739000  |
| C | 5.173662000  | -0.230965000 | -0.214361000 |
| C | 4.589868000  | -0.673863000 | 2.067217000  |
| C | 5.547889000  | -0.397114000 | 1.105114000  |
| H | 5.924756000  | 0.009723000  | -0.957678000 |
| H | 4.889154000  | -0.782836000 | 3.103063000  |
| C | -1.864245000 | -1.718895000 | -0.712545000 |
| C | -2.384650000 | -1.710944000 | -2.010678000 |
| C | -2.627971000 | -2.100131000 | 0.403820000  |
| C | -3.667516000 | -2.226895000 | -2.188806000 |
| C | -3.903934000 | -2.596653000 | 0.165270000  |
| C | -4.413348000 | -2.681990000 | -1.119502000 |
| H | -4.093663000 | -2.246624000 | -3.184865000 |
| H | -4.514418000 | -2.912118000 | 1.002313000  |
| C | -2.150889000 | -1.921401000 | 1.830479000  |
| H | -1.060988000 | -1.848208000 | 1.825979000  |
| C | -1.687444000 | -1.079906000 | -3.194595000 |
| H | -0.665469000 | -0.835577000 | -2.902857000 |
| C | 3.471310000  | -0.069666000 | -2.048636000 |
| H | 2.429210000  | -0.356173000 | -2.198842000 |
| C | 2.224740000  | -1.059996000 | 2.814782000  |
| H | 1.296543000  | -1.382706000 | 2.339706000  |
| H | -1.336272000 | 0.846935000  | -0.370305000 |
| C | 1.140105000  | -3.163709000 | -0.403962000 |
| O | 2.262345000  | -3.327032000 | 0.387206000  |
| C | 1.488754000  | -3.477913000 | -1.826670000 |
| C | 0.053212000  | -4.189968000 | 0.291207000  |
| H | 1.797860000  | -3.834280000 | 1.176220000  |
| C | 1.374950000  | -2.839500000 | -3.018406000 |
| O | 2.109415000  | -4.669853000 | -2.012689000 |
| O | 0.523833000  | -4.403898000 | 1.545633000  |
| H | -0.915095000 | -3.678337000 | 0.264492000  |

|   |              |              |              |
|---|--------------|--------------|--------------|
| C | -0.132049000 | -5.464761000 | -0.469432000 |
| C | 1.944190000  | -3.700942000 | -4.002925000 |
| H | 0.959066000  | -1.862967000 | -3.190642000 |
| C | 2.373399000  | -4.794117000 | -3.333057000 |
| C | 0.193622000  | -6.752580000 | -0.193077000 |
| O | -0.804641000 | -5.404999000 | -1.648082000 |
| H | 2.028330000  | -3.519261000 | -5.063011000 |
| H | 2.871544000  | -5.702342000 | -3.632349000 |
| C | -0.295491000 | -7.536575000 | -1.282980000 |
| H | 0.716599000  | -7.096985000 | 0.684306000  |
| C | -0.888803000 | -6.668681000 | -2.135089000 |
| H | -0.219331000 | -8.605660000 | -1.410594000 |
| H | -1.400533000 | -6.782021000 | -3.077366000 |
| H | -0.000173000 | -5.550764000 | 2.595468000  |
| O | -0.275437000 | -6.203388000 | 3.294500000  |
| C | 0.140095000  | -5.707429000 | 4.542146000  |
| H | 1.231458000  | -5.600509000 | 4.606013000  |
| H | -0.308543000 | -4.731751000 | 4.773071000  |
| H | -0.172677000 | -6.411167000 | 5.317818000  |
| H | -5.409202000 | -3.078975000 | -1.281982000 |
| H | 6.589441000  | -0.298119000 | 1.390368000  |
| C | 2.644974000  | -2.169528000 | 3.774335000  |
| H | 1.830818000  | -2.379799000 | 4.472193000  |
| H | 2.882684000  | -3.091403000 | 3.240321000  |
| H | 3.517824000  | -1.881964000 | 4.365340000  |
| C | 1.933296000  | 0.229302000  | 3.585028000  |
| H | 1.588254000  | 1.027106000  | 2.923457000  |
| H | 1.160727000  | 0.052465000  | 4.337809000  |
| H | 2.832532000  | 0.581266000  | 4.098256000  |
| C | -2.519869000 | -3.089703000 | 2.738621000  |
| H | -3.599570000 | -3.158158000 | 2.889686000  |
| H | -2.161851000 | -4.039448000 | 2.338509000  |
| H | -2.062135000 | -2.943966000 | 3.719922000  |
| C | -2.705724000 | -0.615398000 | 2.405951000  |
| H | -2.327117000 | -0.463583000 | 3.419897000  |
| H | -2.424244000 | 0.251104000  | 1.804617000  |
| H | -3.797528000 | -0.654359000 | 2.452667000  |
| C | -1.634208000 | -2.004767000 | -4.407226000 |
| H | -1.034557000 | -1.546192000 | -5.197315000 |
| H | -1.190806000 | -2.970346000 | -4.158671000 |
| H | -2.633066000 | -2.181173000 | -4.813104000 |
| C | -2.371897000 | 0.239152000  | -3.562284000 |
| H | -3.402995000 | 0.064359000  | -3.880375000 |
| H | -2.390603000 | 0.933472000  | -2.719334000 |
| H | -1.838963000 | 0.717837000  | -4.387671000 |
| C | 4.315608000  | -0.880990000 | -3.027358000 |

|   |             |              |              |
|---|-------------|--------------|--------------|
| H | 4.25545000  | -1.949914000 | -2.815055000 |
| H | 3.959733000 | -0.717712000 | -4.047576000 |
| H | 5.365736000 | -0.580928000 | -2.991684000 |
| C | 3.587208000 | 1.425149000  | -2.352275000 |
| H | 3.278707000 | 1.624471000  | -3.381749000 |
| H | 2.959809000 | 2.022157000  | -1.686462000 |
| H | 4.620333000 | 1.764243000  | -2.237119000 |

**IPr-V-A** Etot = -1960.943099427773 a.u.

|   |              |              |              |
|---|--------------|--------------|--------------|
| C | 0.615898000  | -1.713322000 | -0.293292000 |
| C | -0.464981000 | 0.241167000  | -0.296357000 |
| C | 0.816964000  | 0.485084000  | 0.026256000  |
| H | 1.328560000  | 1.402265000  | 0.262346000  |
| N | -0.588437000 | -1.116311000 | -0.487374000 |
| N | 1.471506000  | -0.722232000 | 0.032855000  |
| C | 2.864592000  | -0.741594000 | 0.434898000  |
| C | 3.841595000  | -0.464954000 | -0.522566000 |
| C | 3.150803000  | -0.853605000 | 1.801154000  |
| C | 5.159045000  | -0.355138000 | -0.079579000 |
| C | 4.479670000  | -0.730468000 | 2.187177000  |
| C | 5.479339000  | -0.491019000 | 1.257652000  |
| H | 5.942246000  | -0.146281000 | -0.799210000 |
| H | 4.735881000  | -0.817322000 | 3.236817000  |
| C | -1.914048000 | -1.651658000 | -0.741469000 |
| C | -2.432067000 | -1.599455000 | -2.040369000 |
| C | -2.690195000 | -2.044928000 | 0.362969000  |
| C | -3.725301000 | -2.082674000 | -2.234532000 |
| C | -3.975374000 | -2.509069000 | 0.108089000  |
| C | -4.483267000 | -2.550240000 | -1.179367000 |
| H | -4.148999000 | -2.067747000 | -3.231720000 |
| H | -4.594207000 | -2.834499000 | 0.934960000  |
| C | -2.212783000 | -1.912036000 | 1.794363000  |
| H | -1.121136000 | -1.920569000 | 1.797012000  |
| C | -1.720105000 | -0.953960000 | -3.208183000 |
| H | -0.693441000 | -0.737365000 | -2.910405000 |
| C | 3.532430000  | -0.237330000 | -1.985480000 |
| H | 2.491379000  | -0.511489000 | -2.163150000 |
| C | 2.082301000  | -1.065766000 | 2.850003000  |
| H | 1.157869000  | -1.346161000 | 2.342289000  |
| H | -1.309769000 | 0.900498000  | -0.398230000 |
| C | 1.081018000  | -3.200055000 | -0.384503000 |
| O | 2.165618000  | -3.356635000 | 0.399101000  |
| C | 1.383395000  | -3.515496000 | -1.830844000 |
| C | -0.063484000 | -4.152582000 | 0.232401000  |
| H | 1.195896000  | -3.931987000 | 1.559528000  |

|   |              |              |              |
|---|--------------|--------------|--------------|
| C | 1.264557000  | -2.863908000 | -3.015119000 |
| O | 1.995559000  | -4.708845000 | -2.037598000 |
| O | 0.227070000  | -4.196050000 | 1.595484000  |
| H | -1.045023000 | -3.709347000 | 0.061221000  |
| C | -0.105057000 | -5.531799000 | -0.328999000 |
| C | 1.821649000  | -3.716711000 | -4.015084000 |
| H | 0.853899000  | -1.882442000 | -3.171418000 |
| C | 2.248426000  | -4.820259000 | -3.360967000 |
| C | 0.342623000  | -6.728980000 | 0.126255000  |
| O | -0.745268000 | -5.698815000 | -1.513907000 |
| H | 1.898248000  | -3.523936000 | -5.073885000 |
| H | 2.735492000  | -5.729641000 | -3.674832000 |
| C | -0.030736000 | -7.697214000 | -0.855684000 |
| H | 0.872698000  | -6.897796000 | 1.049870000  |
| C | -0.683959000 | -7.017469000 | -1.826485000 |
| H | 0.157275000  | -8.759820000 | -0.835872000 |
| H | -1.154752000 | -7.308911000 | -2.751580000 |
| H | 3.658908000  | -3.994160000 | 0.106464000  |
| O | 4.587992000  | -4.339380000 | 0.045919000  |
| C | 4.905982000  | -4.962248000 | 1.265017000  |
| H | 4.907015000  | -4.256449000 | 2.106809000  |
| H | 4.212405000  | -5.778155000 | 1.508725000  |
| H | 5.909616000  | -5.387709000 | 1.185272000  |
| H | -5.486525000 | -2.922551000 | -1.354371000 |
| H | 6.510164000  | -0.398388000 | 1.581485000  |
| C | 2.425867000  | -2.201000000 | 3.810270000  |
| H | 1.586097000  | -2.380131000 | 4.486397000  |
| H | 2.635818000  | -3.126284000 | 3.270547000  |
| H | 3.296661000  | -1.958484000 | 4.424364000  |
| C | 1.819703000  | 0.227987000  | 3.622494000  |
| H | 1.530602000  | 1.044377000  | 2.956588000  |
| H | 1.015264000  | 0.078626000  | 4.347524000  |
| H | 2.714507000  | 0.538833000  | 4.168996000  |
| C | -2.668679000 | -3.057945000 | 2.691603000  |
| H | -3.748153000 | -3.035009000 | 2.859197000  |
| H | -2.401424000 | -4.028797000 | 2.272331000  |
| H | -2.185972000 | -2.966975000 | 3.667321000  |
| C | -2.680244000 | -0.576218000 | 2.379194000  |
| H | -2.298902000 | -0.460591000 | 3.396997000  |
| H | -2.335900000 | 0.275235000  | 1.789502000  |
| H | -3.772523000 | -0.540333000 | 2.419014000  |
| C | -1.685705000 | -1.848510000 | -4.444382000 |
| H | -1.074821000 | -1.382966000 | -5.221705000 |
| H | -1.264938000 | -2.830295000 | -4.221491000 |
| H | -2.687598000 | -1.991505000 | -4.855801000 |
| C | -2.377961000 | 0.386842000  | -3.545042000 |

|   |              |              |              |
|---|--------------|--------------|--------------|
| H | -3.411278000 | 0.239115000  | -3.869576000 |
| H | -2.386295000 | 1.061487000  | -2.686210000 |
| H | -1.833966000 | 0.874729000  | -4.357715000 |
| C | 4.394183000  | -1.108159000 | -2.895864000 |
| H | 4.302756000  | -2.165394000 | -2.639497000 |
| H | 4.080783000  | -0.982947000 | -3.935236000 |
| H | 5.449027000  | -0.829656000 | -2.832280000 |
| C | 3.691235000  | 1.240120000  | -2.347150000 |
| H | 3.429050000  | 1.401865000  | -3.395941000 |
| H | 3.049332000  | 1.875933000  | -1.732879000 |
| H | 4.725470000  | 1.564809000  | -2.203384000 |

**VI...IPr-I(H)-A** Etot = -1960.954576544535 a.u.

|   |              |              |              |
|---|--------------|--------------|--------------|
| C | -1.883557000 | 0.584439000  | -0.314379000 |
| C | -2.711256000 | 1.748563000  | -2.080304000 |
| H | -3.470497000 | 2.233295000  | -2.671542000 |
| C | -1.385218000 | 1.600464000  | -2.283007000 |
| N | -2.988181000 | 1.124640000  | -0.880731000 |
| N | -0.905782000 | 0.892918000  | -1.198544000 |
| C | 0.469244000  | 0.530449000  | -1.037465000 |
| C | 1.343769000  | 1.455152000  | -0.453931000 |
| C | 0.892763000  | -0.724284000 | -1.490688000 |
| C | 2.679730000  | 1.085693000  | -0.323499000 |
| C | 2.238469000  | -1.046170000 | -1.334301000 |
| C | 3.124083000  | -0.152369000 | -0.756368000 |
| H | 3.383078000  | 1.780447000  | 0.121885000  |
| H | 2.597776000  | -2.010376000 | -1.676693000 |
| C | -4.296928000 | 1.053476000  | -0.305590000 |
| C | -5.131093000 | -0.011926000 | -0.663557000 |
| C | -4.697071000 | 2.056837000  | 0.584271000  |
| C | -6.402440000 | -0.054554000 | -0.097654000 |
| C | -5.977503000 | 1.967225000  | 1.123863000  |
| C | -6.823146000 | 0.923612000  | 0.787567000  |
| H | -7.072299000 | -0.867722000 | -0.354837000 |
| H | -6.316499000 | 2.728427000  | 1.817928000  |
| C | -3.799672000 | 3.213601000  | 0.966637000  |
| H | -2.847154000 | 3.090425000  | 0.447049000  |
| C | -4.701601000 | -1.092297000 | -1.631947000 |
| H | -3.666088000 | -0.898259000 | -1.919021000 |
| C | 0.891300000  | 2.826983000  | -0.002240000 |
| H | -0.198612000 | 2.861082000  | -0.064438000 |
| C | -0.043224000 | -1.706159000 | -2.161168000 |
| H | -1.056508000 | -1.304143000 | -2.099296000 |
| H | -0.748926000 | 1.929966000  | -3.087603000 |
| H | -1.978213000 | -0.357154000 | 1.191807000  |

|   |              |              |              |
|---|--------------|--------------|--------------|
| O | -2.149990000 | -0.916766000 | 2.025057000  |
| C | -0.936619000 | -1.358920000 | 2.546598000  |
| C | -0.278670000 | -0.316475000 | 3.460604000  |
| H | -0.222363000 | -1.578277000 | 1.740106000  |
| C | -1.130721000 | -2.617216000 | 3.323042000  |
| O | -0.936010000 | 0.578209000  | 3.965875000  |
| C | 1.146442000  | -0.445659000 | 3.690902000  |
| C | -1.413468000 | -2.880676000 | 4.624202000  |
| O | -1.074288000 | -3.777937000 | 2.620500000  |
| C | 2.106589000  | -1.285311000 | 3.194259000  |
| O | 1.715938000  | 0.426549000  | 4.566660000  |
| C | -1.543584000 | -4.297611000 | 4.730269000  |
| H | -1.517779000 | -2.152864000 | 5.414427000  |
| C | -1.329037000 | -4.786459000 | 3.486039000  |
| C | 3.326233000  | -0.905709000 | 3.800290000  |
| H | 1.956555000  | -2.078534000 | 2.478296000  |
| C | 3.022926000  | 0.136797000  | 4.621086000  |
| H | -1.765205000 | -4.872880000 | 5.615695000  |
| H | -1.319312000 | -5.781526000 | 3.070992000  |
| H | 4.300840000  | -1.342277000 | 3.650022000  |
| H | 3.618691000  | 0.748130000  | 5.280841000  |
| O | -0.327587000 | 3.063429000  | 5.169647000  |
| C | -0.077621000 | 2.941936000  | 6.553242000  |
| H | -0.443008000 | 2.171687000  | 4.801044000  |
| H | -0.906472000 | 2.454398000  | 7.080480000  |
| H | 0.840936000  | 2.378966000  | 6.757674000  |
| H | 0.040803000  | 3.947272000  | 6.961417000  |
| H | -7.817218000 | 0.872296000  | 1.218323000  |
| H | 4.168952000  | -0.421239000 | -0.645125000 |
| C | -4.743375000 | -2.475001000 | -0.984441000 |
| H | -5.762399000 | -2.749796000 | -0.699626000 |
| H | -4.378450000 | -3.228920000 | -1.686770000 |
| H | -4.118833000 | -2.512003000 | -0.088795000 |
| C | -5.546492000 | -1.059027000 | -2.904693000 |
| H | -5.490294000 | -0.083129000 | -3.392964000 |
| H | -5.193957000 | -1.815155000 | -3.610993000 |
| H | -6.597026000 | -1.268103000 | -2.685391000 |
| C | 0.303527000  | -1.860044000 | -3.641921000 |
| H | -0.405164000 | -2.535995000 | -4.127523000 |
| H | 0.268651000  | -0.898710000 | -4.160162000 |
| H | 1.306773000  | -2.276639000 | -3.767506000 |
| C | -0.048108000 | -3.062403000 | -1.460257000 |
| H | -0.316765000 | -2.964284000 | -0.405987000 |
| H | -0.774732000 | -3.725817000 | -1.936400000 |
| H | 0.930485000  | -3.546052000 | -1.517725000 |
| C | -4.397263000 | 4.547812000  | 0.522905000  |

|   |              |             |              |
|---|--------------|-------------|--------------|
| H | -4.580877000 | 4.562319000 | -0.554199000 |
| H | -5.345360000 | 4.744351000 | 1.030852000  |
| H | -3.712675000 | 5.365220000 | 0.763768000  |
| C | -3.505068000 | 3.217634000 | 2.465564000  |
| H | -2.815566000 | 4.029537000 | 2.711288000  |
| H | -4.418465000 | 3.367290000 | 3.047565000  |
| H | -3.050595000 | 2.276420000 | 2.782991000  |
| C | 1.443159000  | 3.908761000 | -0.930974000 |
| H | 2.536096000  | 3.928906000 | -0.897695000 |
| H | 1.139316000  | 3.738178000 | -1.966569000 |
| H | 1.077827000  | 4.892530000 | -0.624998000 |
| C | 1.272657000  | 3.112848000 | 1.447834000  |
| H | 0.866769000  | 2.356777000 | 2.123016000  |
| H | 2.357232000  | 3.139888000 | 1.580307000  |
| H | 0.877775000  | 4.085709000 | 1.751446000  |

**IPr-I(H)-B** Etot = -1274.183967992810 a.u.

|   |              |              |              |
|---|--------------|--------------|--------------|
| C | -0.241441000 | -0.669413000 | 0.250475000  |
| C | -0.714871000 | 1.453302000  | -0.418519000 |
| H | -1.386201000 | 2.264911000  | -0.660242000 |
| C | 0.649180000  | 1.395170000  | -0.441773000 |
| H | 1.891459000  | 2.444279000  | -0.916526000 |
| N | -1.226763000 | 0.220793000  | -0.006165000 |
| N | 0.870347000  | 0.068974000  | -0.021413000 |
| C | 2.178137000  | -0.479384000 | 0.112837000  |
| C | 2.771367000  | -1.114149000 | -0.986804000 |
| C | 2.847002000  | -0.364847000 | 1.339012000  |
| C | 4.049403000  | -1.645652000 | -0.831823000 |
| C | 4.123415000  | -0.911309000 | 1.448477000  |
| C | 4.722576000  | -1.549106000 | 0.374853000  |
| H | 4.524029000  | -2.144586000 | -1.670420000 |
| H | 4.656127000  | -0.835485000 | 2.390769000  |
| C | -2.614708000 | -0.067332000 | 0.119326000  |
| C | -3.312136000 | -0.558643000 | -0.992768000 |
| C | -3.253451000 | 0.166959000  | 1.344599000  |
| C | -4.671303000 | -0.825867000 | -0.849700000 |
| C | -4.613813000 | -0.115187000 | 1.440241000  |
| C | -5.319355000 | -0.608085000 | 0.354911000  |
| H | -5.230211000 | -1.212192000 | -1.695582000 |
| H | -5.128290000 | 0.053302000  | 2.380459000  |
| C | -2.508138000 | 0.700246000  | 2.548472000  |
| H | -1.475720000 | 0.881626000  | 2.243032000  |
| C | -2.631761000 | -0.810973000 | -2.320452000 |
| H | -1.587241000 | -0.509458000 | -2.219182000 |
| C | 2.064760000  | -1.237445000 | -2.319309000 |

|   |              |              |              |
|---|--------------|--------------|--------------|
| H | 1.100161000  | -0.734917000 | -2.226236000 |
| C | 2.224840000  | 0.330541000  | 2.530178000  |
| H | 1.239738000  | 0.687278000  | 2.224031000  |
| O | 2.665992000  | 3.082203000  | -1.217867000 |
| C | 2.086150000  | 4.255034000  | -1.713366000 |
| H | 2.874033000  | 4.953400000  | -2.013821000 |
| H | 1.453564000  | 4.074985000  | -2.596353000 |
| H | 1.462441000  | 4.767450000  | -0.964589000 |
| H | 5.717203000  | -1.969821000 | 0.478107000  |
| H | -6.378586000 | -0.822841000 | 0.448101000  |
| C | 2.027027000  | -0.631421000 | 3.699968000  |
| H | 2.984253000  | -1.016920000 | 4.062105000  |
| H | 1.535679000  | -0.120625000 | 4.532708000  |
| H | 1.407509000  | -1.483727000 | 3.410157000  |
| C | 3.045109000  | 1.546575000  | 2.956944000  |
| H | 3.160762000  | 2.253655000  | 2.131655000  |
| H | 2.551915000  | 2.065069000  | 3.783778000  |
| H | 4.043429000  | 1.253720000  | 3.294236000  |
| C | 2.843638000  | -0.541612000 | -3.433990000 |
| H | 2.288211000  | -0.595662000 | -4.374350000 |
| H | 3.013579000  | 0.511770000  | -3.198298000 |
| H | 3.817043000  | -1.013690000 | -3.594097000 |
| C | 1.794811000  | -2.698478000 | -2.674018000 |
| H | 2.728534000  | -3.255036000 | -2.795410000 |
| H | 1.205872000  | -3.191619000 | -1.896722000 |
| H | 1.241405000  | -2.764957000 | -3.614867000 |
| C | -2.480503000 | -0.324047000 | 3.681743000  |
| H | -1.897168000 | 0.058140000  | 4.523942000  |
| H | -3.489722000 | -0.539971000 | 4.043783000  |
| H | -2.030073000 | -1.264049000 | 3.353844000  |
| C | -3.089845000 | 2.028183000  | 3.028950000  |
| H | -3.083682000 | 2.775342000  | 2.231489000  |
| H | -4.120868000 | 1.909955000  | 3.373755000  |
| H | -2.501807000 | 2.417152000  | 3.864544000  |
| C | -2.650972000 | -2.295756000 | -2.679772000 |
| H | -2.174283000 | -2.897019000 | -1.901732000 |
| H | -3.675066000 | -2.657549000 | -2.807711000 |
| H | -2.115715000 | -2.465770000 | -3.617929000 |
| C | -3.250568000 | 0.027085000  | -3.437423000 |
| H | -2.709612000 | -0.133441000 | -4.373880000 |
| H | -4.296281000 | -0.244831000 | -3.605733000 |
| H | -3.212513000 | 1.093222000  | -3.200666000 |

**IPr-I(H2)-B** Etot = -1389.843324681597a.u.

|   |                 |                 |                 |
|---|-----------------|-----------------|-----------------|
| C | -0.234288000000 | -0.683977000000 | 0.211102000000  |
| C | -0.704404000000 | 1.430067000000  | -0.453224000000 |
| H | -1.374299000000 | 2.242866000000  | -0.693805000000 |
| C | 0.660336000000  | 1.368989000000  | -0.478326000000 |
| H | 1.897565000000  | 2.469069000000  | -0.907810000000 |
| N | -1.220562000000 | 0.200747000000  | -0.042384000000 |
| N | 0.880483000000  | 0.043269000000  | -0.060319000000 |
| C | 2.187172000000  | -0.513358000000 | 0.065652000000  |
| C | 2.783582000000  | -1.115331000000 | -1.050763000000 |
| C | 2.849894000000  | -0.434318000000 | 1.297736000000  |
| C | 4.062120000000  | -1.648367000000 | -0.906641000000 |
| C | 4.127109000000  | -0.981404000000 | 1.394808000000  |
| C | 4.730846000000  | -1.585530000000 | 0.304656000000  |
| H | 4.541338000000  | -2.120735000000 | -1.757823000000 |
| H | 4.657460000000  | -0.931133000000 | 2.339997000000  |
| C | -2.609997000000 | -0.088947000000 | 0.079929000000  |
| C | -3.306167000000 | -0.560611000000 | -1.041185000000 |
| C | -3.247560000000 | 0.126602000000  | 1.308832000000  |
| C | -4.666556000000 | -0.824291000000 | -0.904115000000 |
| C | -4.609305000000 | -0.150973000000 | 1.397250000000  |
| C | -5.315114000000 | -0.622815000000 | 0.302987000000  |
| H | -5.226214000000 | -1.194049000000 | -1.756801000000 |
| H | -5.124486000000 | 0.005535000000  | 2.339017000000  |
| C | -2.505871000000 | 0.646779000000  | 2.520517000000  |
| H | -1.457006000000 | 0.765454000000  | 2.241175000000  |
| C | -2.626772000000 | -0.788110000000 | -2.374015000000 |
| H | -1.574549000000 | -0.519275000000 | -2.260912000000 |
| C | 2.086056000000  | -1.194687000000 | -2.391613000000 |
| H | 1.104174000000  | -0.730740000000 | -2.280288000000 |
| C | 2.227393000000  | 0.232277000000  | 2.505259000000  |
| H | 1.225719000000  | 0.560386000000  | 2.221320000000  |
| O | 2.647961000000  | 3.142323000000  | -1.171437000000 |
| C | 2.032191000000  | 4.299066000000  | -1.663088000000 |
| H | 2.799030000000  | 5.029074000000  | -1.940941000000 |
| H | 1.422898000000  | 4.105915000000  | -2.559206000000 |
| H | 1.377324000000  | 4.777825000000  | -0.919087000000 |
| H | 5.726242000000  | -2.006542000000 | 0.398480000000  |
| H | -6.375432000000 | -0.834070000000 | 0.391258000000  |
| C | 2.082374000000  | -0.739763000000 | 3.674338000000  |
| H | 3.057913000000  | -1.088988000000 | 4.023932000000  |
| H | 1.583385000000  | -0.248861000000 | 4.514363000000  |
| H | 1.491788000000  | -1.614378000000 | 3.391034000000  |
| C | 3.019655000000  | 1.470529000000  | 2.922268000000  |
| H | 3.096186000000  | 2.186278000000  | 2.100001000000  |
| H | 2.530200000000  | 1.968481000000  | 3.763752000000  |
| H | 4.033349000000  | 1.203684000000  | 3.234360000000  |

|   |                 |                 |                 |
|---|-----------------|-----------------|-----------------|
| C | 2.848105000000  | -0.414191000000 | -3.461566000000 |
| H | 2.301632000000  | -0.438002000000 | -4.408357000000 |
| H | 2.981044000000  | 0.630264000000  | -3.170029000000 |
| H | 3.837847000000  | -0.845629000000 | -3.635938000000 |
| C | 1.869958000000  | -2.641825000000 | -2.829718000000 |
| H | 2.822989000000  | -3.156111000000 | -2.982383000000 |
| H | 1.299387000000  | -3.202321000000 | -2.085381000000 |
| H | 1.319795000000  | -2.672436000000 | -3.774258000000 |
| C | -2.564226000000 | -0.343944000000 | 3.681690000000  |
| H | -1.970994000000 | 0.025340000000  | 4.522597000000  |
| H | -3.590236000000 | -0.483711000000 | 4.033151000000  |
| H | -2.170591000000 | -1.320279000000 | 3.389341000000  |
| C | -3.030891000000 | 2.016698000000  | 2.946967000000  |
| H | -2.958273000000 | 2.740440000000  | 2.131478000000  |
| H | -4.078254000000 | 1.959195000000  | 3.256399000000  |
| H | -2.452134000000 | 2.397018000000  | 3.792956000000  |
| C | -2.685983000000 | -2.257337000000 | -2.787742000000 |
| H | -2.225900000000 | -2.901169000000 | -2.034067000000 |
| H | -3.718792000000 | -2.587333000000 | -2.929912000000 |
| H | -2.154771000000 | -2.405491000000 | -3.731861000000 |
| C | -3.219194000000 | 0.107081000000  | -3.460943000000 |
| H | -2.681594000000 | -0.035307000000 | -4.402197000000 |
| H | -4.272076000000 | -0.129108000000 | -3.638255000000 |
| H | -3.151229000000 | 1.162449000000  | -3.185840000000 |
| H | -0.440972000000 | -2.292764000000 | 0.986841000000  |
| O | -0.588509000000 | -3.172767000000 | 1.470705000000  |
| C | -0.228414000000 | -4.218151000000 | 0.607093000000  |
| H | 0.853976000000  | -4.252497000000 | 0.416695000000  |
| H | -0.514628000000 | -5.170310000000 | 1.062698000000  |
| H | -0.734932000000 | -4.148814000000 | -0.365715000000 |

**IPr-I-B** Etot = -1158.516467465710 a.u.

|   |              |              |              |
|---|--------------|--------------|--------------|
| C | -0.330215000 | -0.709885000 | 0.253419000  |
| C | -0.588938000 | 1.470764000  | -0.402664000 |
| H | -1.189278000 | 2.334614000  | -0.651212000 |
| C | 0.767004000  | 1.310488000  | -0.385881000 |
| N | -1.224281000 | 0.267283000  | -0.021967000 |
| N | 0.844514000  | -0.045907000 | 0.024525000  |
| C | 2.094478000  | -0.696590000 | 0.195414000  |
| C | 2.656475000  | -1.404898000 | -0.875166000 |
| C | 2.756037000  | -0.605611000 | 1.426855000  |
| C | 3.893192000  | -2.015830000 | -0.693149000 |
| C | 3.991719000  | -1.230158000 | 1.566764000  |
| C | 4.560314000  | -1.930470000 | 0.517010000  |
| H | 4.342566000  | -2.569675000 | -1.510254000 |

|   |              |              |              |
|---|--------------|--------------|--------------|
| H | 4.517593000  | -1.170409000 | 2.513620000  |
| C | -2.626120000 | 0.100189000  | 0.059380000  |
| C | -3.336447000 | -0.311343000 | -1.077028000 |
| C | -3.284057000 | 0.384048000  | 1.264282000  |
| C | -4.717935000 | -0.446271000 | -0.982282000 |
| C | -4.666456000 | 0.235382000  | 1.315429000  |
| C | -5.381073000 | -0.176344000 | 0.203037000  |
| H | -5.285650000 | -0.768016000 | -1.848628000 |
| H | -5.194072000 | 0.445253000  | 2.239509000  |
| C | -2.491703000 | 0.786381000  | 2.487747000  |
| H | -1.556175000 | 1.222574000  | 2.127118000  |
| C | -2.599569000 | -0.654887000 | -2.352012000 |
| H | -1.653608000 | -0.107186000 | -2.326586000 |
| C | 1.948876000  | -1.455997000 | -2.210315000 |
| H | 0.882281000  | -1.348987000 | -1.998100000 |
| C | 2.155914000  | 0.194011000  | 2.560887000  |
| H | 1.078074000  | 0.221437000  | 2.383773000  |
| H | 5.523635000  | -2.414726000 | 0.643266000  |
| H | -6.459490000 | -0.285025000 | 0.259458000  |
| C | 2.383808000  | -0.432622000 | 3.931309000  |
| H | 3.438448000  | -0.412742000 | 4.223422000  |
| H | 1.829615000  | 0.124876000  | 4.692200000  |
| H | 2.044619000  | -1.471191000 | 3.956828000  |
| C | 2.664985000  | 1.634919000  | 2.516717000  |
| H | 2.420027000  | 2.084080000  | 1.550498000  |
| H | 2.200136000  | 2.231628000  | 3.308989000  |
| H | 3.750836000  | 1.665251000  | 2.660491000  |
| C | 2.369677000  | -0.266156000 | -3.073691000 |
| H | 1.822079000  | -0.266503000 | -4.022369000 |
| H | 2.160289000  | 0.669605000  | -2.548352000 |
| H | 3.440820000  | -0.314352000 | -3.299368000 |
| C | 2.141465000  | -2.772569000 | -2.952593000 |
| H | 3.174500000  | -2.909604000 | -3.287597000 |
| H | 1.871228000  | -3.627448000 | -2.327666000 |
| H | 1.509856000  | -2.791594000 | -3.845590000 |
| C | -2.133433000 | -0.451504000 | 3.310685000  |
| H | -1.518279000 | -0.175679000 | 4.173290000  |
| H | -3.038517000 | -0.944405000 | 3.681837000  |
| H | -1.572991000 | -1.160623000 | 2.697167000  |
| C | -3.192047000 | 1.833043000  | 3.346149000  |
| H | -3.477434000 | 2.708432000  | 2.757411000  |
| H | -4.094074000 | 1.437620000  | 3.823302000  |
| H | -2.524152000 | 2.165578000  | 4.145581000  |
| C | -2.265951000 | -2.146880000 | -2.377875000 |
| H | -1.675514000 | -2.415307000 | -1.498814000 |
| H | -3.181744000 | -2.747840000 | -2.383678000 |

|   |              |              |              |
|---|--------------|--------------|--------------|
| H | -1.689488000 | -2.397203000 | -3.274278000 |
| C | -3.344341000 | -0.236859000 | -3.614279000 |
| H | -2.713438000 | -0.406114000 | -4.491237000 |
| H | -4.262283000 | -0.814385000 | -3.761046000 |
| H | -3.611915000 | 0.822437000  | -3.589196000 |

**IPr-TS1-B**  $i109\text{ cm}^{-1}$  Etot = -1617.176877669016 a.u.

|   |              |              |              |
|---|--------------|--------------|--------------|
| C | -1.748522000 | -1.922574000 | -0.166544000 |
| C | -2.256709000 | -0.083912000 | -1.433986000 |
| H | -2.939694000 | 0.639309000  | -1.856933000 |
| C | -0.899663000 | -0.167467000 | -1.516519000 |
| H | 2.531613000  | 3.090452000  | -0.746615000 |
| N | -2.745046000 | -1.130673000 | -0.626508000 |
| N | -0.659700000 | -1.313147000 | -0.721985000 |
| C | 0.650340000  | -1.819927000 | -0.526551000 |
| C | 1.555896000  | -1.105988000 | 0.263340000  |
| C | 1.030517000  | -3.016762000 | -1.136233000 |
| C | 2.844153000  | -1.604138000 | 0.420511000  |
| C | 2.326885000  | -3.484816000 | -0.944602000 |
| C | 3.251392000  | -2.790997000 | -0.175886000 |
| H | 3.548009000  | -1.042826000 | 1.029565000  |
| H | 2.621480000  | -4.417550000 | -1.419723000 |
| C | -4.108296000 | -1.335615000 | -0.314637000 |
| C | -4.955207000 | -1.914056000 | -1.262307000 |
| C | -4.601876000 | -0.928495000 | 0.928231000  |
| C | -6.301583000 | -2.072470000 | -0.949487000 |
| C | -5.952497000 | -1.108996000 | 1.201858000  |
| C | -6.819941000 | -1.678542000 | 0.276996000  |
| H | -6.960851000 | -2.524412000 | -1.686413000 |
| H | -6.337484000 | -0.790303000 | 2.167378000  |
| C | -3.681643000 | -0.319572000 | 1.938579000  |
| H | -2.916025000 | -1.041047000 | 2.234766000  |
| H | -3.148344000 | 0.536077000  | 1.516418000  |
| H | -4.233638000 | 0.006614000  | 2.822398000  |
| C | -4.409796000 | -2.381849000 | -2.575845000 |
| H | -3.978021000 | -1.556145000 | -3.146440000 |
| H | -3.599946000 | -3.098856000 | -2.416849000 |
| H | -5.190357000 | -2.855013000 | -3.174960000 |
| C | 1.137907000  | 0.158653000  | 0.944185000  |
| H | 0.760235000  | 0.881537000  | 0.217743000  |
| H | 0.317837000  | -0.037008000 | 1.641852000  |
| H | 1.973278000  | 0.599921000  | 1.490339000  |
| C | 0.063801000  | -3.777923000 | -1.988990000 |
| H | -0.782614000 | -4.126220000 | -1.392124000 |
| H | -0.351257000 | -3.132962000 | -2.768560000 |

|   |              |              |              |
|---|--------------|--------------|--------------|
| H | 0.553133000  | -4.633274000 | -2.460616000 |
| C | 4.658416000  | -3.289377000 | -0.018346000 |
| H | 5.040397000  | -3.094634000 | 0.987103000  |
| H | 4.721691000  | -4.364519000 | -0.202220000 |
| H | 5.337107000  | -2.795438000 | -0.722214000 |
| C | -8.268201000 | -1.890354000 | 0.608962000  |
| H | -8.413679000 | -2.811218000 | 1.184044000  |
| H | -8.664163000 | -1.068172000 | 1.210358000  |
| H | -8.875351000 | -1.971084000 | -0.295428000 |
| O | 3.260915000  | 3.272378000  | -0.126082000 |
| C | 2.717609000  | 3.942167000  | 0.974966000  |
| H | 3.534296000  | 4.180373000  | 1.662815000  |
| H | 2.226194000  | 4.884605000  | 0.694036000  |
| H | 1.984510000  | 3.331825000  | 1.520714000  |
| C | 0.549788000  | 2.235015000  | -2.536654000 |
| H | 0.915317000  | 1.205714000  | -2.605467000 |
| O | 1.037943000  | 3.075337000  | -1.797418000 |
| C | -0.552413000 | 2.540145000  | -3.438641000 |
| C | -1.268290000 | 1.752703000  | -4.291804000 |
| O | -0.962615000 | 3.831825000  | -3.551344000 |
| C | -2.169731000 | 2.611848000  | -4.968702000 |
| H | -1.180933000 | 0.679591000  | -4.348148000 |
| C | -1.936003000 | 3.856521000  | -4.473800000 |
| H | -2.906487000 | 2.345491000  | -5.710061000 |
| H | -2.372365000 | 4.821374000  | -4.676650000 |

**IPr-II-B** Etot = -1617.339058061638 a.u.

|   |              |              |              |
|---|--------------|--------------|--------------|
| C | -0.708414000 | -0.668209000 | 0.685626000  |
| C | 0.473625000  | -1.070036000 | 0.165520000  |
| N | -1.689332000 | -1.019348000 | -0.223236000 |
| C | -1.187674000 | -1.643368000 | -1.316664000 |
| N | 0.148052000  | -1.657927000 | -1.054864000 |
| H | -0.931033000 | -0.171409000 | 1.615936000  |
| O | 1.347809000  | 2.397728000  | -0.048583000 |
| C | 1.887998000  | -0.897574000 | 0.682736000  |
| O | 2.531999000  | 0.175555000  | 0.143491000  |
| H | 1.795725000  | 1.470368000  | 0.049794000  |
| C | 2.352106000  | 3.364848000  | -0.165202000 |
| H | 3.027641000  | 3.377859000  | 0.703534000  |
| H | 2.973983000  | 3.223083000  | -1.062150000 |
| H | 1.894368000  | 4.356762000  | -0.238623000 |
| H | 2.405445000  | -1.851030000 | 0.437236000  |
| C | 1.852003000  | -0.848357000 | 2.190734000  |
| C | 2.163262000  | 0.126886000  | 3.081008000  |
| O | 1.468445000  | -1.969221000 | 2.860062000  |

|   |              |              |              |
|---|--------------|--------------|--------------|
| C | 1.951308000  | -0.425806000 | 4.383737000  |
| H | 2.505305000  | 1.118747000  | 2.832872000  |
| C | 1.531503000  | -1.696732000 | 4.188471000  |
| H | 2.096586000  | 0.059741000  | 5.336812000  |
| H | 1.255918000  | -2.500118000 | 4.852916000  |
| C | -3.078074000 | -0.758452000 | -0.019588000 |
| C | -3.612772000 | 0.452807000  | -0.475447000 |
| C | -3.856300000 | -1.714144000 | 0.644980000  |
| C | -4.966771000 | 0.690146000  | -0.253436000 |
| C | -5.205465000 | -1.431136000 | 0.841809000  |
| C | -5.757758000 | -0.241091000 | 0.398427000  |
| H | -5.407223000 | 1.620164000  | -0.596353000 |
| H | -5.832136000 | -2.154828000 | 1.351873000  |
| C | 1.085052000  | -2.270955000 | -1.944850000 |
| C | 1.542450000  | -1.552604000 | -3.057818000 |
| C | 1.489387000  | -3.589250000 | -1.694900000 |
| C | 2.421361000  | -2.192213000 | -3.928293000 |
| C | 2.374463000  | -4.182274000 | -2.591645000 |
| C | 2.837104000  | -3.492913000 | -3.699451000 |
| H | 2.783817000  | -1.662234000 | -4.802056000 |
| H | 2.697278000  | -5.203978000 | -2.424683000 |
| C | 1.087229000  | -0.140621000 | -3.357166000 |
| H | 0.569003000  | 0.236557000  | -2.473151000 |
| C | 0.957739000  | -4.392012000 | -0.526542000 |
| H | 0.409155000  | -3.712412000 | 0.128884000  |
| C | -2.772887000 | 1.492939000  | -1.183870000 |
| H | -1.762741000 | 1.092928000  | -1.290032000 |
| C | -3.281086000 | -3.020394000 | 1.147502000  |
| H | -2.222768000 | -3.045747000 | 0.880436000  |
| H | 3.522679000  | -3.972671000 | -4.389734000 |
| H | -6.810618000 | -0.038068000 | 0.562278000  |
| C | 2.255848000  | 0.799539000  | -3.642807000 |
| H | 2.978546000  | 0.795402000  | -2.824120000 |
| H | 2.779564000  | 0.524300000  | -4.561892000 |
| H | 1.887907000  | 1.821358000  | -3.767310000 |
| C | 0.095030000  | -0.128833000 | -4.520107000 |
| H | 0.568349000  | -0.493650000 | -5.436440000 |
| H | -0.770352000 | -0.760285000 | -4.308464000 |
| H | -0.259671000 | 0.888713000  | -4.706098000 |
| C | -3.301699000 | 1.778430000  | -2.587925000 |
| H | -3.342965000 | 0.866422000  | -3.188302000 |
| H | -4.306578000 | 2.208010000  | -2.554536000 |
| H | -2.649715000 | 2.493036000  | -3.097119000 |
| C | -2.676753000 | 2.778753000  | -0.364158000 |
| H | -3.660086000 | 3.239828000  | -0.236210000 |
| H | -2.260838000 | 2.586394000  | 0.627776000  |

|   |              |              |              |
|---|--------------|--------------|--------------|
| H | -2.029928000 | 3.500787000  | -0.869426000 |
| C | -3.951467000 | -4.218884000 | 0.478621000  |
| H | -3.858551000 | -4.168135000 | -0.608895000 |
| H | -3.486673000 | -5.148471000 | 0.817688000  |
| H | -5.015379000 | -4.267144000 | 0.726220000  |
| C | -3.376239000 | -3.120462000 | 2.669024000  |
| H | -4.418120000 | -3.120309000 | 3.000992000  |
| H | -2.914372000 | -4.048791000 | 3.015404000  |
| H | -2.866349000 | -2.284453000 | 3.153994000  |
| C | -0.026452000 | -5.456240000 | -1.012803000 |
| H | -0.444967000 | -6.003386000 | -0.163675000 |
| H | -0.851405000 | -5.007278000 | -1.571022000 |
| H | 0.472966000  | -6.177188000 | -1.666379000 |
| C | 2.073123000  | -5.025927000 | 0.300883000  |
| H | 2.782216000  | -4.274306000 | 0.655829000  |
| H | 1.649250000  | -5.531541000 | 1.172357000  |
| H | 2.628084000  | -5.770838000 | -0.275141000 |

**IPr -TS2-B**  $i1101\text{ cm}^{-1}$  Etot = -1617.290398446087 a.u.

|   |              |              |              |
|---|--------------|--------------|--------------|
| C | -0.408939000 | -0.837790000 | 0.436892000  |
| C | 0.734513000  | -1.224302000 | -0.177105000 |
| N | -1.453733000 | -1.149182000 | -0.406911000 |
| C | -1.031241000 | -1.691322000 | -1.571257000 |
| N | 0.326056000  | -1.729705000 | -1.412649000 |
| H | -0.569147000 | -0.421329000 | 1.415466000  |
| O | 3.803824000  | -3.373383000 | 0.913838000  |
| C | 2.111557000  | -1.277457000 | 0.435725000  |
| O | 3.172319000  | -1.166534000 | -0.488270000 |
| H | 3.721977000  | -1.958212000 | -0.200654000 |
| C | 4.236392000  | -3.559567000 | 2.191431000  |
| H | 5.286535000  | -3.233998000 | 2.382237000  |
| H | 3.619966000  | -3.018333000 | 2.957171000  |
| H | 4.223506000  | -4.624167000 | 2.505446000  |
| H | 2.282162000  | -2.262317000 | 0.931636000  |
| C | 2.299170000  | -0.248854000 | 1.522106000  |
| C | 3.268029000  | 0.680363000  | 1.706622000  |
| O | 1.481099000  | -0.277237000 | 2.603500000  |
| C | 3.025651000  | 1.272219000  | 2.985972000  |
| H | 4.062952000  | 0.908465000  | 1.017311000  |
| C | 1.934376000  | 0.653067000  | 3.483846000  |
| H | 3.597768000  | 2.049924000  | 3.467950000  |
| H | 1.379120000  | 0.750412000  | 4.401454000  |
| C | -2.817528000 | -0.990266000 | -0.012735000 |
| C | -3.568564000 | 0.086727000  | -0.494655000 |
| C | -3.343092000 | -1.917976000 | 0.897985000  |

|   |              |              |              |
|---|--------------|--------------|--------------|
| C | -4.876940000 | 0.222128000  | -0.033772000 |
| C | -4.650598000 | -1.732682000 | 1.337894000  |
| C | -5.413283000 | -0.671509000 | 0.876860000  |
| H | -5.480750000 | 1.049113000  | -0.392557000 |
| H | -5.078744000 | -2.433145000 | 2.046718000  |
| C | 1.129102000  | -2.034364000 | -2.566037000 |
| C | 1.350062000  | -1.003817000 | -3.492973000 |
| C | 1.574751000  | -3.335183000 | -2.797951000 |
| C | 2.031290000  | -1.307181000 | -4.666807000 |
| C | 2.241505000  | -3.592004000 | -3.995791000 |
| C | 2.470475000  | -2.594528000 | -4.924957000 |
| H | 2.212056000  | -0.522035000 | -5.393552000 |
| H | 2.595134000  | -4.597916000 | -4.193425000 |
| C | 0.858898000  | 0.414090000  | -3.281861000 |
| H | 0.350134000  | 0.456753000  | -2.317787000 |
| C | 1.404300000  | -4.468757000 | -1.814210000 |
| H | 0.913442000  | -4.071908000 | -0.922160000 |
| C | -3.019660000 | 1.094413000  | -1.478175000 |
| H | -2.008600000 | 0.784847000  | -1.738719000 |
| C | -2.538266000 | -3.099326000 | 1.391598000  |
| H | -1.567593000 | -3.079800000 | 0.894039000  |
| H | 2.994758000  | -2.818918000 | -5.847286000 |
| H | -6.431461000 | -0.541614000 | 1.228498000  |
| C | 0.499750000  | -5.571443000 | -2.360525000 |
| H | 0.886985000  | -5.974267000 | -3.298880000 |
| H | 0.446126000  | -6.392478000 | -1.639728000 |
| H | -0.515858000 | -5.209640000 | -2.535578000 |
| C | 2.787108000  | -4.992744000 | -1.400684000 |
| H | 3.209267000  | -4.388925000 | -0.566656000 |
| H | 2.715233000  | -6.019516000 | -1.020209000 |
| H | 3.481570000  | -5.004800000 | -2.242888000 |
| C | -3.207844000 | -4.420585000 | 1.021087000  |
| H | -3.449025000 | -4.455593000 | -0.041453000 |
| H | -2.542313000 | -5.255853000 | 1.244862000  |
| H | -4.129502000 | -4.569614000 | 1.587464000  |
| C | -2.269563000 | -3.017489000 | 2.897898000  |
| H | -3.129726000 | -3.370992000 | 3.471957000  |
| H | -1.402910000 | -3.628963000 | 3.161843000  |
| H | -2.057944000 | -1.992541000 | 3.211193000  |
| C | -3.849354000 | 1.125771000  | -2.769838000 |
| H | -3.215137000 | 1.381160000  | -3.621554000 |
| H | -4.315877000 | 0.159746000  | -2.976887000 |
| H | -4.645374000 | 1.873580000  | -2.709110000 |
| C | -2.924923000 | 2.489281000  | -0.859086000 |
| H | -3.841018000 | 2.749588000  | -0.323144000 |
| H | -2.092312000 | 2.556337000  | -0.156253000 |

|   |              |             |              |
|---|--------------|-------------|--------------|
| H | -2.770722000 | 3.238138000 | -1.640097000 |
| C | 2.020204000  | 1.425597000 | -3.240909000 |
| H | 2.288227000  | 1.681711000 | -2.211064000 |
| H | 2.915366000  | 1.030429000 | -3.728202000 |
| H | 1.748201000  | 2.354906000 | -3.754088000 |
| C | -0.160349000 | 0.797332000 | -4.356895000 |
| H | 0.328689000  | 0.961311000 | -5.320348000 |
| H | -0.915025000 | 0.019579000 | -4.486643000 |
| H | -0.670524000 | 1.723896000 | -4.080995000 |

**IPr-III-B** Etot = -1617.303689204556 a.u.

|   |              |              |              |
|---|--------------|--------------|--------------|
| C | -0.363090000 | -0.793136000 | 0.498634000  |
| C | 0.810416000  | -1.030322000 | -0.188128000 |
| N | -1.408550000 | -1.125170000 | -0.356677000 |
| C | -0.995391000 | -1.546896000 | -1.560851000 |
| N | 0.370923000  | -1.487088000 | -1.445915000 |
| H | -0.531394000 | -0.458594000 | 1.505112000  |
| O | 2.084600000  | -3.479659000 | 1.842537000  |
| C | 2.170078000  | -0.936074000 | 0.240259000  |
| O | 3.197918000  | -1.099218000 | -0.705827000 |
| H | 3.497948000  | -2.012399000 | -0.690156000 |
| C | 1.930113000  | -3.188999000 | 3.213811000  |
| H | 2.055210000  | -4.119672000 | 3.771638000  |
| H | 2.679740000  | -2.472852000 | 3.570839000  |
| H | 0.935507000  | -2.785259000 | 3.441243000  |
| H | 2.082168000  | -2.631438000 | 1.340165000  |
| C | 2.583102000  | -0.213734000 | 1.384648000  |
| C | 3.837979000  | 0.184535000  | 1.825549000  |
| O | 1.650075000  | 0.184588000  | 2.303994000  |
| C | 3.637444000  | 0.840471000  | 3.074007000  |
| H | 4.771487000  | 0.016766000  | 1.313890000  |
| C | 2.309481000  | 0.818728000  | 3.332356000  |
| H | 4.394835000  | 1.281354000  | 3.706457000  |
| H | 1.691070000  | 1.186345000  | 4.134216000  |
| C | -2.775692000 | -1.032523000 | 0.032306000  |
| C | -3.483142000 | 0.146084000  | -0.235365000 |
| C | -3.367027000 | -2.119603000 | 0.688580000  |
| C | -4.818710000 | 0.208912000  | 0.155358000  |
| C | -4.704068000 | -2.009257000 | 1.061933000  |
| C | -5.426282000 | -0.857320000 | 0.797079000  |
| H | -5.390650000 | 1.108553000  | -0.045828000 |
| H | -5.186888000 | -2.839769000 | 1.565983000  |
| C | 1.177669000  | -1.787378000 | -2.588087000 |
| C | 1.567637000  | -3.111001000 | -2.825859000 |
| C | 1.498978000  | -0.755609000 | -3.479198000 |

|   |              |              |              |
|---|--------------|--------------|--------------|
| C | 2.296919000  | -3.383622000 | -3.980923000 |
| C | 2.232397000  | -1.074405000 | -4.618362000 |
| C | 2.630710000  | -2.376739000 | -4.870975000 |
| H | 2.604312000  | -4.402897000 | -4.188753000 |
| H | 2.492799000  | -0.289768000 | -5.321068000 |
| C | 1.197656000  | -4.240145000 | -1.888896000 |
| H | 0.779465000  | -3.795162000 | -0.983542000 |
| C | 1.072811000  | 0.676875000  | -3.242770000 |
| H | 0.534982000  | 0.711880000  | -2.293324000 |
| C | -2.845160000 | 1.329990000  | -0.927872000 |
| H | -1.801949000 | 1.074905000  | -1.124836000 |
| C | -2.603977000 | -3.391713000 | 0.986619000  |
| H | -1.581720000 | -3.257131000 | 0.627518000  |
| H | 3.199394000  | -2.608094000 | -5.765388000 |
| H | -6.467592000 | -0.789888000 | 1.093600000  |
| C | 0.119303000  | -5.127859000 | -2.510276000 |
| H | -0.769186000 | -4.547388000 | -2.768952000 |
| H | 0.489254000  | -5.607457000 | -3.421281000 |
| H | -0.176737000 | -5.915007000 | -1.811214000 |
| C | 2.407207000  | -5.076332000 | -1.478104000 |
| H | 2.847677000  | -5.594549000 | -2.333823000 |
| H | 3.184069000  | -4.460223000 | -1.018901000 |
| H | 2.106436000  | -5.835528000 | -0.751402000 |
| C | 0.116048000  | 1.156152000  | -4.333203000 |
| H | -0.764243000 | 0.512143000  | -4.398850000 |
| H | -0.221204000 | 2.174704000  | -4.122153000 |
| H | 0.605221000  | 1.161410000  | -5.311353000 |
| C | 2.274823000  | 1.612686000  | -3.128007000 |
| H | 1.941001000  | 2.628664000  | -2.900167000 |
| H | 2.953685000  | 1.289204000  | -2.336044000 |
| H | 2.838999000  | 1.650005000  | -4.064138000 |
| C | -2.534249000 | -3.663988000 | 2.488018000  |
| H | -1.936232000 | -4.558445000 | 2.681991000  |
| H | -2.077219000 | -2.826838000 | 3.021406000  |
| H | -3.530048000 | -3.830207000 | 2.908260000  |
| C | -3.202141000 | -4.585023000 | 0.243775000  |
| H | -3.221206000 | -4.410109000 | -0.834645000 |
| H | -2.609473000 | -5.484106000 | 0.433071000  |
| H | -4.225836000 | -4.783542000 | 0.573253000  |
| C | -2.859670000 | 2.572334000  | -0.039086000 |
| H | -3.881942000 | 2.894213000  | 0.178003000  |
| H | -2.354426000 | 2.384875000  | 0.911535000  |
| H | -2.348464000 | 3.399301000  | -0.539182000 |
| C | -3.513054000 | 1.614959000  | -2.271826000 |
| H | -3.473853000 | 0.740687000  | -2.926061000 |
| H | -4.562373000 | 1.893662000  | -2.140638000 |

H -3.007804000 2.442188000 -2.777582000

**IPr-IV-B** Etot = -1960.458937824896 a.u.

|   |              |              |              |
|---|--------------|--------------|--------------|
| C | 0.524638000  | -1.462995000 | -0.061865000 |
| C | -0.554350000 | 0.564064000  | 0.010702000  |
| C | 0.773202000  | 0.782553000  | 0.168255000  |
| H | 1.323099000  | 1.700352000  | 0.295098000  |
| N | -0.674722000 | -0.821577000 | -0.128232000 |
| N | 1.398844000  | -0.445093000 | 0.114939000  |
| C | 2.815723000  | -0.616981000 | 0.190264000  |
| C | 3.565127000  | -0.530436000 | -0.990165000 |
| C | 3.410827000  | -0.859456000 | 1.434122000  |
| C | 4.944128000  | -0.699650000 | -0.899445000 |
| C | 4.793035000  | -1.026172000 | 1.471600000  |
| C | 5.554818000  | -0.947077000 | 0.318283000  |
| H | 5.548046000  | -0.638012000 | -1.798272000 |
| H | 5.279156000  | -1.221753000 | 2.421230000  |
| C | -1.871555000 | -1.598500000 | -0.292362000 |
| C | -2.509328000 | -2.106510000 | 0.846717000  |
| C | -2.315996000 | -1.897716000 | -1.584209000 |
| C | -3.622683000 | -2.920129000 | 0.662744000  |
| C | -3.437449000 | -2.714381000 | -1.716631000 |
| C | -4.088468000 | -3.221719000 | -0.606572000 |
| H | -4.131375000 | -3.329238000 | 1.528627000  |
| H | -3.799019000 | -2.962983000 | -2.708434000 |
| C | -1.609884000 | -1.403102000 | -2.827522000 |
| H | -0.846746000 | -0.686015000 | -2.519889000 |
| C | -2.011607000 | -1.828299000 | 2.248376000  |
| H | -1.264977000 | -1.033698000 | 2.188660000  |
| C | 2.931788000  | -0.262489000 | -2.338066000 |
| H | 1.851327000  | -0.195748000 | -2.196358000 |
| C | 2.611690000  | -0.954145000 | 2.715076000  |
| H | 1.566503000  | -0.747353000 | 2.476302000  |
| C | -1.662290000 | 1.593722000  | -0.092231000 |
| O | -2.915068000 | 1.047081000  | 0.197077000  |
| H | -2.946145000 | 1.258569000  | 1.179863000  |
| C | -1.656794000 | 2.182427000  | -1.468678000 |
| C | -0.698845000 | 2.313895000  | -2.424952000 |
| O | -2.794195000 | 2.795896000  | -1.880293000 |
| C | -1.284675000 | 3.063783000  | -3.488055000 |
| H | 0.304353000  | 1.922743000  | -2.378725000 |
| C | -2.555435000 | 3.325671000  | -3.103474000 |
| H | -0.822039000 | 3.358258000  | -4.417555000 |
| H | -3.382936000 | 3.838294000  | -3.567339000 |
| C | -1.443419000 | 2.685209000  | 1.084135000  |

|   |              |              |              |
|---|--------------|--------------|--------------|
| O | -2.038217000 | 2.167180000  | 2.192448000  |
| H | -0.352241000 | 2.819147000  | 1.177154000  |
| C | -2.020573000 | 4.025115000  | 0.739197000  |
| C | -3.166402000 | 4.651473000  | 1.111638000  |
| O | -1.304640000 | 4.839741000  | -0.080917000 |
| C | -3.162305000 | 5.927367000  | 0.468620000  |
| H | -3.919172000 | 4.247110000  | 1.769030000  |
| C | -2.011393000 | 5.985863000  | -0.241352000 |
| H | -3.913709000 | 6.699771000  | 0.531936000  |
| H | -1.562258000 | 6.738168000  | -0.869970000 |
| H | -1.086192000 | 1.804031000  | 3.355424000  |
| O | -0.482727000 | 1.565073000  | 4.134590000  |
| C | -0.736286000 | 2.461688000  | 5.183270000  |
| H | -0.551280000 | 3.506396000  | 4.895924000  |
| H | -1.770234000 | 2.395795000  | 5.550936000  |
| H | -0.072207000 | 2.226027000  | 6.019934000  |
| H | -4.958100000 | -3.858373000 | -0.729526000 |
| H | 6.630317000  | -1.078572000 | 0.368699000  |
| C | -0.904377000 | -2.554577000 | -3.543653000 |
| H | -0.360691000 | -2.183327000 | -4.416802000 |
| H | -0.191353000 | -3.054812000 | -2.884275000 |
| H | -1.627208000 | -3.299355000 | -3.888959000 |
| C | -2.562149000 | -0.681487000 | -3.777620000 |
| H | -3.065630000 | 0.150051000  | -3.279484000 |
| H | -2.007798000 | -0.280073000 | -4.629864000 |
| H | -3.326214000 | -1.358431000 | -4.168722000 |
| C | 2.681765000  | -2.362910000 | 3.302311000  |
| H | 3.707537000  | -2.622984000 | 3.577927000  |
| H | 2.064819000  | -2.428231000 | 4.202396000  |
| H | 2.323229000  | -3.107834000 | 2.588038000  |
| C | 3.067124000  | 0.084568000  | 3.737936000  |
| H | 4.102883000  | -0.085766000 | 4.043555000  |
| H | 2.995043000  | 1.097399000  | 3.334490000  |
| H | 2.441700000  | 0.029500000  | 4.632518000  |
| C | 3.193592000  | -1.406186000 | -3.316103000 |
| H | 2.682769000  | -1.214961000 | -4.263514000 |
| H | 4.261022000  | -1.511947000 | -3.527507000 |
| H | 2.830699000  | -2.357230000 | -2.919079000 |
| C | 3.405912000  | 1.069612000  | -2.916742000 |
| H | 2.905233000  | 1.267967000  | -3.868128000 |
| H | 3.187630000  | 1.897315000  | -2.237453000 |
| H | 4.483707000  | 1.058076000  | -3.100990000 |
| C | -3.122400000 | -1.345937000 | 3.178172000  |
| H | -2.700729000 | -1.070200000 | 4.148201000  |
| H | -3.634907000 | -0.471960000 | 2.770937000  |
| H | -3.867692000 | -2.126160000 | 3.352706000  |

|   |              |              |             |
|---|--------------|--------------|-------------|
| C | -1.329127000 | -3.065732000 | 2.831960000 |
| H | -2.040724000 | -3.891536000 | 2.923763000 |
| H | -0.502508000 | -3.397469000 | 2.199935000 |
| H | -0.933552000 | -2.848393000 | 3.827984000 |

**IPr-V-B** Etot = -1960.457695544331 a.u.

|   |              |              |              |
|---|--------------|--------------|--------------|
| C | 0.385350000  | -1.743165000 | -0.193052000 |
| C | -0.777925000 | 0.239406000  | -0.161193000 |
| C | 0.537169000  | 0.512204000  | 0.017428000  |
| H | 1.050230000  | 1.450875000  | 0.146523000  |
| N | -0.837818000 | -1.150034000 | -0.286895000 |
| N | 1.213783000  | -0.689311000 | -0.010626000 |
| C | 2.630046000  | -0.799723000 | 0.134628000  |
| C | 3.432260000  | -0.749472000 | -1.012105000 |
| C | 3.172027000  | -0.936559000 | 1.418280000  |
| C | 4.811298000  | -0.846786000 | -0.845624000 |
| C | 4.556835000  | -1.027551000 | 1.533006000  |
| C | 5.370867000  | -0.983670000 | 0.413606000  |
| H | 5.456283000  | -0.812490000 | -1.717029000 |
| H | 5.003534000  | -1.135139000 | 2.515537000  |
| C | -1.994817000 | -1.982476000 | -0.462284000 |
| C | -2.614183000 | -2.525436000 | 0.670563000  |
| C | -2.401833000 | -2.317026000 | -1.757779000 |
| C | -3.671181000 | -3.408740000 | 0.476957000  |
| C | -3.466302000 | -3.204981000 | -1.900731000 |
| C | -4.099158000 | -3.747269000 | -0.796633000 |
| H | -4.165457000 | -3.843397000 | 1.338967000  |
| H | -3.797132000 | -3.480988000 | -2.896064000 |
| C | -1.712178000 | -1.781761000 | -2.993564000 |
| H | -1.004719000 | -1.012988000 | -2.677858000 |
| C | -2.158409000 | -2.204308000 | 2.077192000  |
| H | -1.447542000 | -1.377637000 | 2.017439000  |
| C | 2.853600000  | -0.591167000 | -2.401177000 |
| H | 1.766608000  | -0.547597000 | -2.309481000 |
| C | 2.310223000  | -0.983154000 | 2.660900000  |
| H | 1.265510000  | -0.941603000 | 2.346492000  |
| C | -1.956113000 | 1.208491000  | -0.262432000 |
| O | -3.136538000 | 0.622464000  | 0.053187000  |
| H | -2.873079000 | 1.127463000  | 1.608645000  |
| C | -1.924749000 | 1.825112000  | -1.642529000 |
| C | -0.962646000 | 1.973955000  | -2.593061000 |
| O | -3.068406000 | 2.418388000  | -2.066880000 |
| C | -1.553249000 | 2.710588000  | -3.663850000 |
| H | 0.047222000  | 1.600556000  | -2.539184000 |
| C | -2.831217000 | 2.950633000  | -3.288886000 |

|   |              |              |              |
|---|--------------|--------------|--------------|
| H | -1.089532000 | 3.011052000  | -4.591070000 |
| H | -3.663535000 | 3.449906000  | -3.758893000 |
| C | -1.708833000 | 2.339326000  | 0.860715000  |
| O | -2.230887000 | 1.773379000  | 2.029233000  |
| H | -0.635624000 | 2.520059000  | 0.968305000  |
| C | -2.376676000 | 3.641013000  | 0.582082000  |
| C | -3.559508000 | 4.177626000  | 0.978193000  |
| O | -1.721443000 | 4.520292000  | -0.219257000 |
| C | -3.643229000 | 5.467621000  | 0.369552000  |
| H | -4.280666000 | 3.709073000  | 1.628672000  |
| C | -2.504050000 | 5.620749000  | -0.344825000 |
| H | -4.443515000 | 6.186401000  | 0.458189000  |
| H | -2.110505000 | 6.416553000  | -0.956642000 |
| O | -5.430956000 | 0.200166000  | -1.080729000 |
| C | -6.340143000 | 1.181780000  | -0.657153000 |
| H | -6.413652000 | 1.239246000  | 0.437824000  |
| H | -6.078644000 | 2.182755000  | -1.027622000 |
| H | -7.331912000 | 0.932262000  | -1.044357000 |
| H | -4.526647000 | 0.424883000  | -0.713817000 |
| C | 2.571381000  | 0.223811000  | 3.560602000  |
| H | 3.602298000  | 0.228012000  | 3.925343000  |
| H | 2.397329000  | 1.161251000  | 3.026771000  |
| H | 1.908153000  | 0.197838000  | 4.429218000  |
| C | 2.505953000  | -2.288774000 | 3.428779000  |
| H | 3.530727000  | -2.383110000 | 3.797861000  |
| H | 1.835686000  | -2.321635000 | 4.291715000  |
| H | 2.291385000  | -3.154776000 | 2.798056000  |
| C | -0.919004000 | -2.884957000 | -3.693589000 |
| H | -0.388967000 | -2.481354000 | -4.560843000 |
| H | -0.183118000 | -3.331738000 | -3.020965000 |
| H | -1.583678000 | -3.679337000 | -4.045289000 |
| C | -2.695795000 | -1.128374000 | -3.961210000 |
| H | -3.261507000 | -0.331289000 | -3.473611000 |
| H | -2.156243000 | -0.693422000 | -4.806599000 |
| H | -3.407515000 | -1.855338000 | -4.361389000 |
| C | -1.435283000 | -3.398965000 | 2.699141000  |
| H | -2.109036000 | -4.256391000 | 2.786408000  |
| H | -0.577123000 | -3.701291000 | 2.094758000  |
| H | -1.077111000 | -3.148654000 | 3.701689000  |
| C | -3.311741000 | -1.754096000 | 2.970992000  |
| H | -2.928709000 | -1.441043000 | 3.945903000  |
| H | -3.851196000 | -0.913949000 | 2.528630000  |
| H | -4.026126000 | -2.563551000 | 3.142685000  |
| C | 3.315951000  | 0.712677000  | -3.049267000 |
| H | 2.852181000  | 0.830817000  | -4.032143000 |
| H | 3.044693000  | 1.577297000  | -2.438509000 |

|   |              |              |              |
|---|--------------|--------------|--------------|
| H | 4.400645000  | 0.722469000  | -3.187085000 |
| C | 3.190539000  | -1.790219000 | -3.285528000 |
| H | 2.723000000  | -1.677390000 | -4.267233000 |
| H | 4.269576000  | -1.880277000 | -3.437158000 |
| H | 2.831457000  | -2.721943000 | -2.841935000 |
| H | -4.924478000 | -4.439059000 | -0.927189000 |
| H | 6.447549000  | -1.056487000 | 0.523268000  |

**VI...IPr-I(H)-B** Etot = -1960.444037547347 a.u.

|   |              |              |              |
|---|--------------|--------------|--------------|
| C | 0.473808000  | -2.313209000 | 0.587756000  |
| C | -0.479199000 | -0.246326000 | 0.323749000  |
| C | 0.782165000  | -0.176855000 | -0.154538000 |
| H | 1.327587000  | 0.641518000  | -0.595792000 |
| N | -0.635789000 | -1.548946000 | 0.764506000  |
| N | 1.335461000  | -1.433516000 | 0.015835000  |
| C | 2.664863000  | -1.772007000 | -0.381829000 |
| C | 2.882925000  | -2.229234000 | -1.686974000 |
| C | 3.705878000  | -1.627544000 | 0.542865000  |
| C | 4.187056000  | -2.552975000 | -2.052222000 |
| C | 4.992139000  | -1.966027000 | 0.130563000  |
| C | 5.233068000  | -2.424411000 | -1.153844000 |
| H | 4.384773000  | -2.912263000 | -3.056395000 |
| H | 5.817416000  | -1.868355000 | 0.827617000  |
| C | -1.849133000 | -2.039343000 | 1.337648000  |
| C | -2.797647000 | -2.640208000 | 0.501231000  |
| C | -2.055407000 | -1.890478000 | 2.714163000  |
| C | -3.975519000 | -3.102873000 | 1.082263000  |
| C | -3.249096000 | -2.369122000 | 3.247972000  |
| C | -4.201480000 | -2.970094000 | 2.442137000  |
| H | -4.727500000 | -3.573901000 | 0.458359000  |
| H | -3.434071000 | -2.269369000 | 4.312112000  |
| C | -1.032603000 | -1.242062000 | 3.621472000  |
| H | -0.190543000 | -0.922116000 | 3.004503000  |
| C | -2.581462000 | -2.797695000 | -0.988210000 |
| H | -1.605956000 | -2.372854000 | -1.232217000 |
| C | 1.760639000  | -2.383759000 | -2.690106000 |
| H | 0.831754000  | -2.075257000 | -2.206458000 |
| C | 3.474469000  | -1.127347000 | 1.951941000  |
| H | 2.410673000  | -0.906592000 | 2.059763000  |
| C | -2.557464000 | 3.299646000  | -1.341123000 |
| O | -2.041899000 | 2.432465000  | -2.033921000 |
| H | -1.270263000 | 0.501833000  | 0.384078000  |
| C | -2.512949000 | 4.693773000  | -1.753639000 |
| C | -2.880959000 | 5.867869000  | -1.154314000 |
| O | -1.993016000 | 4.964318000  | -2.985638000 |

|   |              |              |              |
|---|--------------|--------------|--------------|
| C | -2.574144000 | 6.905618000  | -2.066591000 |
| H | -3.316350000 | 5.973832000  | -0.173761000 |
| C | -2.039292000 | 6.292510000  | -3.156581000 |
| H | -2.724835000 | 7.965470000  | -1.935110000 |
| H | -1.660343000 | 6.665431000  | -4.095558000 |
| C | -3.255680000 | 2.943217000  | 0.000285000  |
| O | -2.699160000 | 1.896785000  | 0.623052000  |
| H | -3.238034000 | 3.890580000  | 0.587801000  |
| C | -4.717779000 | 2.720698000  | -0.347969000 |
| C | -5.480475000 | 1.597567000  | -0.333022000 |
| O | -5.479845000 | 3.782448000  | -0.728650000 |
| C | -6.795817000 | 1.991936000  | -0.731350000 |
| H | -5.139751000 | 0.612423000  | -0.058404000 |
| C | -6.736906000 | 3.324463000  | -0.958448000 |
| H | -7.669274000 | 1.365283000  | -0.829849000 |
| H | -7.462302000 | 4.060020000  | -1.267766000 |
| O | -0.439155000 | 2.207987000  | -4.300404000 |
| C | -1.109147000 | 1.215045000  | -5.045664000 |
| H | -1.270244000 | 0.300061000  | -4.462437000 |
| H | -2.081514000 | 1.562590000  | -5.416082000 |
| H | -0.487873000 | 0.963225000  | -5.907367000 |
| H | -0.985894000 | 2.409224000  | -3.519360000 |
| H | -5.125602000 | -3.336235000 | 2.876309000  |
| H | 6.242124000  | -2.682598000 | -1.456672000 |
| C | -3.631146000 | -2.029667000 | -1.788967000 |
| H | -3.629018000 | -0.968825000 | -1.527547000 |
| H | -3.426748000 | -2.117884000 | -2.859332000 |
| H | -4.635365000 | -2.421838000 | -1.606244000 |
| C | -2.553400000 | -4.270392000 | -1.392743000 |
| H | -2.352206000 | -4.363615000 | -2.463288000 |
| H | -1.776270000 | -4.814718000 | -0.850714000 |
| H | -3.512063000 | -4.755070000 | -1.188692000 |
| C | 1.969345000  | -1.481563000 | -3.904998000 |
| H | 2.049469000  | -0.432135000 | -3.611028000 |
| H | 2.878992000  | -1.752127000 | -4.448021000 |
| H | 1.126601000  | -1.578052000 | -4.594562000 |
| C | 1.592380000  | -3.841918000 | -3.113711000 |
| H | 0.747996000  | -3.939599000 | -3.801193000 |
| H | 2.485427000  | -4.211097000 | -3.625303000 |
| H | 1.405598000  | -4.485109000 | -2.250359000 |
| C | 4.243442000  | 0.165286000  | 2.218825000  |
| H | 4.022671000  | 0.533994000  | 3.223950000  |
| H | 5.322996000  | 0.005942000  | 2.150862000  |
| H | 3.970569000  | 0.944086000  | 1.502583000  |
| C | 3.827364000  | -2.196422000 | 2.984601000  |
| H | 3.253490000  | -3.111279000 | 2.818428000  |

|   |              |              |             |
|---|--------------|--------------|-------------|
| H | 4.890137000  | -2.450421000 | 2.943078000 |
| H | 3.608372000  | -1.834111000 | 3.992550000 |
| C | -1.599894000 | -0.000128000 | 4.306537000 |
| H | -1.957979000 | 0.727751000  | 3.574485000 |
| H | -2.434336000 | -0.256708000 | 4.964824000 |
| H | -0.828934000 | 0.478969000  | 4.915770000 |
| C | -0.495586000 | -2.237157000 | 4.648866000 |
| H | -1.290402000 | -2.585932000 | 5.313920000 |
| H | -0.054945000 | -3.109892000 | 4.160778000 |
| H | 0.274577000  | -1.765503000 | 5.265010000 |

**IPr-TS1<sup>Ph</sup>-A**  $i137\text{ cm}^{-1}$  Etot= -1620.005524787156

|   |                 |                 |                 |
|---|-----------------|-----------------|-----------------|
| H | -1.359985000000 | 4.093170000000  | 0.262833000000  |
| C | -2.226554000000 | 2.171101000000  | 0.925312000000  |
| C | -1.377304000000 | 3.017339000000  | 0.309707000000  |
| N | -1.777972000000 | 0.895291000000  | 0.638486000000  |
| C | -0.667888000000 | 0.913008000000  | -0.133370000000 |
| N | -0.433568000000 | 2.231506000000  | -0.326209000000 |
| H | -3.099615000000 | 2.355719000000  | 1.528733000000  |
| H | 2.875593000000  | -0.739976000000 | 1.215896000000  |
| O | 3.410624000000  | -1.048269000000 | 1.979212000000  |
| C | 0.811408000000  | -0.803589000000 | -0.347581000000 |
| O | 1.948795000000  | -0.333312000000 | -0.195908000000 |
| C | 0.646143000000  | 2.778760000000  | -1.098810000000 |
| C | 1.778498000000  | 3.259089000000  | -0.428675000000 |
| C | 0.507053000000  | 2.854500000000  | -2.493757000000 |
| C | 2.795678000000  | 3.818274000000  | -1.199111000000 |
| C | 1.558788000000  | 3.411462000000  | -3.214341000000 |
| C | 2.691050000000  | 3.890170000000  | -2.575604000000 |
| H | 3.684566000000  | 4.200704000000  | -0.710752000000 |
| H | 1.489746000000  | 3.479473000000  | -4.293052000000 |
| C | -2.444708000000 | -0.287728000000 | 1.100752000000  |
| C | -3.497298000000 | -0.805123000000 | 0.334066000000  |
| C | -2.053742000000 | -0.851653000000 | 2.321367000000  |
| C | -4.152219000000 | -1.934208000000 | 0.817497000000  |
| C | -2.742925000000 | -1.979575000000 | 2.759750000000  |
| C | -3.778880000000 | -2.517742000000 | 2.016207000000  |
| H | -4.971581000000 | -2.359798000000 | 0.249849000000  |
| H | -2.466989000000 | -2.439368000000 | 3.701600000000  |
| C | 1.913511000000  | 3.220787000000  | 1.078798000000  |
| H | 1.150833000000  | 2.542605000000  | 1.468178000000  |
| C | -0.963389000000 | -0.246539000000 | 3.178027000000  |
| H | -0.385057000000 | 0.436582000000  | 2.550766000000  |
| C | -3.965916000000 | -0.145523000000 | -0.944771000000 |
| H | -3.183278000000 | 0.539069000000  | -1.277951000000 |

|   |                 |                 |                 |
|---|-----------------|-----------------|-----------------|
| C | -0.758228000000 | 2.412261000000  | -3.198953000000 |
| H | -1.186864000000 | 1.587578000000  | -2.622644000000 |
| H | 0.267852000000  | -1.229372000000 | 0.508254000000  |
| C | 4.325763000000  | -2.013417000000 | 1.514172000000  |
| H | 5.025720000000  | -1.599630000000 | 0.777375000000  |
| H | 4.905913000000  | -2.370974000000 | 2.367504000000  |
| H | 3.822375000000  | -2.876446000000 | 1.060665000000  |
| H | 3.496806000000  | 4.324416000000  | -3.157517000000 |
| H | -4.302777000000 | -3.396692000000 | 2.375881000000  |
| C | 3.270400000000  | 2.690287000000  | 1.533213000000  |
| H | 3.285282000000  | 2.602111000000  | 2.622587000000  |
| H | 3.475549000000  | 1.705989000000  | 1.110262000000  |
| H | 4.082171000000  | 3.364330000000  | 1.248765000000  |
| C | 1.662846000000  | 4.606328000000  | 1.677318000000  |
| H | 0.686219000000  | 5.002645000000  | 1.391834000000  |
| H | 1.705926000000  | 4.559842000000  | 2.768612000000  |
| H | 2.425414000000  | 5.313464000000  | 1.338343000000  |
| C | -1.574578000000 | 0.571315000000  | 4.317509000000  |
| H | -2.242638000000 | 1.349240000000  | 3.940654000000  |
| H | -2.149736000000 | -0.073703000000 | 4.987798000000  |
| H | -0.786601000000 | 1.052255000000  | 4.902566000000  |
| C | 0.002519000000  | -1.288783000000 | 3.734220000000  |
| H | -0.493892000000 | -1.961321000000 | 4.438085000000  |
| H | 0.447272000000  | -1.895717000000 | 2.942522000000  |
| H | 0.812037000000  | -0.789605000000 | 4.272188000000  |
| C | -5.228449000000 | 0.678982000000  | -0.683534000000 |
| H | -5.539951000000 | 1.193277000000  | -1.596545000000 |
| H | -6.049379000000 | 0.031558000000  | -0.362220000000 |
| H | -5.067136000000 | 1.429922000000  | 0.092933000000  |
| C | -4.207390000000 | -1.142407000000 | -2.073789000000 |
| H | -3.317545000000 | -1.744450000000 | -2.269174000000 |
| H | -5.037293000000 | -1.816782000000 | -1.848526000000 |
| H | -4.463318000000 | -0.604399000000 | -2.990136000000 |
| C | -0.522634000000 | 1.903838000000  | -4.615952000000 |
| H | -0.216845000000 | 2.708107000000  | -5.289982000000 |
| H | 0.237591000000  | 1.120494000000  | -4.645725000000 |
| H | -1.452447000000 | 1.486250000000  | -5.009861000000 |
| C | -1.779150000000 | 3.554062000000  | -3.223041000000 |
| H | -1.399304000000 | 4.388253000000  | -3.820096000000 |
| H | -2.716637000000 | 3.215512000000  | -3.671978000000 |
| H | -1.999401000000 | 3.927682000000  | -2.221621000000 |
| C | 0.381755000000  | -1.365080000000 | -1.659694000000 |
| C | 1.023258000000  | -0.992337000000 | -2.837943000000 |
| C | -0.595843000000 | -2.353770000000 | -1.696533000000 |
| C | 0.679234000000  | -1.590640000000 | -4.038927000000 |
| C | -0.934127000000 | -2.962117000000 | -2.897725000000 |

|   |                 |                 |                 |
|---|-----------------|-----------------|-----------------|
| C | -0.298966000000 | -2.578895000000 | -4.071541000000 |
| H | 1.790851000000  | -0.227845000000 | -2.796735000000 |
| H | -1.091709000000 | -2.649221000000 | -0.776964000000 |
| H | 1.172902000000  | -1.284329000000 | -4.954731000000 |
| H | -1.694713000000 | -3.734830000000 | -2.920308000000 |
| H | -0.563327000000 | -3.051046000000 | -5.011302000000 |

**IPr-II<sup>Ph</sup>-A**

Etot = -1620.035617342329

|   |                 |                 |                 |
|---|-----------------|-----------------|-----------------|
| C | -0.285088000000 | -0.268107000000 | -0.023228000000 |
| C | -1.041587000000 | -2.279756000000 | -0.597106000000 |
| H | -1.770797000000 | -3.063092000000 | -0.709484000000 |
| C | 0.263949000000  | -2.230798000000 | -0.924531000000 |
| H | 0.911245000000  | -2.962397000000 | -1.376632000000 |
| N | -1.369458000000 | -1.062218000000 | -0.038259000000 |
| N | 0.717756000000  | -0.982008000000 | -0.565055000000 |
| C | 2.063325000000  | -0.535114000000 | -0.812154000000 |
| C | 3.018921000000  | -0.687949000000 | 0.199878000000  |
| C | 2.368511000000  | -0.032410000000 | -2.082654000000 |
| C | 4.319213000000  | -0.283859000000 | -0.086752000000 |
| C | 3.685836000000  | 0.354937000000  | -2.313037000000 |
| C | 4.649322000000  | 0.235704000000  | -1.327033000000 |
| H | 5.087064000000  | -0.383736000000 | 0.670937000000  |
| H | 3.961462000000  | 0.749082000000  | -3.284083000000 |
| C | -2.701008000000 | -0.782684000000 | 0.437051000000  |
| C | -3.058708000000 | -1.244207000000 | 1.709606000000  |
| C | -3.603405000000 | -0.158699000000 | -0.432773000000 |
| C | -4.367578000000 | -1.014791000000 | 2.124150000000  |
| C | -4.897594000000 | 0.046069000000  | 0.036512000000  |
| C | -5.274818000000 | -0.369605000000 | 1.302085000000  |
| H | -4.681623000000 | -1.352107000000 | 3.104708000000  |
| H | -5.625031000000 | 0.530752000000  | -0.603319000000 |
| C | -3.232030000000 | 0.217456000000  | -1.850712000000 |
| H | -2.149752000000 | 0.359283000000  | -1.883636000000 |
| C | -2.108817000000 | -2.018007000000 | 2.599087000000  |
| H | -1.088343000000 | -1.832973000000 | 2.252506000000  |
| C | 2.694727000000  | -1.320816000000 | 1.535535000000  |
| H | 1.613245000000  | -1.267290000000 | 1.686213000000  |
| C | 1.352364000000  | 0.038048000000  | -3.202623000000 |
| H | 0.356688000000  | -0.066023000000 | -2.765733000000 |
| C | -0.153247000000 | 1.210396000000  | 0.312889000000  |
| O | -0.578826000000 | 1.919756000000  | -0.759697000000 |
| H | 0.379179000000  | 3.084798000000  | -0.998553000000 |
| H | 0.937643000000  | 1.316741000000  | 0.494400000000  |
| O | 1.045415000000  | 3.841042000000  | -1.166017000000 |
| C | 0.712923000000  | 4.924256000000  | -0.340966000000 |

|   |                 |                 |                 |
|---|-----------------|-----------------|-----------------|
| H | 0.738450000000  | 4.663819000000  | 0.727056000000  |
| H | 1.436202000000  | 5.729600000000  | -0.500935000000 |
| H | -0.286341000000 | 5.328548000000  | -0.559073000000 |
| C | -0.794029000000 | 1.606883000000  | 1.645009000000  |
| C | -1.976380000000 | 2.336826000000  | 1.663345000000  |
| C | -0.143538000000 | 1.358466000000  | 2.850133000000  |
| C | -2.508504000000 | 2.795036000000  | 2.861214000000  |
| C | -0.664352000000 | 1.823586000000  | 4.049999000000  |
| C | -1.852465000000 | 2.542909000000  | 4.059578000000  |
| H | -2.462900000000 | 2.556163000000  | 0.720548000000  |
| H | 0.794792000000  | 0.812894000000  | 2.849172000000  |
| H | -3.432889000000 | 3.363116000000  | 2.858572000000  |
| H | -0.137566000000 | 1.630603000000  | 4.978482000000  |
| H | -2.259822000000 | 2.912358000000  | 4.994324000000  |
| H | 5.669295000000  | 0.544156000000  | -1.528455000000 |
| H | -6.289154000000 | -0.199367000000 | 1.646217000000  |
| C | 3.355508000000  | -0.602866000000 | 2.708358000000  |
| H | 2.987340000000  | -1.019267000000 | 3.648879000000  |
| H | 4.440705000000  | -0.729064000000 | 2.698090000000  |
| H | 3.139416000000  | 0.467799000000  | 2.700251000000  |
| C | 3.087079000000  | -2.800057000000 | 1.527934000000  |
| H | 2.818374000000  | -3.266649000000 | 2.479093000000  |
| H | 2.586861000000  | -3.347185000000 | 0.725924000000  |
| H | 4.166488000000  | -2.907524000000 | 1.389317000000  |
| C | -2.179429000000 | -1.588256000000 | 4.061220000000  |
| H | -3.139059000000 | -1.853817000000 | 4.511280000000  |
| H | -1.399649000000 | -2.100293000000 | 4.630486000000  |
| H | -2.032318000000 | -0.513153000000 | 4.171165000000  |
| C | -2.381890000000 | -3.520486000000 | 2.488937000000  |
| H | -2.307398000000 | -3.879423000000 | 1.460930000000  |
| H | -1.665481000000 | -4.078043000000 | 3.097601000000  |
| H | -3.387190000000 | -3.749895000000 | 2.853241000000  |
| C | -3.613599000000 | -0.910390000000 | -2.812365000000 |
| H | -3.305937000000 | -0.657202000000 | -3.830404000000 |
| H | -3.140370000000 | -1.856482000000 | -2.541037000000 |
| H | -4.696727000000 | -1.063762000000 | -2.813925000000 |
| C | -3.859623000000 | 1.530494000000  | -2.306039000000 |
| H | -3.461311000000 | 1.803674000000  | -3.286230000000 |
| H | -4.945057000000 | 1.452137000000  | -2.406539000000 |
| H | -3.636897000000 | 2.342829000000  | -1.611008000000 |
| C | 1.564028000000  | -1.118578000000 | -4.181725000000 |
| H | 2.544952000000  | -1.042757000000 | -4.659319000000 |
| H | 1.506252000000  | -2.088585000000 | -3.683046000000 |
| H | 0.802703000000  | -1.092122000000 | -4.965593000000 |
| C | 1.381452000000  | 1.372490000000  | -3.942143000000 |
| H | 2.319984000000  | 1.512538000000  | -4.484229000000 |

|   |                |                |                 |
|---|----------------|----------------|-----------------|
| H | 0.572743000000 | 1.400752000000 | -4.676746000000 |
| H | 1.251328000000 | 2.211811000000 | -3.256734000000 |

**IPr-TS2<sup>Ph</sup>-A**  $i$ 1191 cm<sup>-1</sup> Etot = -1619.995578804062

|   |                 |                 |                 |
|---|-----------------|-----------------|-----------------|
| C | -0.366954000000 | -0.128151000000 | -0.004324000000 |
| C | -1.162862000000 | -2.110298000000 | -0.687137000000 |
| H | -1.920359000000 | -2.839541000000 | -0.916614000000 |
| C | 0.174347000000  | -2.172066000000 | -0.754305000000 |
| H | 0.834533000000  | -2.962395000000 | -1.066183000000 |
| N | -1.496644000000 | -0.850183000000 | -0.223651000000 |
| N | 0.664180000000  | -0.951002000000 | -0.330559000000 |
| C | 2.077679000000  | -0.692755000000 | -0.312798000000 |
| C | 2.823660000000  | -1.143586000000 | 0.783304000000  |
| C | 2.664902000000  | -0.108194000000 | -1.441937000000 |
| C | 4.201553000000  | -0.951098000000 | 0.741806000000  |
| C | 4.045640000000  | 0.064145000000  | -1.428017000000 |
| C | 4.806248000000  | -0.346447000000 | -0.346478000000 |
| H | 4.811262000000  | -1.285396000000 | 1.572923000000  |
| H | 4.534988000000  | 0.516435000000  | -2.282227000000 |
| C | -2.883760000000 | -0.518741000000 | -0.020047000000 |
| C | -3.446215000000 | -0.734549000000 | 1.242864000000  |
| C | -3.640093000000 | -0.122267000000 | -1.127008000000 |
| C | -4.811907000000 | -0.512785000000 | 1.383738000000  |
| C | -5.003339000000 | 0.086817000000  | -0.930784000000 |
| C | -5.585120000000 | -0.102373000000 | 0.310001000000  |
| H | -5.279660000000 | -0.668738000000 | 2.348968000000  |
| H | -5.618911000000 | 0.395878000000  | -1.767863000000 |
| C | -3.048266000000 | 0.044423000000  | -2.510707000000 |
| H | -1.959371000000 | 0.009924000000  | -2.423503000000 |
| C | -2.632986000000 | -1.226553000000 | 2.420142000000  |
| H | -1.575330000000 | -1.083005000000 | 2.186374000000  |
| C | 2.195736000000  | -1.867066000000 | 1.955461000000  |
| H | 1.120897000000  | -1.667253000000 | 1.940803000000  |
| C | 1.863914000000  | 0.262893000000  | -2.671716000000 |
| H | 0.819315000000  | 0.383801000000  | -2.374882000000 |
| C | -0.294411000000 | 1.282254000000  | 0.357200000000  |
| O | -1.572552000000 | 1.758452000000  | 0.755902000000  |
| H | -1.777144000000 | 2.408211000000  | 0.058852000000  |
| H | -0.206579000000 | 2.031935000000  | -0.714056000000 |
| O | -0.669709000000 | 2.949034000000  | -1.524091000000 |
| C | -0.149861000000 | 4.210808000000  | -1.273477000000 |
| H | -0.109689000000 | 4.458104000000  | -0.197827000000 |
| H | 0.878106000000  | 4.340160000000  | -1.658149000000 |
| H | -0.760792000000 | 4.996048000000  | -1.748393000000 |
| C | -2.859788000000 | -2.723250000000 | 2.640813000000  |

|   |                 |                 |                 |
|---|-----------------|-----------------|-----------------|
| H | -2.238803000000 | -3.083379000000 | 3.465296000000  |
| H | -3.905709000000 | -2.919725000000 | 2.893125000000  |
| H | -2.612629000000 | -3.303433000000 | 1.748906000000  |
| C | -2.923355000000 | -0.448684000000 | 3.700551000000  |
| H | -2.236492000000 | -0.765790000000 | 4.489203000000  |
| H | -2.801258000000 | 0.626570000000  | 3.552615000000  |
| H | -3.939606000000 | -0.628520000000 | 4.059704000000  |
| C | -3.410292000000 | 1.387345000000  | -3.140045000000 |
| H | -4.488257000000 | 1.482905000000  | -3.290935000000 |
| H | -3.064783000000 | 2.217553000000  | -2.521679000000 |
| H | -2.931764000000 | 1.475155000000  | -4.118959000000 |
| C | -3.480424000000 | -1.105996000000 | -3.421563000000 |
| H | -4.565454000000 | -1.101719000000 | -3.558679000000 |
| H | -3.015471000000 | -1.003383000000 | -4.405495000000 |
| H | -3.196724000000 | -2.076949000000 | -3.009363000000 |
| C | 2.310404000000  | 1.576905000000  | -3.304811000000 |
| H | 2.311232000000  | 2.394706000000  | -2.581234000000 |
| H | 3.311847000000  | 1.499165000000  | -3.734794000000 |
| H | 1.626822000000  | 1.842870000000  | -4.114493000000 |
| C | 2.396985000000  | -3.378566000000 | 1.820817000000  |
| H | 1.907591000000  | -3.898208000000 | 2.648630000000  |
| H | 1.987654000000  | -3.766601000000 | 0.886339000000  |
| H | 3.462424000000  | -3.623868000000 | 1.849779000000  |
| C | 2.731997000000  | -1.392346000000 | 3.302649000000  |
| H | 2.639684000000  | -0.311043000000 | 3.412760000000  |
| H | 2.167478000000  | -1.867498000000 | 4.108878000000  |
| H | 3.781818000000  | -1.664983000000 | 3.435589000000  |
| H | -6.648824000000 | 0.063782000000  | 0.440929000000  |
| H | 5.881453000000  | -0.204678000000 | -0.357553000000 |
| C | 1.929533000000  | -0.866964000000 | -3.702355000000 |
| H | 2.958804000000  | -1.013752000000 | -4.041847000000 |
| H | 1.571250000000  | -1.813154000000 | -3.291491000000 |
| H | 1.316678000000  | -0.619231000000 | -4.572939000000 |
| C | 0.756444000000  | 1.710788000000  | 1.352022000000  |
| C | 0.503424000000  | 1.611941000000  | 2.721244000000  |
| C | 1.933271000000  | 2.333082000000  | 0.944558000000  |
| C | 1.398541000000  | 2.117837000000  | 3.652237000000  |
| C | 2.841005000000  | 2.827419000000  | 1.872558000000  |
| C | 2.575089000000  | 2.725386000000  | 3.230913000000  |
| H | -0.416488000000 | 1.148723000000  | 3.059433000000  |
| H | 2.135446000000  | 2.444461000000  | -0.114074000000 |
| H | 1.179236000000  | 2.034139000000  | 4.711428000000  |
| H | 3.750492000000  | 3.309830000000  | 1.530796000000  |
| H | 3.276387000000  | 3.121488000000  | 3.957131000000  |

**IPr-III<sup>Ph</sup>-A**

Etot = -1620.022258285446

|   |                 |                 |                 |
|---|-----------------|-----------------|-----------------|
| C | -0.271612000000 | -0.283316000000 | -0.054082000000 |
| C | -1.123489000000 | -2.157584000000 | -1.003078000000 |
| H | -1.892100000000 | -2.844845000000 | -1.312984000000 |
| C | 0.201026000000  | -2.193808000000 | -1.178811000000 |
| H | 0.826201000000  | -2.941399000000 | -1.633981000000 |
| N | -1.432620000000 | -0.990463000000 | -0.316829000000 |
| N | 0.747968000000  | -1.051191000000 | -0.598035000000 |
| C | 2.146694000000  | -0.962113000000 | -0.325288000000 |
| C | 3.030551000000  | -0.719719000000 | -1.390123000000 |
| C | 2.608776000000  | -1.206590000000 | 0.976711000000  |
| C | 4.393148000000  | -0.675064000000 | -1.109383000000 |
| C | 3.979372000000  | -1.126211000000 | 1.206684000000  |
| C | 4.865854000000  | -0.856037000000 | 0.178417000000  |
| H | 5.095382000000  | -0.493227000000 | -1.914977000000 |
| H | 4.360215000000  | -1.307964000000 | 2.205617000000  |
| C | -2.772356000000 | -0.503343000000 | -0.233297000000 |
| C | -3.624191000000 | -1.035527000000 | 0.744257000000  |
| C | -3.215971000000 | 0.436780000000  | -1.172683000000 |
| C | -4.942559000000 | -0.591931000000 | 0.771618000000  |
| C | -4.539897000000 | 0.862423000000  | -1.091697000000 |
| C | -5.397454000000 | 0.355089000000  | -0.131157000000 |
| H | -5.623646000000 | -0.991151000000 | 1.515033000000  |
| H | -4.907202000000 | 1.592669000000  | -1.804677000000 |
| C | -2.331263000000 | 0.974816000000  | -2.276596000000 |
| H | -1.342736000000 | 0.523748000000  | -2.173428000000 |
| C | -3.157337000000 | -2.074168000000 | 1.740437000000  |
| H | -2.070379000000 | -2.147320000000 | 1.657549000000  |
| C | 2.562793000000  | -0.562788000000 | -2.823387000000 |
| H | 1.479169000000  | -0.417962000000 | -2.809648000000 |
| C | 1.699815000000  | -1.647517000000 | 2.104294000000  |
| H | 0.665739000000  | -1.544807000000 | 1.774471000000  |
| C | -0.200892000000 | 0.889130000000  | 0.676167000000  |
| O | -1.273031000000 | 1.089146000000  | 1.556797000000  |
| H | -1.193412000000 | 1.095412000000  | 3.412044000000  |
| O | -1.210339000000 | 1.161871000000  | 4.382870000000  |
| C | -2.204056000000 | 2.098962000000  | 4.740027000000  |
| H | -2.206505000000 | 2.186327000000  | 5.827850000000  |
| H | -2.004104000000 | 3.090936000000  | 4.317335000000  |
| H | -3.203556000000 | 1.780613000000  | 4.419616000000  |
| H | -1.797169000000 | 1.845572000000  | 1.264240000000  |
| H | -6.427094000000 | 0.693613000000  | -0.089778000000 |
| H | 5.930735000000  | -0.806518000000 | 0.378245000000  |
| C | 1.935677000000  | -3.125716000000 | 2.420310000000  |
| H | 1.243934000000  | -3.459664000000 | 3.198317000000  |
| H | 1.783242000000  | -3.750547000000 | 1.536884000000  |

|   |                 |                 |                 |
|---|-----------------|-----------------|-----------------|
| H | 2.954834000000  | -3.291054000000 | 2.780531000000  |
| C | 1.864663000000  | -0.793879000000 | 3.358018000000  |
| H | 1.690090000000  | 0.262475000000  | 3.143486000000  |
| H | 1.148881000000  | -1.109592000000 | 4.121233000000  |
| H | 2.866614000000  | -0.896084000000 | 3.782999000000  |
| C | -3.482929000000 | -1.682648000000 | 3.179624000000  |
| H | -4.561797000000 | -1.647053000000 | 3.351212000000  |
| H | -3.063925000000 | -2.420499000000 | 3.868852000000  |
| H | -3.064202000000 | -0.706434000000 | 3.432172000000  |
| C | -3.746448000000 | -3.447071000000 | 1.414522000000  |
| H | -3.491229000000 | -3.765609000000 | 0.401311000000  |
| H | -3.367921000000 | -4.197684000000 | 2.113446000000  |
| H | -4.836991000000 | -3.428618000000 | 1.496996000000  |
| C | -2.869705000000 | 0.582902000000  | -3.652221000000 |
| H | -2.965281000000 | -0.501519000000 | -3.746380000000 |
| H | -3.852238000000 | 1.026759000000  | -3.833733000000 |
| H | -2.193116000000 | 0.935270000000  | -4.435232000000 |
| C | -2.157992000000 | 2.488497000000  | -2.171464000000 |
| H | -1.476926000000 | 2.845053000000  | -2.948660000000 |
| H | -3.112672000000 | 3.005432000000  | -2.300949000000 |
| H | -1.745062000000 | 2.773352000000  | -1.200837000000 |
| C | 2.860434000000  | -1.830322000000 | -3.628732000000 |
| H | 2.471510000000  | -1.731451000000 | -4.645529000000 |
| H | 3.939821000000  | -1.993662000000 | -3.694784000000 |
| H | 2.415847000000  | -2.720247000000 | -3.179710000000 |
| C | 3.183783000000  | 0.640744000000  | -3.529873000000 |
| H | 3.007119000000  | 1.571986000000  | -2.989490000000 |
| H | 4.263053000000  | 0.520322000000  | -3.650881000000 |
| H | 2.751663000000  | 0.742658000000  | -4.528479000000 |
| C | 0.807274000000  | 1.915494000000  | 0.651240000000  |
| C | 0.936895000000  | 2.814270000000  | 1.730394000000  |
| C | 1.636471000000  | 2.146059000000  | -0.462890000000 |
| C | 1.859988000000  | 3.846946000000  | 1.705690000000  |
| C | 2.563122000000  | 3.172934000000  | -0.476887000000 |
| C | 2.692288000000  | 4.034465000000  | 0.608606000000  |
| H | 0.308162000000  | 2.687866000000  | 2.603262000000  |
| H | 1.515542000000  | 1.529398000000  | -1.343668000000 |
| H | 1.931885000000  | 4.512210000000  | 2.560420000000  |
| H | 3.179783000000  | 3.319481000000  | -1.358265000000 |
| H | 3.413834000000  | 4.843147000000  | 0.590817000000  |

**IPr-TS1<sup>Ph</sup>-B**  $i221\text{ cm}^{-1}$  Etot = -1619.491471909139

|   |                 |                 |                 |
|---|-----------------|-----------------|-----------------|
| C | -0.083486000000 | -2.708396000000 | -0.910252000000 |
| C | -1.452367000000 | -0.943638000000 | -1.356157000000 |
| H | -2.394177000000 | -0.418474000000 | -1.374679000000 |

|   |                 |                 |                 |
|---|-----------------|-----------------|-----------------|
| C | -0.222777000000 | -0.566899000000 | -1.783448000000 |
| H | 2.687042000000  | 1.767200000000  | -2.711834000000 |
| N | -1.347618000000 | -2.230024000000 | -0.839079000000 |
| N | 0.581589000000  | -1.666193000000 | -1.489505000000 |
| C | 1.981898000000  | -1.736869000000 | -1.762788000000 |
| C | 2.892575000000  | -1.405295000000 | -0.749930000000 |
| C | 2.408417000000  | -2.160957000000 | -3.027405000000 |
| C | 4.251955000000  | -1.506655000000 | -1.032845000000 |
| C | 3.778833000000  | -2.239164000000 | -3.265999000000 |
| C | 4.695208000000  | -1.916547000000 | -2.279501000000 |
| H | 4.975950000000  | -1.263243000000 | -0.262901000000 |
| H | 4.132058000000  | -2.566830000000 | -4.238074000000 |
| C | -2.445814000000 | -2.950984000000 | -0.287412000000 |
| C | -3.196692000000 | -3.792192000000 | -1.118387000000 |
| C | -2.756161000000 | -2.778061000000 | 1.067473000000  |
| C | -4.273454000000 | -4.473409000000 | -0.556574000000 |
| C | -3.842791000000 | -3.479308000000 | 1.583732000000  |
| C | -4.596227000000 | -4.320482000000 | 0.781686000000  |
| H | -4.868043000000 | -5.134273000000 | -1.178279000000 |
| H | -4.101591000000 | -3.365256000000 | 2.631068000000  |
| C | -1.949712000000 | -1.867662000000 | 1.967903000000  |
| H | -1.150028000000 | -1.429223000000 | 1.367668000000  |
| C | -2.871274000000 | -3.978456000000 | -2.584098000000 |
| H | -2.002068000000 | -3.358760000000 | -2.813138000000 |
| C | 2.442864000000  | -0.983055000000 | 0.632495000000  |
| H | 1.365689000000  | -0.808519000000 | 0.591033000000  |
| C | 1.435699000000  | -2.567812000000 | -4.113802000000 |
| H | 0.424973000000  | -2.429552000000 | -3.724748000000 |
| O | 3.519314000000  | 1.758279000000  | -3.270041000000 |
| C | 4.532723000000  | 2.421521000000  | -2.560451000000 |
| H | 5.426087000000  | 2.471180000000  | -3.188717000000 |
| H | 4.252286000000  | 3.450177000000  | -2.295190000000 |
| H | 4.804532000000  | 1.896420000000  | -1.633826000000 |
| C | 0.365411000000  | 1.290027000000  | -2.552535000000 |
| H | 0.600487000000  | 0.883946000000  | -3.549118000000 |
| O | 1.314052000000  | 1.820721000000  | -1.882875000000 |
| H | -5.439031000000 | -4.859159000000 | 1.201428000000  |
| H | 5.758694000000  | -1.986852000000 | -2.481563000000 |
| C | -2.497883000000 | -5.427778000000 | -2.890153000000 |
| H | -3.340708000000 | -6.099770000000 | -2.706019000000 |
| H | -2.210727000000 | -5.530957000000 | -3.940043000000 |
| H | -1.659896000000 | -5.759617000000 | -2.272511000000 |
| C | -4.021373000000 | -3.513348000000 | -3.475523000000 |
| H | -3.742377000000 | -3.603118000000 | -4.528781000000 |
| H | -4.917644000000 | -4.118793000000 | -3.314451000000 |
| H | -4.278810000000 | -2.469682000000 | -3.278965000000 |

|   |                 |                 |                 |
|---|-----------------|-----------------|-----------------|
| C | 1.596914000000  | -4.045990000000 | -4.467029000000 |
| H | 0.842623000000  | -4.344701000000 | -5.200021000000 |
| H | 2.581516000000  | -4.243860000000 | -4.899856000000 |
| H | 1.483857000000  | -4.678225000000 | -3.583020000000 |
| C | 1.576120000000  | -1.696205000000 | -5.360221000000 |
| H | 2.586361000000  | -1.749952000000 | -5.774315000000 |
| H | 0.879327000000  | -2.031732000000 | -6.133336000000 |
| H | 1.352808000000  | -0.650515000000 | -5.138503000000 |
| C | 3.104107000000  | 0.315092000000  | 1.089582000000  |
| H | 2.695477000000  | 0.620291000000  | 2.056657000000  |
| H | 4.183944000000  | 0.196317000000  | 1.211866000000  |
| H | 2.928585000000  | 1.121958000000  | 0.374785000000  |
| C | 2.692545000000  | -2.100352000000 | 1.645459000000  |
| H | 2.177862000000  | -3.018995000000 | 1.354566000000  |
| H | 3.761378000000  | -2.319411000000 | 1.725891000000  |
| H | 2.333738000000  | -1.804717000000 | 2.635327000000  |
| C | -1.294896000000 | -2.648949000000 | 3.105506000000  |
| H | -2.045660000000 | -3.102696000000 | 3.758371000000  |
| H | -0.654724000000 | -3.446140000000 | 2.719795000000  |
| H | -0.679604000000 | -1.982568000000 | 3.715930000000  |
| C | -2.801392000000 | -0.721437000000 | 2.511205000000  |
| H | -3.242865000000 | -0.136197000000 | 1.700187000000  |
| H | -3.614145000000 | -1.094987000000 | 3.140248000000  |
| H | -2.188334000000 | -0.051395000000 | 3.119792000000  |
| C | -0.993592000000 | 1.924450000000  | -2.533645000000 |
| C | -1.909996000000 | 1.661871000000  | -3.549410000000 |
| C | -1.345184000000 | 2.821088000000  | -1.529398000000 |
| C | -3.158025000000 | 2.267253000000  | -3.553770000000 |
| C | -2.595235000000 | 3.425505000000  | -1.526549000000 |
| C | -3.507594000000 | 3.149694000000  | -2.537403000000 |
| H | -1.637207000000 | 0.973070000000  | -4.343972000000 |
| H | -0.623314000000 | 3.043787000000  | -0.751576000000 |
| H | -3.859817000000 | 2.054843000000  | -4.353375000000 |
| H | -2.857786000000 | 4.118391000000  | -0.734056000000 |
| H | -4.482606000000 | 3.624579000000  | -2.538261000000 |

**IPr-II<sup>Ph</sup>-B**

Etot = -1619.533936179433

|   |              |              |              |
|---|--------------|--------------|--------------|
| C | -0.710146000 | -0.676996000 | 0.690327000  |
| C | 0.474289000  | -1.079606000 | 0.175667000  |
| N | -1.688632000 | -1.018686000 | -0.225200000 |
| C | -1.184213000 | -1.639184000 | -1.318814000 |
| N | 0.150602000  | -1.658973000 | -1.051471000 |
| H | -0.937403000 | -0.186198000 | 1.622311000  |
| O | 1.363324000  | 2.365000000  | -0.158051000 |
| C | 1.890052000  | -0.903292000 | 0.689975000  |

|   |              |              |              |
|---|--------------|--------------|--------------|
| O | 2.532268000  | 0.144468000  | 0.100270000  |
| H | 1.812776000  | 1.438386000  | -0.032740000 |
| C | 2.333407000  | 3.359935000  | 0.000233000  |
| H | 2.826506000  | 3.315354000  | 0.983445000  |
| H | 3.123420000  | 3.307508000  | -0.764511000 |
| H | 1.861860000  | 4.344594000  | -0.084512000 |
| H | 2.400672000  | -1.863909000 | 0.460984000  |
| C | -3.076700000 | -0.751486000 | -0.026825000 |
| C | -3.605030000 | 0.460786000  | -0.487682000 |
| C | -3.861542000 | -1.701357000 | 0.638460000  |
| C | -4.958674000 | 0.704779000  | -0.270678000 |
| C | -5.210062000 | -1.411860000 | 0.830370000  |
| C | -5.755864000 | -0.220853000 | 0.381587000  |
| H | -5.393857000 | 1.635725000  | -0.617813000 |
| H | -5.841473000 | -2.131315000 | 1.340620000  |
| C | 1.083921000  | -2.274478000 | -1.943961000 |
| C | 1.531453000  | -1.562716000 | -3.065558000 |
| C | 1.491048000  | -3.591859000 | -1.692554000 |
| C | 2.405046000  | -2.205458000 | -3.939076000 |
| C | 2.370897000  | -4.188095000 | -2.592430000 |
| C | 2.825455000  | -3.503901000 | -3.706585000 |
| H | 2.759321000  | -1.679604000 | -4.818677000 |
| H | 2.695077000  | -5.208987000 | -2.423390000 |
| C | 1.070628000  | -0.154336000 | -3.373056000 |
| H | 0.558948000  | 0.228644000  | -2.487913000 |
| C | 0.963424000  | -4.393902000 | -0.521975000 |
| H | 0.428675000  | -3.711044000 | 0.141453000  |
| C | -2.758865000 | 1.495480000  | -1.196639000 |
| H | -1.749176000 | 1.092470000  | -1.295402000 |
| C | -3.294009000 | -3.008937000 | 1.146157000  |
| H | -2.234347000 | -3.038358000 | 0.884924000  |
| H | 3.506948000  | -3.986119000 | -4.399204000 |
| H | -6.808321000 | -0.012666000 | 0.541540000  |
| C | 2.234192000  | 0.786240000  | -3.677578000 |
| H | 2.967136000  | 0.787049000  | -2.868046000 |
| H | 2.747013000  | 0.507447000  | -4.601740000 |
| H | 1.863116000  | 1.806864000  | -3.802398000 |
| C | 0.068323000  | -0.154538000 | -4.527427000 |
| H | 0.533849000  | -0.528127000 | -5.444240000 |
| H | -0.794707000 | -0.784218000 | -4.301507000 |
| H | -0.288599000 | 0.860954000  | -4.720432000 |
| C | -3.280027000 | 1.774896000  | -2.604838000 |
| H | -3.320424000 | 0.859902000  | -3.200702000 |
| H | -4.284148000 | 2.206768000  | -2.578402000 |
| H | -2.624053000 | 2.485462000  | -3.114595000 |
| C | -2.664103000 | 2.785526000  | -0.383531000 |

|   |              |              |              |
|---|--------------|--------------|--------------|
| H | -3.646824000 | 3.250243000  | -0.264352000 |
| H | -2.254924000 | 2.597715000  | 0.612078000  |
| H | -2.012215000 | 3.502845000  | -0.889035000 |
| C | -3.965316000 | -4.205701000 | 0.475075000  |
| H | -3.866573000 | -4.156522000 | -0.612005000 |
| H | -3.505973000 | -5.136736000 | 0.817611000  |
| H | -5.030706000 | -4.249411000 | 0.717171000  |
| C | -3.397818000 | -3.106835000 | 2.667208000  |
| H | -4.441482000 | -3.103893000 | 2.993515000  |
| H | -2.940157000 | -4.035840000 | 3.017348000  |
| H | -2.888653000 | -2.271442000 | 3.154034000  |
| C | -0.037362000 | -5.445158000 | -1.003077000 |
| H | -0.453364000 | -5.991854000 | -0.152380000 |
| H | -0.862857000 | -4.984617000 | -1.550946000 |
| H | 0.447818000  | -6.168219000 | -1.665027000 |
| C | 2.079384000  | -5.044178000 | 0.291449000  |
| H | 2.802036000  | -4.302605000 | 0.640296000  |
| H | 1.658741000  | -5.546452000 | 1.166493000  |
| H | 2.618361000  | -5.795119000 | -0.291844000 |
| C | 1.854407000  | -0.842738000 | 2.221412000  |
| C | 1.485677000  | -1.953349000 | 2.980360000  |
| C | 2.221488000  | 0.319237000  | 2.886997000  |
| C | 1.473731000  | -1.900077000 | 4.365979000  |
| C | 2.207968000  | 0.381610000  | 4.277068000  |
| C | 1.833490000  | -0.726894000 | 5.022432000  |
| H | 1.203710000  | -2.873747000 | 2.476830000  |
| H | 2.527153000  | 1.173763000  | 2.294308000  |
| H | 1.187124000  | -2.776263000 | 4.938386000  |
| H | 2.495165000  | 1.300142000  | 4.778748000  |
| H | 1.826165000  | -0.682638000 | 6.106138000  |

**IPr-TS2<sup>Ph</sup>-B**  $i$ 1156 cm<sup>-1</sup> Etot = -1619.490911017558

|   |                 |                 |                 |
|---|-----------------|-----------------|-----------------|
| C | -0.400291000000 | -0.882176000000 | 0.433198000000  |
| C | 0.741083000000  | -1.119716000000 | -0.263321000000 |
| N | -1.464512000000 | -1.208772000000 | -0.381581000000 |
| C | -1.066168000000 | -1.648117000000 | -1.600964000000 |
| N | 0.288488000000  | -1.582748000000 | -1.507222000000 |
| H | -0.535768000000 | -0.515911000000 | 1.437691000000  |
| O | 4.256624000000  | -1.653424000000 | -1.143227000000 |
| C | 2.148990000000  | -0.887782000000 | 0.129022000000  |
| O | 2.547398000000  | 0.422611000000  | -0.331173000000 |
| H | 3.374514000000  | 0.266458000000  | -0.807892000000 |
| C | 5.212728000000  | -2.202181000000 | -0.295255000000 |
| H | 5.827569000000  | -1.439088000000 | 0.213464000000  |
| H | 4.764258000000  | -2.822010000000 | 0.498455000000  |

|   |                 |                 |                 |
|---|-----------------|-----------------|-----------------|
| H | 5.908156000000  | -2.853371000000 | -0.846849000000 |
| H | 3.227906000000  | -1.547811000000 | -0.561435000000 |
| C | -2.829748000000 | -1.102738000000 | 0.019970000000  |
| C | -3.533753000000 | 0.072252000000  | -0.271544000000 |
| C | -3.419278000000 | -2.172678000000 | 0.705052000000  |
| C | -4.863831000000 | 0.151825000000  | 0.133477000000  |
| C | -4.750220000000 | -2.043661000000 | 1.093181000000  |
| C | -5.468813000000 | -0.894248000000 | 0.809592000000  |
| H | -5.433113000000 | 1.049557000000  | -0.082535000000 |
| H | -5.231008000000 | -2.858021000000 | 1.624383000000  |
| C | 1.114754000000  | -2.047724000000 | -2.577417000000 |
| C | 1.497746000000  | -1.157715000000 | -3.588456000000 |
| C | 1.468389000000  | -3.402544000000 | -2.610015000000 |
| C | 2.254248000000  | -1.657889000000 | -4.645346000000 |
| C | 2.225561000000  | -3.855501000000 | -3.687053000000 |
| C | 2.617198000000  | -2.993340000000 | -4.696968000000 |
| H | 2.558505000000  | -0.991847000000 | -5.445053000000 |
| H | 2.508279000000  | -4.901576000000 | -3.737108000000 |
| C | 1.078758000000  | 0.296234000000  | -3.583291000000 |
| H | 0.703926000000  | 0.527458000000  | -2.584542000000 |
| C | 1.037240000000  | -4.380648000000 | -1.538263000000 |
| H | 0.519033000000  | -3.817965000000 | -0.759305000000 |
| C | -2.899382000000 | 1.238023000000  | -0.997936000000 |
| H | -1.860656000000 | 0.976089000000  | -1.208062000000 |
| C | -2.661178000000 | -3.440918000000 | 1.030826000000  |
| H | -1.662862000000 | -3.355258000000 | 0.597167000000  |
| H | 3.205493000000  | -3.363811000000 | -5.529725000000 |
| H | -6.505496000000 | -0.812945000000 | 1.118305000000  |
| C | 0.052172000000  | -5.406140000000 | -2.098305000000 |
| H | 0.520905000000  | -6.016046000000 | -2.875824000000 |
| H | -0.288741000000 | -6.077334000000 | -1.305251000000 |
| H | -0.823575000000 | -4.918076000000 | -2.532557000000 |
| C | 2.229499000000  | -5.077351000000 | -0.886168000000 |
| H | 2.927903000000  | -4.353836000000 | -0.459876000000 |
| H | 1.885807000000  | -5.734489000000 | -0.082799000000 |
| H | 2.775655000000  | -5.691871000000 | -1.606948000000 |
| C | -3.326594000000 | -4.667491000000 | 0.410122000000  |
| H | -3.421716000000 | -4.560678000000 | -0.673133000000 |
| H | -2.731400000000 | -5.561645000000 | 0.613480000000  |
| H | -4.325378000000 | -4.830591000000 | 0.823887000000  |
| C | -2.497053000000 | -3.614169000000 | 2.539938000000  |
| H | -3.467939000000 | -3.720994000000 | 3.031766000000  |
| H | -1.910914000000 | -4.511316000000 | 2.756202000000  |
| H | -1.984952000000 | -2.757141000000 | 2.984228000000  |
| C | -3.586558000000 | 1.500377000000  | -2.336678000000 |
| H | -3.084468000000 | 2.314916000000  | -2.865495000000 |

|   |                 |                 |                 |
|---|-----------------|-----------------|-----------------|
| H | -3.561876000000 | 0.613528000000  | -2.974415000000 |
| H | -4.632158000000 | 1.787434000000  | -2.195023000000 |
| C | -2.892789000000 | 2.496609000000  | -0.132095000000 |
| H | -3.909934000000 | 2.826993000000  | 0.095583000000  |
| H | -2.373158000000 | 2.324269000000  | 0.813602000000  |
| H | -2.386015000000 | 3.311360000000  | -0.655940000000 |
| C | 2.242568000000  | 1.242233000000  | -3.866127000000 |
| H | 3.070502000000  | 1.072069000000  | -3.174715000000 |
| H | 2.620489000000  | 1.125609000000  | -4.885194000000 |
| H | 1.913793000000  | 2.278930000000  | -3.755417000000 |
| C | -0.056719000000 | 0.532074000000  | -4.579726000000 |
| H | 0.273550000000  | 0.315616000000  | -5.600019000000 |
| H | -0.916716000000 | -0.103982000000 | -4.358519000000 |
| H | -0.383792000000 | 1.575096000000  | -4.545064000000 |
| C | 2.403384000000  | -1.070659000000 | 1.569385000000  |
| C | 1.919237000000  | -2.194151000000 | 2.267782000000  |
| C | 3.218337000000  | -0.186015000000 | 2.292641000000  |
| C | 2.235730000000  | -2.417615000000 | 3.595455000000  |
| C | 3.535667000000  | -0.412983000000 | 3.626497000000  |
| C | 3.051695000000  | -1.528981000000 | 4.294355000000  |
| H | 1.287731000000  | -2.907017000000 | 1.747239000000  |
| H | 3.605240000000  | 0.692275000000  | 1.790473000000  |
| H | 1.842688000000  | -3.298002000000 | 4.094885000000  |
| H | 4.168782000000  | 0.297704000000  | 4.149445000000  |
| H | 3.300125000000  | -1.705975000000 | 5.334784000000  |

**IPr-III<sup>Ph</sup>-B**

Etot = -1619.498142783356

|   |              |              |              |
|---|--------------|--------------|--------------|
| C | -0.409576000 | -0.903960000 | 0.537216000  |
| C | 0.776553000  | -1.094528000 | -0.139356000 |
| N | -1.439666000 | -1.239796000 | -0.331529000 |
| C | -1.003689000 | -1.639418000 | -1.536991000 |
| N | 0.356138000  | -1.547137000 | -1.409250000 |
| H | -0.606763000 | -0.654541000 | 1.564203000  |
| O | 1.947036000  | -3.228289000 | 2.219421000  |
| C | 2.137037000  | -0.938272000 | 0.278321000  |
| O | 3.119632000  | -1.508950000 | -0.551907000 |
| H | 3.240633000  | -2.433762000 | -0.315047000 |
| C | 1.881574000  | -2.872721000 | 3.583645000  |
| H | 1.910593000  | -3.792792000 | 4.171142000  |
| H | 2.728242000  | -2.245600000 | 3.886930000  |
| H | 0.953967000  | -2.340458000 | 3.826742000  |
| H | 1.948196000  | -2.406577000 | 1.682527000  |
| C | -2.813359000 | -1.164193000 | 0.039282000  |
| C | -3.509530000 | 0.032348000  | -0.172335000 |
| C | -3.420838000 | -2.284238000 | 0.620334000  |

|   |              |              |              |
|---|--------------|--------------|--------------|
| C | -4.850266000 | 0.081726000  | 0.201020000  |
| C | -4.763484000 | -2.186789000 | 0.977612000  |
| C | -5.474061000 | -1.016294000 | 0.769916000  |
| H | -5.414112000 | 0.994855000  | 0.042486000  |
| H | -5.258935000 | -3.041546000 | 1.425741000  |
| C | 1.179933000  | -1.807438000 | -2.548412000 |
| C | 1.509516000  | -3.130388000 | -2.869473000 |
| C | 1.580257000  | -0.733942000 | -3.352581000 |
| C | 2.260708000  | -3.358575000 | -4.019096000 |
| C | 2.336162000  | -1.009777000 | -4.488979000 |
| C | 2.676593000  | -2.309800000 | -4.823040000 |
| H | 2.523954000  | -4.375496000 | -4.290202000 |
| H | 2.657412000  | -0.192083000 | -5.125697000 |
| C | 1.063440000  | -4.302299000 | -2.021468000 |
| H | 0.609427000  | -3.900169000 | -1.113334000 |
| C | 1.210797000  | 0.698266000  | -3.032063000 |
| H | 0.629988000  | 0.694340000  | -2.107687000 |
| C | -2.853991000 | 1.246809000  | -0.792004000 |
| H | -1.809745000 | 0.995711000  | -0.988512000 |
| C | -2.668386000 | -3.574216000 | 0.862976000  |
| H | -1.643570000 | -3.431567000 | 0.514464000  |
| H | 3.262977000  | -2.507098000 | -5.714161000 |
| H | -6.519427000 | -0.959008000 | 1.054001000  |
| C | -0.001596000 | -5.124620000 | -2.746604000 |
| H | -0.863398000 | -4.507632000 | -3.010550000 |
| H | 0.401754000  | -5.557568000 | -3.666678000 |
| H | -0.348378000 | -5.945095000 | -2.112171000 |
| C | 2.230032000  | -5.194177000 | -1.601980000 |
| H | 2.702139000  | -5.670112000 | -2.465441000 |
| H | 2.999044000  | -4.630369000 | -1.068103000 |
| H | 1.874073000  | -5.988173000 | -0.940164000 |
| C | 0.331172000  | 1.301820000  | -4.125955000 |
| H | -0.573998000 | 0.708945000  | -4.278817000 |
| H | 0.031708000  | 2.317797000  | -3.854251000 |
| H | 0.865906000  | 1.354218000  | -5.078464000 |
| C | 2.449413000  | 1.560320000  | -2.794766000 |
| H | 2.155233000  | 2.575747000  | -2.515656000 |
| H | 3.067308000  | 1.151013000  | -1.992315000 |
| H | 3.064059000  | 1.627332000  | -3.696822000 |
| C | -2.608632000 | -3.913884000 | 2.351123000  |
| H | -2.018350000 | -4.820681000 | 2.507826000  |
| H | -2.148334000 | -3.105078000 | 2.923987000  |
| H | -3.608179000 | -4.090697000 | 2.757948000  |
| C | -3.270546000 | -4.728748000 | 0.064300000  |
| H | -3.282744000 | -4.505334000 | -1.005220000 |
| H | -2.684998000 | -5.639479000 | 0.216042000  |

|   |              |              |              |
|---|--------------|--------------|--------------|
| H | -4.297212000 | -4.934951000 | 0.379291000  |
| C | -2.871948000 | 2.440239000  | 0.161286000  |
| H | -3.894901000 | 2.757384000  | 0.382134000  |
| H | -2.380540000 | 2.198823000  | 1.107000000  |
| H | -2.348825000 | 3.288900000  | -0.287410000 |
| C | -3.501364000 | 1.607090000  | -2.127966000 |
| H | -3.458401000 | 0.768354000  | -2.826988000 |
| H | -4.550587000 | 1.886004000  | -1.996709000 |
| H | -2.983612000 | 2.456334000  | -2.581927000 |
| C | 2.607634000  | -0.039801000 | 1.266874000  |
| C | 1.778087000  | 0.814241000  | 2.052967000  |
| C | 4.006265000  | 0.069272000  | 1.534069000  |
| C | 2.301663000  | 1.668647000  | 3.005909000  |
| C | 4.507579000  | 0.923247000  | 2.496468000  |
| C | 3.670645000  | 1.738693000  | 3.259674000  |
| H | 0.708513000  | 0.820405000  | 1.892848000  |
| H | 4.690692000  | -0.538863000 | 0.955867000  |
| H | 1.617696000  | 2.300125000  | 3.566847000  |
| H | 5.582327000  | 0.956637000  | 2.654952000  |
| H | 4.069466000  | 2.402467000  | 4.017862000  |

**IPr-TS1<sup>iPr</sup>-A**  $i128\text{ cm}^{-1}$  Etot = -1506.982979887359

|   |                 |                 |                 |
|---|-----------------|-----------------|-----------------|
| H | -1.318603000000 | 4.084512000000  | 0.218570000000  |
| C | -2.210053000000 | 2.182963000000  | 0.908549000000  |
| C | -1.347737000000 | 3.009733000000  | 0.285488000000  |
| N | -1.768150000000 | 0.899029000000  | 0.651813000000  |
| C | -0.653056000000 | 0.887353000000  | -0.116661000000 |
| N | -0.408857000000 | 2.202357000000  | -0.329596000000 |
| H | -3.085182000000 | 2.385870000000  | 1.503260000000  |
| H | 2.588172000000  | -1.108585000000 | 1.527654000000  |
| O | 3.139220000000  | -1.378084000000 | 2.296036000000  |
| C | 0.614168000000  | -0.999088000000 | -0.244693000000 |
| O | 1.784138000000  | -0.721009000000 | 0.055915000000  |
| C | 0.636205000000  | 2.729357000000  | -1.157681000000 |
| C | 1.888656000000  | 2.992383000000  | -0.587936000000 |
| C | 0.344469000000  | 3.008977000000  | -2.498778000000 |
| C | 2.871448000000  | 3.528002000000  | -1.415497000000 |
| C | 1.362009000000  | 3.548340000000  | -3.281749000000 |
| C | 2.613835000000  | 3.801123000000  | -2.748822000000 |
| H | 3.852843000000  | 3.741242000000  | -1.009060000000 |
| H | 1.168303000000  | 3.777296000000  | -4.323502000000 |
| C | -2.448275000000 | -0.265453000000 | 1.137792000000  |
| C | -3.394550000000 | -0.888345000000 | 0.313054000000  |
| C | -2.175092000000 | -0.709045000000 | 2.437141000000  |
| C | -4.066801000000 | -1.994134000000 | 0.825845000000  |
| C | -2.878340000000 | -1.816854000000 | 2.903118000000  |

|   |                 |                 |                 |
|---|-----------------|-----------------|-----------------|
| C | -3.813242000000 | -2.455099000000 | 2.106971000000  |
| H | -4.807008000000 | -2.497982000000 | 0.215334000000  |
| H | -2.690833000000 | -2.183070000000 | 3.906105000000  |
| C | 2.161829000000  | 2.769187000000  | 0.883999000000  |
| H | 1.455560000000  | 2.016267000000  | 1.242041000000  |
| C | -1.178926000000 | -0.014149000000 | 3.339685000000  |
| H | -0.616689000000 | 0.701645000000  | 2.735491000000  |
| C | -3.737940000000 | -0.360891000000 | -1.063456000000 |
| H | -2.918687000000 | 0.284414000000  | -1.388890000000 |
| C | -1.032431000000 | 2.796920000000  | -3.092405000000 |
| H | -1.608600000000 | 2.180748000000  | -2.398598000000 |
| H | -0.074659000000 | -1.359837000000 | 0.535898000000  |
| C | 4.360166000000  | -1.874983000000 | 1.799313000000  |
| H | 4.925706000000  | -1.110980000000 | 1.250418000000  |
| H | 4.967096000000  | -2.199595000000 | 2.647380000000  |
| H | 4.216801000000  | -2.736746000000 | 1.135227000000  |
| H | 3.394254000000  | 4.219516000000  | -3.375164000000 |
| H | -4.350599000000 | -3.316833000000 | 2.487751000000  |
| C | 3.567115000000  | 2.246715000000  | 1.162174000000  |
| H | 3.659673000000  | 1.990391000000  | 2.220282000000  |
| H | 3.784895000000  | 1.351642000000  | 0.576553000000  |
| H | 4.329879000000  | 2.997525000000  | 0.941006000000  |
| C | 1.913333000000  | 4.059237000000  | 1.669321000000  |
| H | 0.894952000000  | 4.428277000000  | 1.530702000000  |
| H | 2.071436000000  | 3.888512000000  | 2.737499000000  |
| H | 2.604363000000  | 4.842706000000  | 1.344863000000  |
| C | -1.900692000000 | 0.768715000000  | 4.436980000000  |
| H | -2.593013000000 | 1.501915000000  | 4.016625000000  |
| H | -2.471842000000 | 0.094290000000  | 5.081202000000  |
| H | -1.177329000000 | 1.299998000000  | 5.060970000000  |
| C | -0.172810000000 | -0.988724000000 | 3.945708000000  |
| H | -0.657222000000 | -1.697322000000 | 4.622208000000  |
| H | 0.348017000000  | -1.557126000000 | 3.172264000000  |
| H | 0.574728000000  | -0.439221000000 | 4.523230000000  |
| C | -5.006826000000 | 0.491873000000  | -1.002389000000 |
| H | -5.230100000000 | 0.910711000000  | -1.987218000000 |
| H | -5.861749000000 | -0.114601000000 | -0.689717000000 |
| H | -4.901882000000 | 1.318344000000  | -0.295960000000 |
| C | -3.888216000000 | -1.465770000000 | -2.104776000000 |
| H | -3.004843000000 | -2.107328000000 | -2.140863000000 |
| H | -4.757630000000 | -2.096496000000 | -1.903663000000 |
| H | -4.028005000000 | -1.022715000000 | -3.093883000000 |
| C | -0.996196000000 | 2.062462000000  | -4.429849000000 |
| H | -0.493411000000 | 2.652174000000  | -5.200297000000 |
| H | -0.482898000000 | 1.102653000000  | -4.347087000000 |
| H | -2.016299000000 | 1.874574000000  | -4.774223000000 |

|   |                 |                 |                 |
|---|-----------------|-----------------|-----------------|
| C | -1.758041000000 | 4.135621000000  | -3.240178000000 |
| H | -1.227158000000 | 4.785348000000  | -3.941808000000 |
| H | -2.769390000000 | 3.977999000000  | -3.624046000000 |
| H | -1.832949000000 | 4.659954000000  | -2.284913000000 |
| C | 0.252361000000  | -1.476005000000 | -1.635671000000 |
| H | -0.794735000000 | -1.218813000000 | -1.810936000000 |
| C | 0.374567000000  | -3.002435000000 | -1.631514000000 |
| H | 0.055980000000  | -3.407726000000 | -2.595060000000 |
| H | 1.409847000000  | -3.310745000000 | -1.460623000000 |
| H | -0.248717000000 | -3.453340000000 | -0.854416000000 |
| C | 1.123414000000  | -0.855535000000 | -2.710487000000 |
| H | 2.171362000000  | -1.126801000000 | -2.562595000000 |
| H | 0.819422000000  | -1.206227000000 | -3.699817000000 |
| H | 1.054309000000  | 0.234024000000  | -2.694699000000 |

**IPr-II<sup>iPr</sup>-A**

Etot = -1507.011145701613

|   |                 |                 |                 |
|---|-----------------|-----------------|-----------------|
| C | -0.367164000000 | -0.351425000000 | 0.018043000000  |
| C | -1.162642000000 | -2.070756000000 | -1.162140000000 |
| H | -1.911002000000 | -2.665017000000 | -1.657228000000 |
| C | 0.161700000000  | -2.257921000000 | -1.007667000000 |
| H | 0.810441000000  | -3.048507000000 | -1.344081000000 |
| N | -1.474816000000 | -0.887544000000 | -0.527461000000 |
| N | 0.643039000000  | -1.191366000000 | -0.279686000000 |
| C | 2.037496000000  | -1.089034000000 | 0.072586000000  |
| C | 2.913803000000  | -0.496389000000 | -0.844907000000 |
| C | 2.471671000000  | -1.683874000000 | 1.263060000000  |
| C | 4.262595000000  | -0.450111000000 | -0.502671000000 |
| C | 3.830863000000  | -1.609055000000 | 1.553393000000  |
| C | 4.716212000000  | -0.989121000000 | 0.688411000000  |
| H | 4.969053000000  | 0.005745000000  | -1.186287000000 |
| H | 4.202623000000  | -2.055604000000 | 2.468201000000  |
| C | -2.815922000000 | -0.364586000000 | -0.481569000000 |
| C | -3.601234000000 | -0.641787000000 | 0.645164000000  |
| C | -3.302339000000 | 0.326201000000  | -1.597910000000 |
| C | -4.906218000000 | -0.159685000000 | 0.646493000000  |
| C | -4.617038000000 | 0.782373000000  | -1.542099000000 |
| C | -5.408237000000 | 0.550154000000  | -0.431419000000 |
| H | -5.542685000000 | -0.349957000000 | 1.502184000000  |
| H | -5.027537000000 | 1.323079000000  | -2.386773000000 |
| C | -2.489459000000 | 0.534328000000  | -2.857976000000 |
| H | -1.441734000000 | 0.325035000000  | -2.628823000000 |
| C | -3.096689000000 | -1.488006000000 | 1.794009000000  |
| H | -2.005094000000 | -1.437746000000 | 1.798477000000  |
| C | 2.464024000000  | 0.017251000000  | -2.195993000000 |
| H | 1.376559000000  | 0.119277000000  | -2.179764000000 |

|   |                 |                 |                 |
|---|-----------------|-----------------|-----------------|
| C | 1.546370000000  | -2.457939000000 | 2.174426000000  |
| H | 0.522355000000  | -2.193319000000 | 1.909374000000  |
| C | -0.346823000000 | 0.831767000000  | 0.980164000000  |
| O | -0.031094000000 | 0.332199000000  | 2.199299000000  |
| H | -0.332044000000 | 0.984023000000  | 3.573483000000  |
| O | -0.446140000000 | 1.251473000000  | 4.546857000000  |
| C | -1.365519000000 | 2.303043000000  | 4.651659000000  |
| H | -1.632041000000 | 2.438568000000  | 5.704398000000  |
| H | -0.959171000000 | 3.257155000000  | 4.286296000000  |
| H | -2.294855000000 | 2.106992000000  | 4.098949000000  |
| H | -1.384278000000 | 1.231538000000  | 0.920351000000  |
| H | -6.428640000000 | 0.916751000000  | -0.408660000000 |
| H | 5.770996000000  | -0.941442000000 | 0.936291000000  |
| C | -3.568747000000 | -0.989035000000 | 3.155359000000  |
| H | -3.070476000000 | -1.555876000000 | 3.945341000000  |
| H | -3.335696000000 | 0.068151000000  | 3.297130000000  |
| H | -4.645327000000 | -1.122461000000 | 3.286863000000  |
| C | -3.509856000000 | -2.947551000000 | 1.590667000000  |
| H | -3.132075000000 | -3.349488000000 | 0.648012000000  |
| H | -3.122783000000 | -3.566385000000 | 2.404373000000  |
| H | -4.599849000000 | -3.038589000000 | 1.584424000000  |
| C | -2.933577000000 | -0.447313000000 | -3.944897000000 |
| H | -2.845069000000 | -1.485338000000 | -3.617937000000 |
| H | -3.976984000000 | -0.267751000000 | -4.218475000000 |
| H | -2.321381000000 | -0.318103000000 | -4.841084000000 |
| C | -2.567881000000 | 1.965497000000  | -3.383297000000 |
| H | -3.568261000000 | 2.201383000000  | -3.754045000000 |
| H | -2.309310000000 | 2.693690000000  | -2.613100000000 |
| H | -1.871685000000 | 2.088518000000  | -4.216595000000 |
| C | 2.814682000000  | -0.995467000000 | -3.288770000000 |
| H | 3.898050000000  | -1.129843000000 | -3.352471000000 |
| H | 2.364112000000  | -1.971602000000 | -3.096840000000 |
| H | 2.459266000000  | -0.640085000000 | -4.259412000000 |
| C | 3.049069000000  | 1.384248000000  | -2.538920000000 |
| H | 2.857101000000  | 2.114937000000  | -1.751045000000 |
| H | 4.128845000000  | 1.329491000000  | -2.696968000000 |
| H | 2.600351000000  | 1.754083000000  | -3.464115000000 |
| C | 1.726611000000  | -2.095003000000 | 3.644059000000  |
| H | 0.993763000000  | -2.636384000000 | 4.248206000000  |
| H | 2.719117000000  | -2.364266000000 | 4.014005000000  |
| H | 1.568605000000  | -1.026143000000 | 3.790578000000  |
| C | 1.734289000000  | -3.960965000000 | 1.958245000000  |
| H | 2.745399000000  | -4.270323000000 | 2.238250000000  |
| H | 1.026668000000  | -4.521214000000 | 2.575186000000  |
| H | 1.573338000000  | -4.242843000000 | 0.914834000000  |
| C | 0.552706000000  | 1.990187000000  | 0.485997000000  |

|   |                 |                |                 |
|---|-----------------|----------------|-----------------|
| H | 1.561769000000  | 1.591068000000 | 0.331850000000  |
| C | 0.042766000000  | 2.593549000000 | -0.812207000000 |
| H | 0.690545000000  | 3.408267000000 | -1.145156000000 |
| H | -0.009087000000 | 1.863633000000 | -1.623304000000 |
| H | -0.960958000000 | 3.006406000000 | -0.669643000000 |
| C | 0.629064000000  | 3.060924000000 | 1.562669000000  |
| H | -0.361599000000 | 3.490711000000 | 1.747668000000  |
| H | 0.999611000000  | 2.653426000000 | 2.503433000000  |
| H | 1.291069000000  | 3.872608000000 | 1.248660000000  |

**IPr-TS2<sup>iPr</sup>-A**       $i1316\text{ cm}^{-1}$       Etot = -1506.971313765101

|   |                 |                 |                 |
|---|-----------------|-----------------|-----------------|
| C | -0.361649000000 | -0.070380000000 | 0.020819000000  |
| C | -1.168471000000 | -2.073801000000 | -0.604178000000 |
| H | -1.929138000000 | -2.806571000000 | -0.810291000000 |
| C | 0.167604000000  | -2.149292000000 | -0.658811000000 |
| H | 0.822189000000  | -2.956597000000 | -0.937731000000 |
| N | -1.496564000000 | -0.794446000000 | -0.187782000000 |
| N | 0.666939000000  | -0.916340000000 | -0.279589000000 |
| C | 2.082467000000  | -0.668076000000 | -0.307774000000 |
| C | 2.860959000000  | -1.109391000000 | 0.770612000000  |
| C | 2.643401000000  | -0.099999000000 | -1.459805000000 |
| C | 4.238866000000  | -0.930284000000 | 0.686904000000  |
| C | 4.025324000000  | 0.065965000000  | -1.484846000000 |
| C | 4.815983000000  | -0.340315000000 | -0.423419000000 |
| H | 4.868430000000  | -1.260809000000 | 1.504848000000  |
| H | 4.492418000000  | 0.507249000000  | -2.356752000000 |
| C | -2.882416000000 | -0.459436000000 | 0.018007000000  |
| C | -3.463061000000 | -0.755848000000 | 1.255109000000  |
| C | -3.627066000000 | 0.014576000000  | -1.069310000000 |
| C | -4.829679000000 | -0.529362000000 | 1.397912000000  |
| C | -4.988537000000 | 0.224176000000  | -0.872561000000 |
| C | -5.586514000000 | -0.040222000000 | 0.348373000000  |
| H | -5.308185000000 | -0.747066000000 | 2.346044000000  |
| H | -5.593055000000 | 0.595489000000  | -1.691478000000 |
| C | -3.010375000000 | 0.258408000000  | -2.430351000000 |
| H | -1.935110000000 | 0.398180000000  | -2.293259000000 |
| C | -2.679531000000 | -1.340946000000 | 2.409939000000  |
| H | -1.616182000000 | -1.278148000000 | 2.168034000000  |
| C | 2.266666000000  | -1.793402000000 | 1.983082000000  |
| H | 1.186401000000  | -1.628923000000 | 1.969931000000  |
| C | 1.812180000000  | 0.248493000000  | -2.675544000000 |
| H | 0.790338000000  | 0.446171000000  | -2.343928000000 |
| C | -0.263790000000 | 1.338987000000  | 0.353894000000  |
| O | -1.544219000000 | 1.883446000000  | 0.645575000000  |
| H | -1.713042000000 | 2.459595000000  | -0.119818000000 |

|   |                 |                 |                 |
|---|-----------------|-----------------|-----------------|
| H | -0.107176000000 | 2.048977000000  | -0.786409000000 |
| O | -0.550697000000 | 2.804690000000  | -1.707306000000 |
| C | -0.023154000000 | 4.084027000000  | -1.793933000000 |
| H | -0.355843000000 | 4.751979000000  | -0.980191000000 |
| H | 1.080549000000  | 4.102542000000  | -1.777805000000 |
| H | -0.324690000000 | 4.567277000000  | -2.737076000000 |
| C | -3.023944000000 | -2.819040000000 | 2.599971000000  |
| H | -2.428506000000 | -3.245559000000 | 3.411502000000  |
| H | -4.080167000000 | -2.938896000000 | 2.856993000000  |
| H | -2.829036000000 | -3.396602000000 | 1.693437000000  |
| C | -2.900181000000 | -0.570294000000 | 3.709153000000  |
| H | -2.245841000000 | -0.964950000000 | 4.490554000000  |
| H | -2.681327000000 | 0.492134000000  | 3.586459000000  |
| H | -3.929965000000 | -0.667884000000 | 4.061707000000  |
| C | -3.545547000000 | 1.517288000000  | -3.106109000000 |
| H | -4.594216000000 | 1.407508000000  | -3.393585000000 |
| H | -3.454951000000 | 2.389345000000  | -2.456076000000 |
| H | -2.975638000000 | 1.713906000000  | -4.017339000000 |
| C | -3.220879000000 | -0.951507000000 | -3.343677000000 |
| H | -4.288271000000 | -1.118657000000 | -3.514736000000 |
| H | -2.745653000000 | -0.779263000000 | -4.313121000000 |
| H | -2.800693000000 | -1.864525000000 | -2.917804000000 |
| C | 2.298656000000  | 1.500747000000  | -3.395772000000 |
| H | 2.381532000000  | 2.349520000000  | -2.714589000000 |
| H | 3.269445000000  | 1.343545000000  | -3.872489000000 |
| H | 1.588869000000  | 1.767589000000  | -4.182098000000 |
| C | 2.509902000000  | -3.302731000000 | 1.923647000000  |
| H | 2.047929000000  | -3.792464000000 | 2.784764000000  |
| H | 2.094907000000  | -3.746584000000 | 1.016473000000  |
| H | 3.581663000000  | -3.519120000000 | 1.946009000000  |
| C | 2.803922000000  | -1.226785000000 | 3.294936000000  |
| H | 2.683950000000  | -0.143228000000 | 3.344709000000  |
| H | 2.263858000000  | -1.668603000000 | 4.135909000000  |
| H | 3.863464000000  | -1.458932000000 | 3.426764000000  |
| H | -6.649823000000 | 0.129014000000  | 0.478804000000  |
| H | 5.891179000000  | -0.205373000000 | -0.467616000000 |
| C | 1.777836000000  | -0.934371000000 | -3.646834000000 |
| H | 2.783299000000  | -1.151678000000 | -4.018714000000 |
| H | 1.388908000000  | -1.839179000000 | -3.175725000000 |
| H | 1.142482000000  | -0.698097000000 | -4.504529000000 |
| C | 0.751018000000  | 1.722526000000  | 1.433728000000  |
| H | 1.663320000000  | 1.148521000000  | 1.255642000000  |
| C | 0.249819000000  | 1.391724000000  | 2.837703000000  |
| H | -0.658611000000 | 1.954611000000  | 3.063476000000  |
| H | 0.023983000000  | 0.328554000000  | 2.948968000000  |
| H | 1.001865000000  | 1.656554000000  | 3.586117000000  |

|   |                |                |                |
|---|----------------|----------------|----------------|
| C | 1.121377000000 | 3.198068000000 | 1.351188000000 |
| H | 1.808522000000 | 3.463995000000 | 2.159147000000 |
| H | 1.601501000000 | 3.439068000000 | 0.401187000000 |
| H | 0.232347000000 | 3.827225000000 | 1.448965000000 |

**IPr-III<sup>iPr</sup>-A**

Etot = -1506.991808116759

|   |                 |                 |                 |
|---|-----------------|-----------------|-----------------|
| C | -0.253468000000 | -0.273069000000 | -0.021220000000 |
| C | -1.134837000000 | -2.172832000000 | -0.928250000000 |
| H | -1.915019000000 | -2.854659000000 | -1.221810000000 |
| C | 0.183974000000  | -2.224642000000 | -1.123865000000 |
| H | 0.795526000000  | -2.978506000000 | -1.589794000000 |
| N | -1.432844000000 | -0.992252000000 | -0.247058000000 |
| N | 0.756508000000  | -1.071033000000 | -0.579864000000 |
| C | 2.143166000000  | -1.043982000000 | -0.247488000000 |
| C | 3.050403000000  | -0.502781000000 | -1.171179000000 |
| C | 2.573027000000  | -1.622053000000 | 0.956593000000  |
| C | 4.405684000000  | -0.535213000000 | -0.856871000000 |
| C | 3.938400000000  | -1.620819000000 | 1.231552000000  |
| C | 4.847315000000  | -1.081791000000 | 0.336990000000  |
| H | 5.127111000000  | -0.127398000000 | -1.555841000000 |
| H | 4.296711000000  | -2.065247000000 | 2.153737000000  |
| C | -2.776724000000 | -0.531442000000 | -0.129894000000 |
| C | -3.556385000000 | -0.989863000000 | 0.941412000000  |
| C | -3.310494000000 | 0.298422000000  | -1.125985000000 |
| C | -4.887598000000 | -0.588413000000 | 1.004499000000  |
| C | -4.644332000000 | 0.682936000000  | -1.014305000000 |
| C | -5.428339000000 | 0.245821000000  | 0.040171000000  |
| H | -5.510787000000 | -0.933627000000 | 1.822294000000  |
| H | -5.079816000000 | 1.323715000000  | -1.773322000000 |
| C | -2.500670000000 | 0.737407000000  | -2.327021000000 |
| H | -1.457955000000 | 0.469290000000  | -2.145407000000 |
| C | -2.995183000000 | -1.913484000000 | 1.999987000000  |
| H | -1.912970000000 | -1.954988000000 | 1.856890000000  |
| C | 2.583815000000  | 0.074975000000  | -2.489460000000 |
| H | 1.508759000000  | 0.252241000000  | -2.402136000000 |
| C | 1.615912000000  | -2.303215000000 | 1.911605000000  |
| H | 0.598231000000  | -2.067773000000 | 1.594245000000  |
| C | -0.130724000000 | 0.931455000000  | 0.599730000000  |
| O | -1.265737000000 | 1.423597000000  | 1.264210000000  |
| H | -1.409157000000 | 1.774532000000  | 3.055912000000  |
| O | -1.538142000000 | 1.988385000000  | 3.997816000000  |
| C | -2.435142000000 | 3.074634000000  | 4.079426000000  |
| H | -2.569111000000 | 3.321416000000  | 5.134180000000  |
| H | -2.051153000000 | 3.964878000000  | 3.566623000000  |
| H | -3.417847000000 | 2.830154000000  | 3.658019000000  |

|   |                 |                 |                 |
|---|-----------------|-----------------|-----------------|
| H | -1.724713000000 | 2.068064000000  | 0.712868000000  |
| H | -6.467049000000 | 0.551297000000  | 0.106958000000  |
| H | 5.907288000000  | -1.095640000000 | 0.567069000000  |
| C | 1.784537000000  | -3.821844000000 | 1.836268000000  |
| H | 1.057145000000  | -4.316137000000 | 2.485855000000  |
| H | 1.638232000000  | -4.189475000000 | 0.818063000000  |
| H | 2.785516000000  | -4.117059000000 | 2.163684000000  |
| C | 1.768607000000  | -1.823050000000 | 3.351998000000  |
| H | 1.620603000000  | -0.744398000000 | 3.432602000000  |
| H | 1.026747000000  | -2.314682000000 | 3.986661000000  |
| H | 2.756531000000  | -2.061994000000 | 3.754054000000  |
| C | -3.255648000000 | -1.403415000000 | 3.415010000000  |
| H | -4.323832000000 | -1.390717000000 | 3.647282000000  |
| H | -2.769352000000 | -2.059557000000 | 4.141795000000  |
| H | -2.865037000000 | -0.392995000000 | 3.554380000000  |
| C | -3.542464000000 | -3.331008000000 | 1.830864000000  |
| H | -3.322129000000 | -3.729926000000 | 0.837874000000  |
| H | -3.100452000000 | -4.000804000000 | 2.573467000000  |
| H | -4.627796000000 | -3.345630000000 | 1.967215000000  |
| C | -2.958323000000 | -0.006194000000 | -3.582507000000 |
| H | -2.881717000000 | -1.088511000000 | -3.453954000000 |
| H | -3.999015000000 | 0.234380000000  | -3.818129000000 |
| H | -2.343204000000 | 0.280387000000  | -4.439788000000 |
| C | -2.553997000000 | 2.246889000000  | -2.548018000000 |
| H | -1.898228000000 | 2.526353000000  | -3.376657000000 |
| H | -3.563864000000 | 2.580587000000  | -2.799881000000 |
| H | -2.228677000000 | 2.793853000000  | -1.659948000000 |
| C | 2.798652000000  | -0.930144000000 | -3.622037000000 |
| H | 2.423500000000  | -0.526035000000 | -4.566160000000 |
| H | 3.863712000000  | -1.147018000000 | -3.746005000000 |
| H | 2.282879000000  | -1.872779000000 | -3.425414000000 |
| C | 3.250350000000  | 1.406221000000  | -2.824371000000 |
| H | 3.127237000000  | 2.131535000000  | -2.016823000000 |
| H | 4.320329000000  | 1.287301000000  | -3.013062000000 |
| H | 2.803305000000  | 1.826053000000  | -3.729036000000 |
| C | 1.053696000000  | 1.850775000000  | 0.592723000000  |
| H | 1.858132000000  | 1.351779000000  | 0.051060000000  |
| C | 1.571792000000  | 2.176070000000  | 1.993991000000  |
| H | 0.793215000000  | 2.650158000000  | 2.597080000000  |
| H | 1.898497000000  | 1.273225000000  | 2.513916000000  |
| H | 2.419494000000  | 2.865518000000  | 1.942565000000  |
| C | 0.740754000000  | 3.150171000000  | -0.158541000000 |
| H | 1.618257000000  | 3.802692000000  | -0.181528000000 |
| H | 0.436501000000  | 2.948870000000  | -1.188576000000 |
| H | -0.064460000000 | 3.706120000000  | 0.331831000000  |

**IPr-TS1<sup>iPr</sup>-B**       $i208\text{ cm}^{-1}$       Etot = -1506.462981512803

|   |                 |                 |                 |
|---|-----------------|-----------------|-----------------|
| C | -0.301571000000 | -0.729291000000 | 0.209484000000  |
| C | 0.761978000000  | -1.101250000000 | -0.547029000000 |
| N | -1.462525000000 | -1.041247000000 | -0.495916000000 |
| C | -1.194432000000 | -1.601670000000 | -1.697449000000 |
| N | 0.170604000000  | -1.621826000000 | -1.699153000000 |
| H | -0.351560000000 | -0.278364000000 | 1.187907000000  |
| O | 5.353840000000  | 1.678674000000  | -0.885268000000 |
| C | 2.835813000000  | -0.914756000000 | -0.366673000000 |
| O | 3.256085000000  | 0.110197000000  | -1.005728000000 |
| C | 6.393226000000  | 1.019755000000  | -1.563998000000 |
| H | 6.099773000000  | 0.712371000000  | -2.576444000000 |
| H | 7.239979000000  | 1.705013000000  | -1.654638000000 |
| H | 6.741112000000  | 0.126168000000  | -1.027599000000 |
| H | 4.566412000000  | 1.073452000000  | -0.872241000000 |
| C | -2.777074000000 | -0.780447000000 | -0.011203000000 |
| C | -3.366651000000 | 0.461376000000  | -0.283723000000 |
| C | -3.434253000000 | -1.760472000000 | 0.744008000000  |
| C | -4.644912000000 | 0.702416000000  | 0.213122000000  |
| C | -4.712429000000 | -1.474324000000 | 1.217114000000  |
| C | -5.315151000000 | -0.255245000000 | 0.955936000000  |
| H | -5.122172000000 | 1.656185000000  | 0.014702000000  |
| H | -5.243035000000 | -2.219587000000 | 1.800093000000  |
| C | 0.909677000000  | -2.163959000000 | -2.794095000000 |
| C | 1.363213000000  | -3.488267000000 | -2.718365000000 |
| C | 1.149814000000  | -1.368289000000 | -3.922599000000 |
| C | 2.069619000000  | -4.004560000000 | -3.801501000000 |
| C | 1.858745000000  | -1.929830000000 | -4.982452000000 |
| C | 2.318263000000  | -3.234455000000 | -4.925393000000 |
| H | 2.423908000000  | -5.029190000000 | -3.767025000000 |
| H | 2.050812000000  | -1.334493000000 | -5.868663000000 |
| C | 1.065613000000  | -4.374571000000 | -1.527709000000 |
| H | 0.639326000000  | -3.745252000000 | -0.743986000000 |
| C | 0.639105000000  | 0.052097000000  | -4.037327000000 |
| H | 0.217922000000  | 0.331834000000  | -3.069652000000 |
| C | -2.659553000000 | 1.530396000000  | -1.087921000000 |
| H | -1.698764000000 | 1.123583000000  | -1.409455000000 |
| C | -2.803234000000 | -3.100364000000 | 1.052918000000  |
| H | -1.809379000000 | -3.111793000000 | 0.601104000000  |
| H | 2.868893000000  | -3.653850000000 | -5.760710000000 |
| H | -6.310952000000 | -0.049993000000 | 1.334034000000  |
| C | 0.024284000000  | -5.432718000000 | -1.893146000000 |
| H | -0.900098000000 | -4.972590000000 | -2.250502000000 |
| H | 0.400684000000  | -6.093058000000 | -2.679850000000 |
| H | -0.214214000000 | -6.049009000000 | -1.021907000000 |

|   |                 |                 |                 |
|---|-----------------|-----------------|-----------------|
| C | 2.321199000000  | -5.030908000000 | -0.959026000000 |
| H | 2.773544000000  | -5.722574000000 | -1.674677000000 |
| H | 3.072478000000  | -4.285451000000 | -0.687383000000 |
| H | 2.070033000000  | -5.602815000000 | -0.061798000000 |
| C | -0.480750000000 | 0.141933000000  | -5.074210000000 |
| H | -1.299145000000 | -0.540455000000 | -4.833655000000 |
| H | -0.881997000000 | 1.158409000000  | -5.113987000000 |
| H | -0.108678000000 | -0.111932000000 | -6.071111000000 |
| C | 1.752365000000  | 1.045019000000  | -4.364289000000 |
| H | 1.349383000000  | 2.061122000000  | -4.390616000000 |
| H | 2.545393000000  | 1.012514000000  | -3.614092000000 |
| H | 2.197482000000  | 0.841507000000  | -5.341925000000 |
| C | -2.630840000000 | -3.303140000000 | 2.557137000000  |
| H | -2.126731000000 | -4.252955000000 | 2.754499000000  |
| H | -2.033190000000 | -2.502168000000 | 2.999203000000  |
| H | -3.597337000000 | -3.325496000000 | 3.068099000000  |
| C | -3.604690000000 | -4.246011000000 | 0.437412000000  |
| H | -3.691918000000 | -4.130484000000 | -0.645645000000 |
| H | -3.116326000000 | -5.202695000000 | 0.640909000000  |
| H | -4.614088000000 | -4.290622000000 | 0.855719000000  |
| C | -2.379612000000 | 2.768694000000  | -0.237970000000 |
| H | -3.310301000000 | 3.229886000000  | 0.104274000000  |
| H | -1.782369000000 | 2.518710000000  | 0.642317000000  |
| H | -1.831531000000 | 3.513054000000  | -0.821729000000 |
| C | -3.445721000000 | 1.898920000000  | -2.344611000000 |
| H | -3.633305000000 | 1.019749000000  | -2.965723000000 |
| H | -4.410536000000 | 2.347955000000  | -2.093511000000 |
| H | -2.885518000000 | 2.624567000000  | -2.940336000000 |
| C | 3.025605000000  | -0.993778000000 | 1.144644000000  |
| H | 2.381408000000  | -1.800473000000 | 1.509387000000  |
| C | 4.476165000000  | -1.382522000000 | 1.432138000000  |
| H | 4.645006000000  | -1.483899000000 | 2.508075000000  |
| H | 4.734440000000  | -2.335222000000 | 0.960668000000  |
| H | 5.163164000000  | -0.619432000000 | 1.055236000000  |
| C | 2.665858000000  | 0.299693000000  | 1.859180000000  |
| H | 3.418258000000  | 1.067005000000  | 1.661789000000  |
| H | 1.698294000000  | 0.685471000000  | 1.532941000000  |
| H | 2.626690000000  | 0.145678000000  | 2.940978000000  |
| H | 3.004639000000  | -1.903369000000 | -0.830484000000 |

**IPr-II<sup>iPr</sup>-B**

Etot = -1506.508787655964

|   |                 |                 |                 |
|---|-----------------|-----------------|-----------------|
| C | -0.689608000000 | -0.592241000000 | 0.645155000000  |
| C | 0.504731000000  | -0.989591000000 | 0.147784000000  |
| N | -1.663483000000 | -1.000879000000 | -0.248948000000 |
| C | -1.147414000000 | -1.655151000000 | -1.316128000000 |

|   |                |                |                |
|---|----------------|----------------|----------------|
| N | 0.18824000000  | -1.63034100000 | -1.05188100000 |
| H | -0.93214100000 | -0.06466500000 | 1.55282300000  |
| O | 1.31249300000  | 2.48665100000  | -0.18898200000 |
| C | 1.91551800000  | -0.75956000000 | 0.64594200000  |
| O | 2.50219900000  | 0.29883200000  | -0.00056200000 |
| H | 1.77677900000  | 1.55020900000  | -0.08094700000 |
| C | 2.19098200000  | 3.47639500000  | 0.25828000000  |
| H | 2.53014800000  | 3.30542200000  | 1.29187900000  |
| H | 3.09234400000  | 3.56094100000  | -0.36916100000 |
| H | 1.68999800000  | 4.45068000000  | 0.23813000000  |
| H | 2.46826300000  | -1.70183200000 | 0.43090600000  |
| C | -3.05693900000 | -0.76405300000 | -0.05186700000 |
| C | -3.61746900000 | 0.42422900000  | -0.53690300000 |
| C | -3.81620000000 | -1.71726000000 | 0.63826800000  |
| C | -4.97553500000 | 0.64057600000  | -0.31815200000 |
| C | -5.17065900000 | -1.45667500000 | 0.82984400000  |
| C | -5.74731100000 | -0.28933400000 | 0.35816600000  |
| H | -5.43465400000 | 1.55288600000  | -0.68343700000 |
| H | -5.78187400000 | -2.17995800000 | 1.35896100000  |
| C | 1.13312700000  | -2.23546500000 | -1.93895500000 |
| C | 1.53588500000  | -1.53860600000 | -3.08687900000 |
| C | 1.59485300000  | -3.52884100000 | -1.65914700000 |
| C | 2.41947200000  | -2.17166400000 | -3.95761300000 |
| C | 2.48181800000  | -4.11634700000 | -2.55773300000 |
| C | 2.89236600000  | -3.44654200000 | -3.69759600000 |
| H | 2.73946800000  | -1.65744000000 | -4.85705000000 |
| H | 2.84758500000  | -5.11911400000 | -2.36714300000 |
| C | 1.01572400000  | -0.15791500000 | -3.42543300000 |
| H | 0.50744600000  | 0.23132000000  | -2.54104800000 |
| C | 1.11211200000  | -4.31610800000 | -0.45970100000 |
| H | 0.60379900000  | -3.62370400000 | 0.21434000000  |
| C | -2.79976800000 | 1.46274600000  | -1.27303200000 |
| H | -1.78482800000 | 1.07519300000  | -1.38021000000 |
| C | -3.21543100000 | -2.99849600000 | 1.17403700000  |
| H | -2.15576900000 | -3.00654900000 | 0.91152100000  |
| H | 3.58047600000  | -3.92186600000 | -4.38848200000 |
| H | -6.80378500000 | -0.10313700000 | 0.51880100000  |
| C | 2.13481900000  | 0.81799400000  | -3.78134700000 |
| H | 2.88124600000  | 0.87479700000  | -2.98627300000 |
| H | 2.64218100000  | 0.53119000000  | -4.70608700000 |
| H | 1.72000200000  | 1.81829100000  | -3.93088900000 |
| C | -0.00892100000 | -0.23046200000 | -4.55773300000 |
| H | 0.45107400000  | -0.61632400000 | -5.47227700000 |
| H | -0.84349000000 | -0.88285700000 | -4.29262500000 |
| H | -0.40635000000 | 0.76500300000  | -4.77462400000 |
| C | -3.34477200000 | 1.71391800000  | -2.67743600000 |

|   |                 |                 |                 |
|---|-----------------|-----------------|-----------------|
| H | -3.379202000000 | 0.790086000000  | -3.259884000000 |
| H | -4.354838000000 | 2.131068000000  | -2.643664000000 |
| H | -2.706780000000 | 2.426980000000  | -3.206163000000 |
| C | -2.716887000000 | 2.765499000000  | -0.478946000000 |
| H | -3.706550000000 | 3.213476000000  | -0.352802000000 |
| H | -2.291309000000 | 2.598793000000  | 0.513530000000  |
| H | -2.084962000000 | 3.487570000000  | -1.002696000000 |
| C | -3.857001000000 | -4.226491000000 | 0.530817000000  |
| H | -3.760193000000 | -4.199332000000 | -0.557208000000 |
| H | -3.374556000000 | -5.137947000000 | 0.893693000000  |
| H | -4.920857000000 | -4.291097000000 | 0.775067000000  |
| C | -3.315640000000 | -3.065529000000 | 2.696985000000  |
| H | -4.358816000000 | -3.083447000000 | 3.024412000000  |
| H | -2.833006000000 | -3.973955000000 | 3.067071000000  |
| H | -2.828959000000 | -2.206246000000 | 3.164827000000  |
| C | 0.092716000000  | -5.371087000000 | -0.891870000000 |
| H | -0.291587000000 | -5.909125000000 | -0.020900000000 |
| H | -0.752153000000 | -4.915102000000 | -1.413243000000 |
| H | 0.553021000000  | -6.100844000000 | -1.564339000000 |
| C | 2.254680000000  | -4.959903000000 | 0.320580000000  |
| H | 2.996441000000  | -4.217984000000 | 0.625315000000  |
| H | 1.865161000000  | -5.440605000000 | 1.221686000000  |
| H | 2.763500000000  | -5.728075000000 | -0.267357000000 |
| C | 1.930369000000  | -0.635498000000 | 2.190096000000  |
| H | 1.268847000000  | 0.199920000000  | 2.459074000000  |
| C | 1.440944000000  | -1.897649000000 | 2.890215000000  |
| H | 1.463411000000  | -1.772939000000 | 3.976805000000  |
| H | 0.422023000000  | -2.164035000000 | 2.603477000000  |
| H | 2.089838000000  | -2.745096000000 | 2.644222000000  |
| C | 3.332728000000  | -0.296543000000 | 2.672723000000  |
| H | 3.350919000000  | -0.170425000000 | 3.759197000000  |
| H | 4.029217000000  | -1.104735000000 | 2.420533000000  |
| H | 3.700365000000  | 0.618984000000  | 2.209391000000  |

**IPr-TS2<sup>iPr</sup>-B**  $\nu$ 115 cm<sup>-1</sup> Etot = -1506.453144965230

|   |                 |                 |                 |
|---|-----------------|-----------------|-----------------|
| C | -0.280061000000 | -0.908647000000 | 0.399879000000  |
| C | 0.860737000000  | -1.082665000000 | -0.335624000000 |
| N | -1.357072000000 | -1.267293000000 | -0.400015000000 |
| C | -0.979874000000 | -1.644098000000 | -1.638715000000 |
| N | 0.379415000000  | -1.534041000000 | -1.582418000000 |
| H | -0.418380000000 | -0.563321000000 | 1.409854000000  |
| O | 4.373421000000  | -2.499470000000 | -0.425504000000 |
| C | 2.259986000000  | -0.880779000000 | 0.030010000000  |
| O | 2.842670000000  | 0.017398000000  | -0.956688000000 |
| H | 3.717733000000  | -0.325866000000 | -1.154249000000 |

|   |                 |                 |                 |
|---|-----------------|-----------------|-----------------|
| C | 4.838632000000  | -3.275581000000 | 0.639216000000  |
| H | 5.311201000000  | -2.673230000000 | 1.431051000000  |
| H | 4.037511000000  | -3.859736000000 | 1.116397000000  |
| H | 5.591418000000  | -3.984817000000 | 0.276573000000  |
| H | 3.450798000000  | -2.030661000000 | -0.152475000000 |
| C | -2.709359000000 | -1.222706000000 | 0.046872000000  |
| C | -3.472006000000 | -0.075473000000 | -0.208665000000 |
| C | -3.234313000000 | -2.318753000000 | 0.745342000000  |
| C | -4.790027000000 | -0.051853000000 | 0.241007000000  |
| C | -4.554687000000 | -2.245211000000 | 1.181329000000  |
| C | -5.329016000000 | -1.124552000000 | 0.930572000000  |
| H | -5.401645000000 | 0.823728000000  | 0.050797000000  |
| H | -4.983939000000 | -3.081279000000 | 1.723033000000  |
| C | 1.178845000000  | -1.938360000000 | -2.696903000000 |
| C | 1.502172000000  | -1.007604000000 | -3.693396000000 |
| C | 1.566091000000  | -3.283537000000 | -2.793699000000 |
| C | 2.245908000000  | -1.446893000000 | -4.785501000000 |
| C | 2.315672000000  | -3.673363000000 | -3.901295000000 |
| C | 2.657480000000  | -2.764994000000 | -4.888416000000 |
| H | 2.503547000000  | -0.745585000000 | -5.571536000000 |
| H | 2.626777000000  | -4.707282000000 | -3.998205000000 |
| C | 1.021114000000  | 0.425362000000  | -3.642742000000 |
| H | 0.657194000000  | 0.612257000000  | -2.631245000000 |
| C | 1.130466000000  | -4.317512000000 | -1.776388000000 |
| H | 0.859775000000  | -3.784622000000 | -0.861494000000 |
| C | -2.909313000000 | 1.122139000000  | -0.941994000000 |
| H | -1.870939000000 | 0.898586000000  | -1.194097000000 |
| C | -2.415458000000 | -3.557133000000 | 1.036751000000  |
| H | -1.454799000000 | -3.446022000000 | 0.529665000000  |
| H | 3.239664000000  | -3.087174000000 | -5.745371000000 |
| H | -6.356924000000 | -1.087151000000 | 1.275195000000  |
| C | -0.114737000000 | -5.051677000000 | -2.276594000000 |
| H | 0.108601000000  | -5.599634000000 | -3.197115000000 |
| H | -0.459224000000 | -5.772073000000 | -1.529428000000 |
| H | -0.926585000000 | -4.350719000000 | -2.480312000000 |
| C | 2.223489000000  | -5.319143000000 | -1.418864000000 |
| H | 3.129998000000  | -4.812876000000 | -1.083560000000 |
| H | 1.875524000000  | -5.969571000000 | -0.611946000000 |
| H | 2.478719000000  | -5.961704000000 | -2.265650000000 |
| C | -3.081853000000 | -4.818252000000 | 0.491316000000  |
| H | -3.267423000000 | -4.736407000000 | -0.582268000000 |
| H | -2.438578000000 | -5.685874000000 | 0.659914000000  |
| H | -4.037060000000 | -5.011631000000 | 0.986728000000  |
| C | -2.138965000000 | -3.693918000000 | 2.533465000000  |
| H | -3.069579000000 | -3.820414000000 | 3.094077000000  |
| H | -1.510084000000 | -4.567556000000 | 2.724910000000  |

|   |                 |                 |                 |
|---|-----------------|-----------------|-----------------|
| H | -1.625476000000 | -2.812066000000 | 2.924233000000  |
| C | -3.656105000000 | 1.378025000000  | -2.249642000000 |
| H | -3.201111000000 | 2.214047000000  | -2.787620000000 |
| H | -3.628610000000 | 0.499673000000  | -2.898986000000 |
| H | -4.704024000000 | 1.630188000000  | -2.064582000000 |
| C | -2.915579000000 | 2.368564000000  | -0.058572000000 |
| H | -3.934538000000 | 2.655591000000  | 0.215531000000  |
| H | -2.351110000000 | 2.203845000000  | 0.862501000000  |
| H | -2.462742000000 | 3.209918000000  | -0.589913000000 |
| C | 2.131996000000  | 1.431994000000  | -3.925430000000 |
| H | 2.969322000000  | 1.289256000000  | -3.240687000000 |
| H | 2.502482000000  | 1.350064000000  | -4.950764000000 |
| H | 1.752985000000  | 2.449631000000  | -3.796193000000 |
| C | -0.143908000000 | 0.631330000000  | -4.612002000000 |
| H | 0.177500000000  | 0.464554000000  | -5.644515000000 |
| H | -0.965600000000 | -0.055671000000 | -4.397574000000 |
| H | -0.524566000000 | 1.654174000000  | -4.539074000000 |
| C | 2.386505000000  | -0.288893000000 | 1.432967000000  |
| H | 1.640217000000  | 0.519990000000  | 1.577982000000  |
| C | 2.138105000000  | -1.347672000000 | 2.506549000000  |
| H | 2.049878000000  | -0.892042000000 | 3.498680000000  |
| H | 1.229163000000  | -1.922338000000 | 2.319006000000  |
| H | 2.978829000000  | -2.048470000000 | 2.532097000000  |
| C | 3.753736000000  | 0.340818000000  | 1.673727000000  |
| H | 3.816802000000  | 0.739800000000  | 2.690992000000  |
| H | 4.548397000000  | -0.402698000000 | 1.554609000000  |
| H | 3.950433000000  | 1.155902000000  | 0.975919000000  |

**IPr-III<sup>iPr</sup>-B**

Etot = -1506.445443929113

|   |                 |                 |                 |
|---|-----------------|-----------------|-----------------|
| C | -0.325074000000 | -0.785720000000 | 0.309528000000  |
| C | 0.793091000000  | -1.106425000000 | -0.445284000000 |
| N | -1.450208000000 | -1.078372000000 | -0.464512000000 |
| C | -1.144693000000 | -1.517541000000 | -1.693937000000 |
| N | 0.226062000000  | -1.533780000000 | -1.673943000000 |
| H | -0.420385000000 | -0.382434000000 | 1.301489000000  |
| O | 4.883291000000  | 1.249903000000  | -1.367140000000 |
| C | 2.176771000000  | -1.164986000000 | -0.131095000000 |
| O | 3.028757000000  | -0.749792000000 | -1.236388000000 |
| H | 3.447870000000  | -1.535426000000 | -1.591580000000 |
| C | 6.061317000000  | 0.642855000000  | -1.845906000000 |
| H | 5.913454000000  | 0.165361000000  | -2.823052000000 |
| H | 6.822056000000  | 1.417959000000  | -1.960406000000 |
| H | 6.449477000000  | -0.113040000000 | -1.151476000000 |
| H | 4.201133000000  | 0.550622000000  | -1.264931000000 |
| C | -2.777349000000 | -0.875655000000 | 0.005251000000  |

|   |                 |                 |                 |
|---|-----------------|-----------------|-----------------|
| C | -3.418539000000 | 0.340031000000  | -0.268145000000 |
| C | -3.401506000000 | -1.887931000000 | 0.746068000000  |
| C | -4.718799000000 | 0.515607000000  | 0.200359000000  |
| C | -4.701143000000 | -1.666755000000 | 1.194831000000  |
| C | -5.357553000000 | -0.477312000000 | 0.923831000000  |
| H | -5.237583000000 | 1.446181000000  | -0.004546000000 |
| H | -5.207988000000 | -2.440545000000 | 1.761683000000  |
| C | 0.947636000000  | -2.034064000000 | -2.797769000000 |
| C | 1.362686000000  | -3.373453000000 | -2.800365000000 |
| C | 1.178571000000  | -1.198377000000 | -3.899852000000 |
| C | 2.025710000000  | -3.857776000000 | -3.925788000000 |
| C | 1.837063000000  | -1.728597000000 | -5.005953000000 |
| C | 2.263762000000  | -3.045920000000 | -5.021890000000 |
| H | 2.347658000000  | -4.893348000000 | -3.949179000000 |
| H | 2.018831000000  | -1.098088000000 | -5.869984000000 |
| C | 1.056563000000  | -4.310838000000 | -1.652332000000 |
| H | 0.705927000000  | -3.700458000000 | -0.818554000000 |
| C | 0.726594000000  | 0.245444000000  | -3.926193000000 |
| H | 0.324387000000  | 0.480853000000  | -2.938841000000 |
| C | -2.743965000000 | 1.449042000000  | -1.045175000000 |
| H | -1.739464000000 | 1.106283000000  | -1.301563000000 |
| C | -2.713683000000 | -3.200816000000 | 1.048930000000  |
| H | -1.703304000000 | -3.144661000000 | 0.639133000000  |
| H | 2.777165000000  | -3.441867000000 | -5.891734000000 |
| H | -6.370767000000 | -0.323237000000 | 1.279606000000  |
| C | -0.061196000000 | -5.280988000000 | -2.036084000000 |
| H | -0.963094000000 | -4.745922000000 | -2.342975000000 |
| H | 0.248983000000  | -5.923997000000 | -2.865177000000 |
| H | -0.316763000000 | -5.923693000000 | -1.188758000000 |
| C | 2.287685000000  | -5.075702000000 | -1.174619000000 |
| H | 2.675143000000  | -5.745021000000 | -1.947268000000 |
| H | 3.087697000000  | -4.390977000000 | -0.882318000000 |
| H | 2.033155000000  | -5.689189000000 | -0.306197000000 |
| C | -0.392185000000 | 0.452612000000  | -4.946478000000 |
| H | -1.245488000000 | -0.196208000000 | -4.735824000000 |
| H | -0.738550000000 | 1.489851000000  | -4.927331000000 |
| H | -0.041051000000 | 0.234897000000  | -5.959526000000 |
| C | 1.883809000000  | 1.203854000000  | -4.199166000000 |
| H | 1.533752000000  | 2.238675000000  | -4.149420000000 |
| H | 2.682407000000  | 1.077614000000  | -3.465297000000 |
| H | 2.307246000000  | 1.046287000000  | -5.194835000000 |
| C | -2.592068000000 | -3.438243000000 | 2.552785000000  |
| H | -2.043502000000 | -4.364271000000 | 2.745018000000  |
| H | -2.059518000000 | -2.618764000000 | 3.042020000000  |
| H | -3.575773000000 | -3.530515000000 | 3.021647000000  |
| C | -3.427626000000 | -4.369182000000 | 0.370826000000  |

|   |                 |                 |                 |
|---|-----------------|-----------------|-----------------|
| H | -3.483282000000 | -4.224304000000 | -0.710785000000 |
| H | -2.893024000000 | -5.303530000000 | 0.562644000000  |
| H | -4.446905000000 | -4.482473000000 | 0.750588000000  |
| C | -2.604912000000 | 2.715945000000  | -0.202669000000 |
| H | -3.583127000000 | 3.120096000000  | 0.072079000000  |
| H | -2.049276000000 | 2.519756000000  | 0.717558000000  |
| H | -2.071346000000 | 3.487144000000  | -0.764668000000 |
| C | -3.480254000000 | 1.744172000000  | -2.350768000000 |
| H | -3.553224000000 | 0.849706000000  | -2.974122000000 |
| H | -4.493982000000 | 2.107758000000  | -2.160059000000 |
| H | -2.950921000000 | 2.513816000000  | -2.918967000000 |
| C | 2.689174000000  | -0.574141000000 | 1.163721000000  |
| H | 3.779329000000  | -0.703901000000 | 1.118068000000  |
| C | 2.442390000000  | 0.933984000000  | 1.336705000000  |
| H | 2.938806000000  | 1.322592000000  | 2.233120000000  |
| H | 2.823836000000  | 1.492373000000  | 0.477979000000  |
| H | 1.374726000000  | 1.152153000000  | 1.428489000000  |
| C | 2.228032000000  | -1.332492000000 | 2.406594000000  |
| H | 1.143703000000  | -1.286933000000 | 2.534145000000  |
| H | 2.508868000000  | -2.387087000000 | 2.340477000000  |
| H | 2.680745000000  | -0.912521000000 | 3.310721000000  |
